# Supplementary material
Source: ML conference proceedings conference paper supplement (https://proceedings.neurips.cc/paper_files/paper/2020/hash/a992995ef4f0439b258f2360dbb85511-Abstract.html)
Supplement: Supplementary file [file a992995ef4f0439b258f2360dbb85511-Supplemental.zip]

# Appendix

## Table of Contents

|     |                                                                 |           |
|-----|-----------------------------------------------------------------|-----------|
| 382 | <b>A Filtration, Additional Notations and List of Constants</b> | <b>11</b> |
| 383 | <b>B Proof of Theorem 3.1</b>                                   | <b>13</b> |
| 384 | <b>C Proof of Corollary 3.2</b>                                 | <b>18</b> |
| 385 | <b>D Key Lemmas for Proving Theorem 3.1</b>                     | <b>18</b> |
| 386 | <b>E Other Supporting Lemmas for Proving Theorem 3.1</b>        | <b>32</b> |
| 387 | <b>F Proof of Theorem 4.1</b>                                   | <b>34</b> |
| 388 | <b>G Proof of Corollary 4.2</b>                                 | <b>38</b> |
| 389 | <b>H Key Lemmas for Proving Theorem 4.1</b>                     | <b>42</b> |
| 390 | <b>I Other Supporting Lemmas for Proving Theorem 4.1</b>        | <b>48</b> |
| 391 | <b>J Other Lemmas on Constant-Level Bounds</b>                  | <b>53</b> |

## A Filtration, Additional Notations and List of Constants

### Filtration for I.I.D. samples

The definition of filtration is similar as that in VRTD (Appendix D, [27]). Recall that in Algorithm 1,  $B_m$  consists of  $M$  independent samples that are sampled from  $\mu_{\pi_b}$ , and  $x_t^{(m)}$  is another independent sample sampled in the  $t$ -th iteration of the  $m$ -th epoch. Let  $\sigma(A \cup B)$  be the smallest  $\sigma$ -field that includes both  $A$  and  $B$ . Then we define the filtration for I.I.D. samples as follow

$$\begin{aligned}
F_{1,0} &= \sigma(\tilde{\theta}^{(0)}, \tilde{w}^{(0)}), F_{1,1} = \sigma(F_{1,0} \cup \sigma(B_1) \cup \sigma(x_0^{(1)})), \dots, F_{1,M} = \sigma(F_{1,M-1} \cup \sigma(x_{M-1}^{(1)})) \\
F_{2,0} &= \sigma(F_{1,M} \cup \sigma(\tilde{\theta}^{(1)}, \tilde{w}^{(1)})), F_{2,1} = \sigma(F_{2,0} \cup \sigma(B_2) \cup \sigma(x_0^{(2)})), \dots, F_{2,M} = \sigma(F_{2,M-1} \cup \sigma(x_{M-1}^{(2)})) \\
&\vdots \\
F_{m,0} &= \sigma(F_{m-1,M} \cup \sigma(\tilde{\theta}^{(m-1)}, \tilde{w}^{(m-1)})), F_{m,1} = \sigma(F_{m,0} \cup \sigma(B_m) \cup \sigma(x_0^{(m)})), \dots, \\
&F_{m,M} = \sigma(F_{m,M-1} \cup \sigma(x_{M-1}^{(m)})).
\end{aligned}$$

Moreover, we define  $\mathbb{E}_{t,m}$  as the conditional expectation with respect to the  $\sigma$ -field  $F_{t,m}$ .

### Filtration for Markovian samples

The definition of filtration is similar as that in VRTD (Appendix E, [27]). We first recall that  $B_m$  denotes the set of Markovian samples used in the  $m$ -th epoch, and we also abuse the notation here by letting  $x_t^{(m)}$  be the sample picked in the  $t$ -th iteration of the  $m$ -th epoch. Then, we define the filtration for Markovian samples as follows

$$\begin{aligned}
F_{1,0} &= \sigma(B_0 \cup \sigma(\tilde{\theta}^{(0)}, \tilde{w}^{(0)})), F_{1,1} = \sigma(F_{1,0} \cup \sigma(x_0^{(1)})), \dots, F_{1,M} = \sigma(F_{1,M-1} \cup \sigma(x_{M-1}^{(1)})) \\
F_{2,0} &= \sigma(B_1 \cup F_{1,M} \cup \sigma(\tilde{\theta}^{(1)}, \tilde{w}^{(1)})), F_{2,1} = \sigma(F_{2,0} \cup \sigma(x_0^{(2)})), \dots, F_{2,M} = \sigma(F_{2,M-1} \cup \sigma(x_{M-1}^{(2)}))
\end{aligned}$$

⋮

$$F_{m,0} = \sigma(B_{m-1} \cup F_{m-1,M} \cup \sigma(\tilde{\theta}^{(m-1)}, \tilde{w}^{(m-1)})), F_{m,1} = \sigma(F_{m,0} \cup \sigma(x_0^{(m)})), \dots,$$

$$F_{m,M} = \sigma(F_{m,M-1} \cup \sigma(x_{M-1}^{(m)})).$$

Moreover, we define  $\mathbb{E}_{t,m}$  as the conditional expectation with respect to the  $\sigma$ -field  $F_{t,m}$ .

#### Additional Notations

Recall the one-step TDC update at  $\theta_t^{(m)}$ :

$$\begin{aligned} A_t^{(m)}\theta + b_t^{(m)} + B_t^{(m)}w &= A_t^{(m)}\theta + b_t^{(m)} + B_t^{(m)}z + B_t^{(m)}(-C^{-1}(b + A\theta)) \\ &= (A_t^{(m)} - B_t^{(m)}C^{-1}A)\theta + b_t^{(m)} - B_t^{(m)}C^{-1}b + B_t^{(m)}z. \end{aligned}$$

Define  $\hat{A}_t^{(m)} := A_t^{(m)} - B_t^{(m)}C^{-1}A$  and  $\hat{b}_t^{(m)} := b_t^{(m)} - B_t^{(m)}C^{-1}b$ . Then, we further define

$$G_t^{(m)}(\theta, z) := \hat{A}_t^{(m)}\theta + \hat{b}_t^{(m)} + B_t^{(m)}z.$$

Moreover, we define

$$\lambda_{\hat{A}} := -\lambda_{\max}(\hat{A} + \hat{A}^\top) = -\lambda_{\max}(2A^\top C^{-1}A) < 0.$$

Similarly, recall the one-step TDC update at  $w_t^{(m)}$ :

$$\begin{aligned} A_t^{(m)}\theta + b_t^{(m)} + C_t^{(m)}w &= A_t^{(m)}\theta + b_t^{(m)} + C_t^{(m)}z + C_t^{(m)}(-C^{-1}(b + A\theta)) \\ &= (A_t^{(m)} - C_t^{(m)}C^{-1}A)\theta + b_t^{(m)} - C_t^{(m)}C^{-1}b + C_t^{(m)}z. \end{aligned}$$

Define  $\bar{A}_t^{(m)} := A_t^{(m)} - C_t^{(m)}C^{-1}A$  and  $\bar{b}_t^{(m)} := b_t^{(m)} - C_t^{(m)}C^{-1}b$ . Then, we further define

$$H_t^{(m)}(\theta, z) := \bar{A}_t^{(m)}\theta + \bar{b}_t^{(m)} + C_t^{(m)}z.$$

Moreover, we define

$$\lambda_C := -\lambda_{\max}(C + C^\top) = -\lambda_{\max}(2C) < 0.$$

#### List of Constants

We summerize all the constants that are used in the proof as follows.

#### Constants for both i.i.d. and Markovian setting:

$$\begin{aligned} \bullet G_{\text{VR}} &:= 3[(1 + \gamma)R_\theta + r_{\max}] \rho_{\max} \left(1 + \frac{\gamma \rho_{\max}}{\min |\lambda(C)|}\right), \\ \bullet H_{\text{VR}} &:= 3[(1 + \gamma)R_\theta + r_{\max}] \rho_{\max} \left(1 + \frac{1}{\min |\lambda(C)|}\right). \end{aligned}$$

#### Constants for i.i.d. setting:

$$\begin{aligned} \bullet K_1 &= [(1 + \gamma)R_\theta + r_{\max}]^2 \rho_{\max}^2 \left(1 + \frac{\gamma \rho_{\max}}{\min |\lambda(C)|}\right)^2, \\ \bullet K_2 &= [(1 + \gamma)R_\theta + r_{\max}]^2 \left(1 + \frac{1}{\min |\lambda(C)|}\right)^2, \\ \bullet C_1 &= \frac{2\rho_{\max}^2 \gamma^2}{\lambda_{\hat{A}}} \frac{3}{\lambda_C} \cdot 10(1 + \gamma)^2 \rho_{\max}^2 \cdot \left(1 + \frac{\gamma \rho_{\max}}{\min |\lambda(C)|}\right)^2 \left(1 + \frac{2}{\lambda_C}\right) \cdot \left(\rho_{\max} \frac{1 + \gamma}{\min |\lambda(C)|}\right)^2, \\ \bullet C_2 &= \frac{2\rho_{\max}^2 \gamma^2}{\lambda_{\hat{A}}} \frac{3}{\lambda_C} \cdot 10(1 + \gamma)^2 \rho_{\max}^2 \cdot \left(1 + \frac{1}{\min |\lambda(C)|}\right)^2, \\ \bullet C_3 &= 10(1 + \gamma)^2 \rho_{\max}^2 \cdot \left(1 + \frac{\gamma \rho_{\max}}{\min |\lambda(C)|}\right)^2 \left(1 + \frac{2}{\lambda_C}\right) \cdot \left(\rho_{\max} \frac{1 + \gamma}{\min |\lambda(C)|}\right)^2, \\ \bullet C_4 &= 10(1 + \gamma)^2 \rho_{\max}^2 \cdot \left(1 + \frac{1}{\min |\lambda(C)|}\right)^2, \\ \bullet D &= \frac{12}{\lambda_{\hat{A}}} \left\{ \frac{1}{\alpha M} + \alpha \cdot 5(1 + \gamma)^2 \rho_{\max}^2 \left(1 + \frac{\gamma \rho_{\max}}{\min |\lambda(C)|}\right)^2 + \frac{\alpha^2}{\beta^2} \cdot C_1 + \beta \cdot C_2 \right\}, \\ \bullet E &= \frac{1}{M\beta} \cdot \frac{2}{\lambda_C}, \\ \bullet F &= \frac{4}{\lambda_C} \left[ \frac{1}{\beta M} + \beta \cdot 10 + \frac{\alpha^2}{\beta^2} \cdot 10\gamma^2 \rho_{\max}^2 \left(1 + \frac{2}{\lambda_C}\right) \cdot \left(\rho_{\max} \frac{1 + \gamma}{\min |\lambda(C)|}\right)^2 + \left(\frac{\alpha^3}{\beta^2} \cdot C_3 + \alpha\beta \cdot C_4\right) \frac{30}{\lambda_{\hat{A}}} \gamma^2 \rho_{\max}^2 \right]. \end{aligned}$$

430 **Constants for Markovian setting:**

$$\begin{aligned}
431 \quad & \bullet K_1 := [(1+\gamma)R_\theta + r_{\max}]^2 \rho_{\max}^2 \left(1 + \frac{\gamma \rho_{\max}}{\min |\lambda(C)|}\right)^2 \cdot \left(1 + \kappa \frac{2\rho}{1-\rho}\right), \\
432 \quad & \bullet K_2 := \frac{2}{\lambda_{\hat{A}}} [R_\theta^2(1+\gamma)^2 + r_{\max}^2] \cdot 4\rho_{\max}^2 \left(1 + \frac{\gamma \rho_{\max}}{\min |\lambda(C)|}\right)^2 \left[1 + \kappa \frac{\rho}{1-\rho}\right], \\
433 \quad & \bullet K_3 := \left(\frac{32}{\lambda_C} [R_\theta^2(1+\gamma)^2 + r_{\max}^2] \cdot \rho_{\max}^2 + \frac{16}{\lambda_C} \frac{\rho_{\max}(1+\gamma)R_\theta + \rho_{\max}r_{\max}}{\min |\lambda(C)|}\right) \left[1 + \kappa \frac{\rho}{1-\rho}\right], \\
434 \quad & \bullet K_4 := \frac{12}{\lambda_C} R_w^2 \left[1 + \kappa \frac{\rho}{1-\rho}\right], \\
435 \quad & \bullet K_5 := [(1+\gamma)R_\theta + r_{\max}]^2 \rho_{\max}^2 \left(1 + \frac{1}{\min |\lambda(C)|}\right)^2 \cdot \left(1 + \kappa \frac{2\rho}{1-\rho}\right), \\
436 \quad & \bullet C_1 = \left(1 + \frac{\gamma \rho_{\max}}{\min |\lambda(C)|}\right)^2 \left(1 + \frac{2}{\lambda_C}\right) \cdot \left(\rho_{\max} \frac{1+\gamma}{\min |\lambda(C)|}\right)^2 \cdot \frac{96}{\lambda_{\hat{A}} \lambda_C} \gamma^2 \rho_{\max}^2 \cdot 10(1+\gamma)^2 \rho_{\max}^2, \\
437 \quad & \bullet C_2 = \left(1 + \frac{1}{\min |\lambda(C)|}\right)^2 \cdot \frac{96}{\lambda_{\hat{A}} \lambda_C} \gamma^2 \rho_{\max}^2 \cdot 10(1+\gamma)^2 \rho_{\max}^2, \\
438 \quad & \bullet D = \frac{16}{\lambda_{\hat{A}}} \left[\frac{1}{\alpha M} + \alpha \cdot 5(1+\gamma)^2 \rho_{\max}^2 \left(1 + \frac{\gamma \rho_{\max}}{\min |\lambda(C)|}\right)^2 + \frac{\alpha^2}{\beta^2} \cdot C_1 + \beta \cdot C_2\right], \\
439 \quad & \bullet E = \frac{1}{M\beta} \cdot \frac{12}{\lambda_C}, \\
440 \quad & \bullet F = \frac{24}{\lambda_C} \cdot \left[\frac{1}{\beta M} + 10\beta + 10\gamma^2 \rho_{\max}^2 \left(1 + \frac{1}{\lambda_C}\right) \cdot \left(\rho_{\max} \frac{1+\gamma}{\min |\lambda(C)|}\right)^2 \frac{\alpha^2}{\beta^2} + \alpha \cdot 120(1+\gamma)^2 \rho_{\max}^2 \frac{1}{\lambda_{\hat{A}}} \cdot \right. \\
441 \quad & \left. \left[\left(1 + \frac{\gamma \rho_{\max}}{\min |\lambda(C)|}\right)^2 \left(1 + \frac{2}{\lambda_C}\right) \cdot \left(\rho_{\max} \frac{1+\gamma}{\min |\lambda(C)|}\right)^2 \frac{\alpha^2}{\beta^2} + \left(1 + \frac{1}{\min |\lambda(C)|}\right)^2 \beta\right] \cdot 5\gamma^2 \rho_{\max}^2\right].
\end{aligned}$$

442 **B Proof of Theorem 3.1**

443 Throughout the proof, we assume the learning rates  $\alpha, \beta$  and the batch size  $M$  satisfy the following  
444 conditions.

$$\alpha \leq \min \left\{ \frac{1}{5\lambda_{\hat{A}}}, \frac{\lambda_{\hat{A}}}{60} / \left[ (1+\gamma)^2 \rho_{\max}^2 \left(1 + \frac{\gamma \rho_{\max}}{\min |\lambda(C)|}\right)^2 \right] \right\}, \quad (3)$$

$$\frac{\alpha^2}{\beta^2} \cdot C_3 + \beta \cdot C_4 \leq \min \left\{ \frac{1-D}{144} \frac{\lambda_{\hat{A}}^2 \lambda_C}{\rho_{\max}^2 \gamma^2}, 5(1-D), C_4 \right\}, \quad (4)$$

$$M\beta > \frac{4}{\lambda_C}, \quad (5)$$

$$\frac{\lambda_C}{6} \beta - 10\beta^2 - 10\gamma^2 \rho_{\max}^2 \left(\alpha^2 + \frac{2\alpha^2}{\lambda_C} \frac{1}{\beta}\right) \cdot \left(\rho_{\max} \frac{1+\gamma}{\min |\lambda(C)|}\right)^2 \geq 0, \quad (6)$$

$$\frac{1}{\alpha M} + \alpha \cdot 5(1+\gamma)^2 \rho_{\max}^2 \left(1 + \frac{\gamma \rho_{\max}}{\min |\lambda(C)|}\right)^2 \leq \frac{\lambda_{\hat{A}}}{6}, \quad (7)$$

$$\begin{aligned}
& \frac{\alpha}{\beta^2 M} \cdot \frac{72\rho_{\max}^2 \gamma^2}{\lambda_{\hat{A}}^2} \frac{1}{\lambda_C} + \beta \cdot \frac{720\rho_{\max}^2 \gamma^2}{\lambda_{\hat{A}}^2} \frac{1}{\lambda_C} \\
& + \frac{\alpha^2}{\beta^2} \cdot \frac{720\rho_{\max}^2 \gamma^4}{\lambda_{\hat{A}}^2} \frac{1}{\lambda_C} \rho_{\max}^2 \left(1 + \frac{2}{\lambda_C}\right) \cdot \left(\rho_{\max} \frac{1+\gamma}{\min |\lambda(C)|}\right)^2 + \alpha \cdot \frac{60}{\lambda_{\hat{A}}} \gamma^2 \rho_{\max}^2 \leq 1, \quad (8)
\end{aligned}$$

$$\max\{D, E, F\} < 1, \quad (9)$$

445 where  $C_3$  and  $C_4$  are specified in eq.(24) and eq.(25), respectively, and  $D, E, F$  are specified in  
446 eq.(18), eq.(19), and eq.(23), respectively. We note that under the above conditions, all the supporting  
447 lemmas for proving the theorem are satisfied. Also, we note that for a sufficiently small target  
448 accuracy  $\epsilon$ , our choices of learning rates and batch size  $\alpha = \mathcal{O}(\epsilon^{\frac{3}{5}}), \beta = \mathcal{O}(\epsilon^{\frac{2}{5}}), M = \mathcal{O}(\epsilon^{-\frac{3}{5}})$  that  
449 are stated in the theorem satisfy the above conditions eqs. (3) to (9).

450 **Proof Sketch.** The proof consists of the following key steps.

- 451 1. Develop *preliminary bound for*  $\sum_{t=0}^{M-1} \|\theta_t^{(m)} - \theta^*\|^2$  (Lemma D.1).  
 452 We bound  $\sum_{t=0}^{M-1} \|\theta_t^{(m)} - \theta^*\|^2$  in terms of  $\sum_{t=0}^{M-1} \|z_t^{(m)}\|^2$ ,  $\|\tilde{z}^{(m-1)}\|^2$ , and  $\|\tilde{\theta}^{(m-1)} - \theta^*\|^2$ .  
 453
  - 454 2. Develop *preliminary bound for*  $\sum_{t=0}^{M-1} \|z_t^{(m)}\|^2$  (Lemma D.3).  
 455 We bound  $\sum_{t=0}^{M-1} \|z_t^{(m)}\|^2$  in terms of  $\sum_{t=0}^{M-1} \|\theta_t^{(m)} - \theta^*\|^2$ ,  $\|\tilde{z}^{(m-1)}\|^2$ , and  $\|\tilde{\theta}^{(m-1)} - \theta^*\|^2$ , and plug it into the preliminary bound of  $\sum_{t=0}^{M-1} \|\theta_t^{(m)} - \theta^*\|^2$ . Then, we obtain an  
 456 upper bound of  $\sum_{t=0}^{M-1} \|\theta_t^{(m)} - \theta^*\|^2$  in terms of  $\|\tilde{z}^{(m-1)}\|^2$ , and  $\|\tilde{\theta}^{(m-1)} - \theta^*\|^2$ .  
 457
  - 458 3. Develop *preliminary non-asymptotic bound for*  $\|\tilde{z}^{(m)}\|^2$  (Lemma D.2).  
 459 We develop a non-asymptotic bound for  $\|\tilde{z}^{(m)}\|^2$ .
  - 460 4. Develop *preliminary non-asymptotic bound for*  $\|\tilde{\theta}^m - \theta^*\|^2$  (Lemma D.4).  
 461 We plug the bound in Lemma D.2 into the previous upper bounds. Then, we obtain an  
 462 inequality between  $\mathbb{E}\|\tilde{\theta}^{(m)} - \theta^*\|$  and  $\mathbb{E}\|\tilde{\theta}^{(m-1)} - \theta^*\|$ . Telescoping this inequality leads  
 463 to the final result.
  - 464 5. Develop *refined bound for*  $\|\tilde{z}^{(m)}\|^2$  (Lemma D.5).  
 465 We bound  $\sum_{t=0}^{M-1} \|z_t^{(m)}\|^2$  in terms of  $\sum_{t=0}^{M-1} \|\theta_t^{(m)} - \theta^*\|^2$ ,  $\|\tilde{z}^{(m-1)}\|^2$ , and  $\|\tilde{\theta}^{(m-1)} - \theta^*\|^2$ . Then, we apply Lemma D.1 and obtain an upper bound of  $\sum_{t=0}^{M-1} \|z_t^{(m)}\|^2$  in terms  
 466 of  $\|\tilde{z}^{(m-1)}\|^2$  and  $\|\tilde{\theta}^{(m-1)} - \theta^*\|^2$ . Moreover, we apply Lemma D.2 and the preliminary  
 467 non-asymptotic bound of  $\|\tilde{\theta}^m - \theta^*\|^2$  to obtain an upper bound of  $\sum_{t=0}^{M-1} \|z_t^{(m)}\|^2$  in terms  
 468 of  $\|\tilde{z}^{(m-1)}\|^2$ . This gives the desired refined bound of  $\|\tilde{z}^m\|^2$ .  
 469
  - 470 6. Develop *refined bound for*  $\|\tilde{\theta}^m - \theta^*\|^2$  (Theorem 3.1).  
 471 We use the refined bound of  $\|\tilde{z}^m\|^2$  instead of the preliminary bound obtained in the step 4.
- 472 First, based on Lemma D.1, we have the following result

$$\begin{aligned}
& \frac{\lambda_{\hat{A}}}{6} \alpha \sum_{t=0}^{M-1} \mathbb{E}_{m,0} \|\theta_t^{(m)} - \theta^*\|^2 \\
& \leq \left[ 1 + \alpha^2 M \cdot 5(1 + \gamma)^2 \rho_{\max}^2 \left( 1 + \frac{\gamma \rho_{\max}}{\min |\lambda(C)|} \right)^2 \right] \mathbb{E}_{m,0} \|\tilde{\theta}^{(m-1)} - \theta^*\|^2 + \alpha^2 \cdot 5K_1 \\
& \quad + \alpha \cdot \frac{2\rho_{\max}^2 \gamma^2}{\lambda_{\hat{A}}} \sum_{t=0}^{M-1} \mathbb{E}_{m,0} \|z_t^{(m)}\|^2 + \alpha^2 M \cdot 5\gamma^2 \rho_{\max}^2 \mathbb{E}_{m,0} \|\tilde{z}^{(m-1)}\|^2.
\end{aligned}$$

473 Apply Lemma D.3 to bound the term  $\sum_{t=0}^{M-1} \mathbb{E}_{m,0} \|z_t^{(m)}\|^2$  in the above inequality, re-arrange the  
 474 obtained result and note that  $\frac{\lambda_C}{6} \beta - 10\beta^2 - 10\gamma^2 \rho_{\max}^2 \left( \alpha^2 + \frac{2\alpha^2}{\lambda_C} \frac{1}{\beta} \right) \cdot \left( \rho_{\max} \frac{1+\gamma}{\min |\lambda(C)|} \right)^2 \geq 0$ . Then,  
 475 we obtain the following inequality,

$$\begin{aligned}
& \frac{\lambda_{\hat{A}}}{12} \alpha \sum_{t=0}^{M-1} \mathbb{E}_{m,0} \|\theta_t^{(m)} - \theta^*\|^2 \\
& \leq \left\{ 1 + \alpha^2 M \cdot 5(1 + \gamma)^2 \rho_{\max}^2 \left( 1 + \frac{\gamma \rho_{\max}}{\min |\lambda(C)|} \right)^2 + \alpha M \cdot \left( \frac{\alpha^2}{\beta^2} \cdot C_1 + \beta \cdot C_2 \right) \right\} \mathbb{E}_{m,0} \|\tilde{\theta}^{(m-1)} - \theta^*\|^2 \\
& \quad + \left\{ \frac{\alpha}{\beta} \cdot \frac{2\rho_{\max}^2 \gamma^2}{\lambda_{\hat{A}}} \frac{3}{\lambda_C} \left[ 1 + \left[ 10\beta^2 + 10\gamma^2 \rho_{\max}^2 \left( 1 + \frac{2}{\lambda_C} \right) \cdot \left( \rho_{\max} \frac{1+\gamma}{\min |\lambda(C)|} \right)^2 \frac{\alpha^2}{\beta} \right] M \right] + \alpha^2 M \cdot 5\gamma^2 \rho_{\max}^2 \right\} \\
& \quad \cdot \mathbb{E}_{m,0} \|\tilde{z}^{(m-1)}\|^2 \\
& \quad + \alpha \beta \cdot \frac{60\rho_{\max}^2 \gamma^2}{\lambda_{\hat{A}} \lambda_C} \cdot K_2 + \frac{\alpha^3}{\beta^2} \cdot \frac{60\rho_{\max}^2 \gamma^2}{\lambda_{\hat{A}} \lambda_C} \cdot \left( \rho_{\max} \frac{1+\gamma}{\min |\lambda(C)|} \right)^2 K_1 \left( 1 + \frac{2}{\lambda_C} \right) + \alpha^2 \cdot 5K_1.
\end{aligned}$$

where  $C_1$  and  $C_2$  are specified in eq.(20) and eq.(21), respectively. Dividing  $\frac{\lambda_{\hat{A}}}{12}\alpha M$  and taking total expectation on both sides of the above inequality, and applying Lemma D.5 to bound the term  $\mathbb{E}\|\tilde{z}^{(m-1)}\|^2$ , we obtain that

$$\begin{aligned}
& \mathbb{E}\|\tilde{\theta}^{(m)} - \theta^*\|^2 \\
& \leq D \cdot \mathbb{E}_{m,0}\|\tilde{\theta}^{(m-1)} - \theta^*\|^2 \\
& \quad + \frac{12}{\lambda_{\hat{A}}} \frac{1}{\alpha M} \left\{ \frac{\alpha}{\beta} \cdot \frac{2\rho_{\max}^2 \gamma^2}{\lambda_{\hat{A}}} \frac{3}{\lambda_C} \left[ 1 + \left[ 10\beta^2 + 10\gamma^2 \rho_{\max}^2 \left(1 + \frac{2}{\lambda_C}\right) \cdot \left(\rho_{\max} \frac{1+\gamma}{\min|\lambda(C)|}\right)^2 \frac{\alpha^2}{\beta} \right] M \right] + \alpha^2 M \cdot 5\gamma^2 \rho_{\max}^2 \right\} \\
& \quad \times \left\{ F^{m-1} \cdot \mathbb{E}\|\tilde{z}^{(0)}\|^2 + \frac{D^{m-1} - F^{m-1}}{D - F} \cdot \mathbb{E}\|\tilde{\theta}^{(0)} - \theta^*\|^2 + \frac{\frac{D^{m-1} - F^{m-1}}{D - F} - \frac{E^{m-1} - F^{m-1}}{E - F}}{D - E} \mathbb{E}\|\tilde{z}^{(0)}\|^2 \right. \\
& \quad + \frac{1}{1 - F} \frac{1}{1 - D} \frac{1152}{\lambda_{\hat{A}}^2} \frac{\rho_{\max}^2 \gamma^2}{\lambda_C^2} \left( \frac{\alpha^2}{\beta^2} \cdot C_3 + \beta \cdot C_4 \right) \left[ \frac{1}{\beta M} + \beta \cdot 20 + \frac{\alpha^2}{\beta^2} \cdot 20\gamma^2 \rho_{\max}^2 \left(1 + \frac{2}{\lambda_C}\right) \cdot \left(\rho_{\max} \frac{1+\gamma}{\min|\lambda(C)|}\right)^2 \right] \\
& \quad \times \left[ \beta \cdot \frac{24}{\lambda_C} H_{\text{VR}}^2 + \frac{\alpha^2}{\beta^2} \cdot \left(1 + \frac{2}{\lambda_C}\right) \cdot \frac{2}{\lambda_C} \left(\rho_{\max} \frac{1+\gamma}{\min|\lambda(C)|}\right)^2 G_{\text{VR}}^2 \right] \\
& \quad + \frac{1}{1 - F} \frac{1}{1 - D} \left[ \frac{\beta}{M} \cdot \left( \frac{80}{\lambda_C} K_2 + C_4 \frac{600}{\lambda_C} \frac{K_1}{\lambda_{\hat{A}}} \right) + \frac{\alpha^2}{\beta^2} \frac{1}{M} \cdot \left( \frac{80}{\lambda_C} \left(\rho_{\max} \frac{1+\gamma}{\min|\lambda(C)|}\right)^2 K_1 \left(1 + \frac{2}{\lambda_C}\right) + C_3 \frac{600}{\lambda_C} \frac{K_1}{\lambda_{\hat{A}}} \right) \right] \Big\} \\
& \quad + \frac{12}{\lambda_{\hat{A}}} \frac{1}{\alpha M} \left\{ \alpha \beta \cdot \frac{60\rho_{\max}^2 \gamma^2}{\lambda_{\hat{A}} \lambda_C} \cdot K_2 + \frac{\alpha^3}{\beta^2} \cdot \frac{60\rho_{\max}^2 \gamma^2}{\lambda_{\hat{A}} \lambda_C} \cdot \left(\rho_{\max} \frac{1+\gamma}{\min|\lambda(C)|}\right)^2 K_1 \left(1 + \frac{2}{\lambda_C}\right) + \alpha^2 \cdot 5K_1 \right\}.
\end{aligned}$$

Note that the second coefficient in the above inequality can be simplified as

$$\begin{aligned}
& \frac{12}{\lambda_{\hat{A}}} \frac{1}{\alpha M} \left\{ \frac{\alpha}{\beta} \cdot \frac{2\rho_{\max}^2 \gamma^2}{\lambda_{\hat{A}}} \frac{3}{\lambda_C} \left[ 1 + \left[ 10\beta^2 + 10\gamma^2 \rho_{\max}^2 \left(1 + \frac{2}{\lambda_C}\right) \cdot \left(\rho_{\max} \frac{1+\gamma}{\min|\lambda(C)|}\right)^2 \frac{\alpha^2}{\beta} \right] M \right] + \alpha^2 M \cdot 5\gamma^2 \rho_{\max}^2 \right\} \\
& = \frac{12}{\lambda_{\hat{A}}} \left\{ \frac{\alpha}{\beta} \cdot \frac{2\rho_{\max}^2 \gamma^2}{\lambda_{\hat{A}}} \frac{3}{\lambda_C} \left[ \frac{1}{\beta M} + 10\beta + 10\gamma^2 \rho_{\max}^2 \left(1 + \frac{2}{\lambda_C}\right) \cdot \left(\rho_{\max} \frac{1+\gamma}{\min|\lambda(C)|}\right)^2 \frac{\alpha^2}{\beta^2} \right] + \alpha \cdot 5\gamma^2 \rho_{\max}^2 \right\} \\
& = \frac{\alpha}{\beta^2 M} \cdot \frac{72\rho_{\max}^2 \gamma^2}{\lambda_{\hat{A}}^2} \frac{1}{\lambda_C} + \beta \cdot \frac{720\rho_{\max}^2 \gamma^2}{\lambda_{\hat{A}}^2} \frac{1}{\lambda_C} + \frac{\alpha^2}{\beta^2} \cdot \frac{720\rho_{\max}^2 \gamma^4}{\lambda_{\hat{A}}^2} \frac{1}{\lambda_C} \rho_{\max}^2 \left(1 + \frac{2}{\lambda_C}\right) \cdot \left(\rho_{\max} \frac{1+\gamma}{\min|\lambda(C)|}\right)^2 \\
& \quad + \alpha \cdot \frac{60}{\lambda_{\hat{A}}} \gamma^2 \rho_{\max}^2,
\end{aligned}$$

and note that we have assumed that

$$\begin{aligned}
& \frac{\alpha}{\beta^2 M} \cdot \frac{72\rho_{\max}^2 \gamma^2}{\lambda_{\hat{A}}^2} \frac{1}{\lambda_C} + \beta \cdot \frac{720\rho_{\max}^2 \gamma^2}{\lambda_{\hat{A}}^2} \frac{1}{\lambda_C} \\
& \quad + \frac{\alpha^2}{\beta^2} \cdot \frac{720\rho_{\max}^2 \gamma^4}{\lambda_{\hat{A}}^2} \frac{1}{\lambda_C} \rho_{\max}^2 \left(1 + \frac{2}{\lambda_C}\right) \cdot \left(\rho_{\max} \frac{1+\gamma}{\min|\lambda(C)|}\right)^2 + \alpha \cdot \frac{60}{\lambda_{\hat{A}}} \gamma^2 \rho_{\max}^2 \leq 1. \quad (10)
\end{aligned}$$

Then, we obtain that

$$\begin{aligned}
& \mathbb{E}\|\tilde{\theta}^{(m)} - \theta^*\|^2 \\
& \leq D \cdot \mathbb{E}_{m,0}\|\tilde{\theta}^{(m-1)} - \theta^*\|^2 + F^{m-1} \cdot \mathbb{E}\|\tilde{z}^{(0)}\|^2 + \frac{D^{m-1} - F^{m-1}}{D - F} \cdot \mathbb{E}\|\tilde{\theta}^{(0)} - \theta^*\|^2 \\
& \quad + \frac{\frac{D^{m-1} - F^{m-1}}{D - F} - \frac{E^{m-1} - F^{m-1}}{E - F}}{D - E} \mathbb{E}\|\tilde{z}^{(0)}\|^2 \\
& \quad + \left\{ \frac{\alpha}{\beta^2 M} \cdot \frac{72\rho_{\max}^2 \gamma^2}{\lambda_{\hat{A}}^2} \frac{1}{\lambda_C} + \beta \cdot \frac{720\rho_{\max}^2 \gamma^2}{\lambda_{\hat{A}}^2} \frac{1}{\lambda_C} \right. \\
& \quad + \frac{\alpha^2}{\beta^2} \cdot \frac{720\rho_{\max}^2 \gamma^4}{\lambda_{\hat{A}}^2} \frac{1}{\lambda_C} \rho_{\max}^2 \left(1 + \frac{2}{\lambda_C}\right) \cdot \left(\rho_{\max} \frac{1+\gamma}{\min|\lambda(C)|}\right)^2 + \alpha \cdot \frac{60}{\lambda_{\hat{A}}} \gamma^2 \rho_{\max}^2 \Big\} \\
& \quad \times \left\{ \frac{1}{1 - F} \frac{1}{1 - D} \frac{1152}{\lambda_{\hat{A}}^2} \frac{\rho_{\max}^2 \gamma^2}{\lambda_C^2} \left( \frac{\alpha^2}{\beta^2} \cdot C_3 + \beta \cdot C_4 \right) \left[ \frac{1}{\beta M} + \beta \cdot 20 + \frac{\alpha^2}{\beta^2} \cdot 20\gamma^2 \rho_{\max}^2 \left(1 + \frac{2}{\lambda_C}\right) \cdot \left(\rho_{\max} \frac{1+\gamma}{\min|\lambda(C)|}\right)^2 \right] \right.
\end{aligned}$$

$$\begin{aligned}
& \cdot \left[ \beta \cdot \frac{24}{\lambda_C} H_{\text{VR}}^2 + \frac{\alpha^2}{\beta^2} \cdot \left(1 + \frac{2}{\lambda_C}\right) \cdot \frac{2}{\lambda_C} \left(\rho_{\max} \frac{1+\gamma}{\min |\lambda(C)|}\right)^2 G_{\text{VR}}^2 \right] \\
& + \frac{1}{1-F} \frac{1}{1-D} \left[ \frac{\beta}{M} \cdot \left( \frac{80}{\lambda_C} K_2 + C_4 \frac{600}{\lambda_C} \frac{K_1}{\lambda_{\hat{A}}} \right) + \frac{\alpha^2}{\beta^2} \frac{1}{M} \cdot \left( \frac{80}{\lambda_C} \left(\rho_{\max} \frac{1+\gamma}{\min |\lambda(C)|}\right)^2 K_1 \left(1 + \frac{2}{\lambda_C}\right) + C_3 \frac{600}{\lambda_C} \frac{K_1}{\lambda_{\hat{A}}} \right) \right] \Big\} \\
& + \frac{12}{\lambda_{\hat{A}}} \frac{1}{\alpha M} \left\{ \alpha \beta \cdot \frac{60 \rho_{\max}^2 \gamma^2}{\lambda_{\hat{A}} \lambda_C} \cdot K_2 + \frac{\alpha^3}{\beta^2} \cdot \frac{60 \rho_{\max}^2 \gamma^2}{\lambda_{\hat{A}} \lambda_C} \cdot \left(\rho_{\max} \frac{1+\gamma}{\min |\lambda(C)|}\right)^2 K_1 \left(1 + \frac{2}{\lambda_C}\right) + \alpha^2 \cdot 5 K_1 \right\} \\
& \leq D \cdot \mathbb{E}_{m,0} \|\tilde{\theta}^{(m-1)} - \theta^*\|^2 + F^{m-1} \cdot \mathbb{E} \|\tilde{z}^{(0)}\|^2 + \frac{D^{m-1} - F^{m-1}}{D - F} \cdot \mathbb{E} \|\tilde{\theta}^{(0)} - \theta^*\|^2 \\
& \quad + \frac{\frac{D^{m-1} - F^{m-1}}{D-F} - \frac{E^{m-1} - F^{m-1}}{E-F}}{D - E} \mathbb{E} \|\tilde{z}^{(0)}\|^2 \\
& \quad + \left\{ \frac{\alpha}{\beta^2 M} \cdot \frac{72 \rho_{\max}^2 \gamma^2}{\lambda_{\hat{A}}^2} \frac{1}{\lambda_C} + \beta \cdot \frac{720 \rho_{\max}^2 \gamma^2}{\lambda_{\hat{A}}^2} \frac{1}{\lambda_C} \right. \\
& \quad + \frac{\alpha^2}{\beta^2} \cdot \frac{720 \rho_{\max}^2 \gamma^4}{\lambda_{\hat{A}}^2} \frac{1}{\lambda_C} \rho_{\max}^2 \left(1 + \frac{2}{\lambda_C}\right) \cdot \left(\rho_{\max} \frac{1+\gamma}{\min |\lambda(C)|}\right)^2 + \alpha \cdot \frac{60}{\lambda_{\hat{A}}} \gamma^2 \rho_{\max}^2 \Big\} \\
& \quad \cdot \left\{ \frac{1}{1-F} \frac{1}{1-D} \frac{1152}{\lambda_{\hat{A}}^2} \frac{\rho_{\max}^2 \gamma^2}{\lambda_C^2} \left( \frac{\alpha^2}{\beta^2} \cdot C_3 + \beta \cdot C_4 \right) \left[ \frac{1}{\beta M} + \beta \cdot 20 + \frac{\alpha^2}{\beta^2} \cdot 20 \gamma^2 \rho_{\max}^2 \left(1 + \frac{2}{\lambda_C}\right) \cdot \left(\rho_{\max} \frac{1+\gamma}{\min |\lambda(C)|}\right)^2 \right] \right. \\
& \quad \cdot \left[ \beta \cdot \frac{24}{\lambda_C} H_{\text{VR}}^2 + \frac{\alpha^2}{\beta^2} \cdot \left(1 + \frac{2}{\lambda_C}\right) \cdot \frac{2}{\lambda_C} \left(\rho_{\max} \frac{1+\gamma}{\min |\lambda(C)|}\right)^2 G_{\text{VR}}^2 \right] \Big\} \\
& \quad + \frac{1}{1-F} \frac{1}{1-D} \left[ \frac{\beta}{M} \cdot \left( \frac{80}{\lambda_C} K_2 + C_4 \frac{600}{\lambda_C} \frac{K_1}{\lambda_{\hat{A}}} \right) + \frac{\alpha^2}{\beta^2} \frac{1}{M} \cdot \left( \frac{80}{\lambda_C} \left(\rho_{\max} \frac{1+\gamma}{\min |\lambda(C)|}\right)^2 K_1 \left(1 + \frac{2}{\lambda_C}\right) + C_3 \frac{600}{\lambda_C} \frac{K_1}{\lambda_{\hat{A}}} \right) \right] \\
& \quad + \frac{1}{1-F} \frac{1}{1-D} \left\{ \frac{\beta}{M} \cdot \frac{720 \rho_{\max}^2 \gamma^2}{\lambda_{\hat{A}}^2 \lambda_C} \cdot K_2 + \frac{\alpha^2}{\beta^2} \frac{1}{M} \cdot \frac{720 \rho_{\max}^2 \gamma^2}{\lambda_{\hat{A}}^2 \lambda_C} \cdot \left(\rho_{\max} \frac{1+\gamma}{\min |\lambda(C)|}\right)^2 K_1 \left(1 + \frac{2}{\lambda_C}\right) + \frac{\alpha}{M} \cdot \frac{60}{\lambda_{\hat{A}}} K_1 \right\} \\
& = D \cdot \mathbb{E}_{m,0} \|\tilde{\theta}^{(m-1)} - \theta^*\|^2 + F^{m-1} \cdot \mathbb{E} \|\tilde{z}^{(0)}\|^2 + \frac{D^{m-1} - F^{m-1}}{D - F} \cdot \mathbb{E} \|\tilde{\theta}^{(0)} - \theta^*\|^2 \\
& \quad + \frac{\frac{D^{m-1} - F^{m-1}}{D-F} - \frac{E^{m-1} - F^{m-1}}{E-F}}{D - E} \mathbb{E} \|\tilde{z}^{(0)}\|^2 \\
& \quad + \left\{ \frac{\alpha}{\beta^2 M} \cdot \frac{72 \rho_{\max}^2 \gamma^2}{\lambda_{\hat{A}}^2} \frac{1}{\lambda_C} + \beta \cdot \frac{720 \rho_{\max}^2 \gamma^2}{\lambda_{\hat{A}}^2} \frac{1}{\lambda_C} \right. \\
& \quad + \frac{\alpha^2}{\beta^2} \cdot \frac{720 \rho_{\max}^2 \gamma^4}{\lambda_{\hat{A}}^2} \frac{1}{\lambda_C} \rho_{\max}^2 \left(1 + \frac{2}{\lambda_C}\right) \cdot \left(\rho_{\max} \frac{1+\gamma}{\min |\lambda(C)|}\right)^2 + \alpha \cdot \frac{60}{\lambda_{\hat{A}}} \gamma^2 \rho_{\max}^2 \Big\} \\
& \quad \cdot \left\{ \frac{1}{1-F} \frac{1}{1-D} \frac{1152}{\lambda_{\hat{A}}^2} \frac{\rho_{\max}^2 \gamma^2}{\lambda_C^2} \left( \frac{\alpha^2}{\beta^2} \cdot C_3 + \beta \cdot C_4 \right) \left[ \frac{1}{\beta M} + \beta \cdot 20 + \frac{\alpha^2}{\beta^2} \cdot 20 \gamma^2 \rho_{\max}^2 \left(1 + \frac{2}{\lambda_C}\right) \cdot \left(\rho_{\max} \frac{1+\gamma}{\min |\lambda(C)|}\right)^2 \right] \right. \\
& \quad \cdot \left[ \beta \cdot \frac{24}{\lambda_C} H_{\text{VR}}^2 + \frac{\alpha^2}{\beta^2} \cdot \left(1 + \frac{2}{\lambda_C}\right) \cdot \frac{2}{\lambda_C} \left(\rho_{\max} \frac{1+\gamma}{\min |\lambda(C)|}\right)^2 G_{\text{VR}}^2 \right] \Big\} \\
& \quad + \frac{1}{1-F} \frac{1}{1-D} \left\{ \frac{\beta}{M} \cdot \left[ \frac{720 \rho_{\max}^2 \gamma^2}{\lambda_{\hat{A}}^2 \lambda_C} K_2 + \left( \frac{80}{\lambda_C} K_2 + C_4 \frac{600}{\lambda_C} \frac{K_1}{\lambda_{\hat{A}}} \right) \right] \right. \\
& \quad + \frac{\alpha^2}{\beta^2} \frac{1}{M} \cdot \left[ \frac{720 \rho_{\max}^2 \gamma^2}{\lambda_{\hat{A}}^2 \lambda_C} \cdot \left(\rho_{\max} \frac{1+\gamma}{\min |\lambda(C)|}\right)^2 K_1 \left(1 + \frac{2}{\lambda_C}\right) + \left( \frac{80}{\lambda_C} \left(\rho_{\max} \frac{1+\gamma}{\min |\lambda(C)|}\right)^2 K_1 \left(1 + \frac{2}{\lambda_C}\right) + C_3 \frac{600}{\lambda_C} \frac{K_1}{\lambda_{\hat{A}}} \right) \right] \\
& \quad + \frac{\alpha}{M} \cdot \frac{60}{\lambda_{\hat{A}}} K_1 \Big\},
\end{aligned}$$

482 where we use eq.(10) in the first step, use  $1 < \frac{1}{1-D} \frac{1}{1-F}$  in the second step, and rearrange the terms  
483 in the last step. Next, we telescope the above inequality over  $m$ . To further simplify the result, we  
484 choose the optimal relation between  $\alpha$  and  $\beta$ , i.e.,  $\beta = \mathcal{O}(\alpha^{2/3})$ . Then, for sufficiently small  $\alpha$  and  
485  $\beta$ , we have  $D > E$  and  $D > F$ , and we obtain that

$$\mathbb{E} \|\tilde{\theta}^{(m)} - \theta^*\|^2$$

$$\begin{aligned}
&\leq D^m \cdot \|\tilde{\theta}^{(0)} - \theta^*\|^2 + D^{m-1} \cdot \mathbb{E}\|\tilde{z}^{(0)}\|^2 + \frac{mD^{m-1}}{D-F} \cdot \mathbb{E}\|\tilde{\theta}^{(0)} - \theta^*\|^2 + \frac{mD^{m-1}}{(D-E)(D-F)} \mathbb{E}\|\tilde{z}^{(0)}\|^2 \\
&+ \frac{1}{1-D} \left\{ \frac{\alpha}{\beta^2 M} \cdot \frac{72\rho_{\max}^2 \gamma^2}{\lambda_{\hat{A}}^2} \frac{1}{\lambda_C} \right. \\
&+ \beta \cdot \frac{720\rho_{\max}^2 \gamma^2}{\lambda_{\hat{A}}^2} \frac{1}{\lambda_C} + \frac{\alpha^2}{\beta^2} \cdot \frac{720\rho_{\max}^2 \gamma^4}{\lambda_{\hat{A}}^2} \frac{1}{\lambda_C} \rho_{\max}^2 \left(1 + \frac{2}{\lambda_C}\right) \cdot \left(\rho_{\max} \frac{1+\gamma}{\min|\lambda(C)|}\right)^2 + \alpha \cdot \frac{60}{\lambda_{\hat{A}}} \gamma^2 \rho_{\max}^2 \left. \right\} \\
&\times \left\{ \frac{1}{1-F} \frac{1}{1-D} \frac{1152}{\lambda_{\hat{A}}^2} \frac{\rho_{\max}^2 \gamma^2}{\lambda_C^2} \left( \frac{\alpha^2}{\beta^2} \cdot C_3 + \beta \cdot C_4 \right) \left[ \frac{1}{\beta M} + \beta \cdot 20 + \frac{\alpha^2}{\beta^2} \cdot 20\gamma^2 \rho_{\max}^2 \left(1 + \frac{2}{\lambda_C}\right) \cdot \left(\rho_{\max} \frac{1+\gamma}{\min|\lambda(C)|}\right)^2 \right] \right. \\
&\times \left[ \beta \cdot \frac{24}{\lambda_C} H_{\text{VR}}^2 + \frac{\alpha^2}{\beta^2} \cdot \left(1 + \frac{2}{\lambda_C}\right) \cdot \frac{2}{\lambda_C} \left(\rho_{\max} \frac{1+\gamma}{\min|\lambda(C)|}\right)^2 G_{\text{VR}}^2 \right] \left. \right\} \\
&+ \frac{1}{1-F} \frac{1}{(1-D)^2} \left\{ \frac{\beta}{M} \cdot \left[ \frac{720\rho_{\max}^2 \gamma^2}{\lambda_{\hat{A}}^2 \lambda_C} K_2 + \left( \frac{80}{\lambda_C} K_2 + C_4 \frac{600}{\lambda_C} \frac{K_1}{\lambda_{\hat{A}}} \right) \right] \right. \\
&+ \frac{\alpha^2}{\beta^2} \frac{1}{M} \cdot \left[ \frac{720\rho_{\max}^2 \gamma^2}{\lambda_{\hat{A}}^2 \lambda_C} \cdot \left(\rho_{\max} \frac{1+\gamma}{\min|\lambda(C)|}\right)^2 K_1 \left(1 + \frac{2}{\lambda_C}\right) + \left( \frac{80}{\lambda_C} \left(\rho_{\max} \frac{1+\gamma}{\min|\lambda(C)|}\right)^2 K_1 \left(1 + \frac{2}{\lambda_C}\right) \right. \right. \\
&\left. \left. + C_3 \frac{600}{\lambda_C} \frac{K_1}{\lambda_{\hat{A}}} \right) \right] + \frac{\alpha}{M} \cdot \frac{60}{\lambda_{\hat{A}}} K_1 \left. \right\}.
\end{aligned}$$

486 The first four terms in the right hand side of the above inequality are dominated by the order  $\mathcal{O}(mD^m)$ .  
 487 Also, under the choices of learning rates, the fifth term is in the order of  $\mathcal{O}(\beta^4)$  and the last term (in  
 488 the last three lines) is in the order of  $\mathcal{O}(\frac{\beta}{M})$ . To elaborate this, we note that the fifth term is a product  
 489 of two curly brackets: the first one is in the order of  $\mathcal{O}(\frac{\alpha}{\beta^2} \frac{1}{M}) + \mathcal{O}(\beta)$ , the second one is in the  
 490 order of  $\mathcal{O}(\beta) \times (\mathcal{O}(\frac{1}{\beta M}) + \mathcal{O}(\beta)) \times \mathcal{O}(\beta) = \mathcal{O}(\frac{\beta}{M}) + \mathcal{O}(\beta^3)$ . So, their product is in the order of  
 491  $(\mathcal{O}(\frac{\alpha}{\beta^2} \frac{1}{M}) + \mathcal{O}(\beta)) \times (\mathcal{O}(\frac{\beta}{M}) + \mathcal{O}(\beta^3)) = \mathcal{O}(\frac{\alpha}{\beta} \frac{1}{M^2}) + \mathcal{O}(\frac{\beta^2}{M}) + \mathcal{O}(\frac{\alpha\beta}{M}) + \mathcal{O}(\beta^4) = \mathcal{O}(\frac{\beta^2}{M}) + \mathcal{O}(\beta^4)$ .  
 492 The last term is in the order of  $\frac{\beta}{M}$ . Therefore, the above inequality implies that

$$\mathbb{E}\|\tilde{\theta}^{(m)} - \theta^*\|^2 \leq \mathcal{O}(mD^m) + \mathcal{O}(\beta^4) + \mathcal{O}(\frac{\beta}{M}).$$

493 Next, we compute the sample complexity for achieving  $\mathbb{E}\|\tilde{\theta}^{(m)} - \theta^*\|^2 \leq \epsilon$ . The above convergence  
 494 rate implies that, for sufficiently small  $\beta$  and sufficiently large  $M$ , there always exists constants  
 495  $I_1, I_2, I_3$  such that

$$\mathbb{E}\|\tilde{\theta}^{(m)} - \theta^*\|^2 \leq mD^m I_1 + \beta^4 I_2 + \frac{\beta}{M} I_3.$$

496 We require

- 497 (i)  $\beta^4 I_2 \leq \epsilon/3 \Rightarrow \beta \leq I_2^{1/4} \epsilon^{1/4} = \mathcal{O}(\epsilon^{1/4})$ .
- 498 (ii)  $\frac{\beta}{M} I_3 \leq \epsilon/3 \Rightarrow M \geq \mathcal{O}(\frac{\beta}{\epsilon})$ .
- 499 (iii)  $mD^m I_1 \leq \epsilon/3$ . We notice that this inequality implies  $D^m I_1 \leq \epsilon/(3m)$ .

500 We choose  $m = \mathcal{O}(\log \epsilon^{-1})$  so that  $m \leq \mathcal{O}(\log \epsilon^{-2})$ . Using the upper bound of  $m$ , the requirement  
 501 in (iii) suffices to require that  $D^m \leq \mathcal{O}(\epsilon/\log \epsilon^{-2})$ , which further implies that  $m \geq \mathcal{O}(\log \epsilon^{-1} +$   
 502  $\log \log \epsilon^{-2})/\log D^{-1} = \mathcal{O}(\log \epsilon^{-1})$  (note that  $D < 1$ ). Hence, it is valid to choose  $m = \mathcal{O}(\log \epsilon^{-1})$ .  
 503 Also, since  $\alpha = \mathcal{O}(\beta^{2/3})$ , then  $D \leq 1$  requires that  $M \geq \mathcal{O}(\beta^{-3/2})$ , which combines with (ii)  
 504 further requires that

$$M \geq \max\{\mathcal{O}(\frac{\beta}{\epsilon}), \mathcal{O}(\beta^{-3/2})\}.$$

505 Let  $\mathcal{O}(\frac{\beta}{\epsilon})$  and  $\mathcal{O}(\beta^{-3/2})$  be of the same order, i.e.,  $\beta = \mathcal{O}(\epsilon^{2/5})$ , which satisfies (i). So overall we  
 506 require that  $M \geq \mathcal{O}(\epsilon^{-3/5})$ , which leads to the sample complexity

$$mM \geq \mathcal{O}(\epsilon^{-3/5} \log \epsilon^{-1}).$$

## 507 C Proof of Corollary 3.2

508 **Corollary C.1.** *Under the same assumptions as those of Theorem 3.1, choose the learning rates  $\alpha, \beta$*   
 509 *and the batch size  $M$  such that all requirements of Theorem 3.1 are satisfied. Then, the following*  
 510 *refined bound holds.*

$$\begin{aligned} & \mathbb{E}\|\tilde{z}^{(m)}\|^2 \\ & \leq F^m \cdot \mathbb{E}\|\tilde{z}^{(0)}\|^2 + \frac{D^m - F^m}{D - F} \cdot \mathbb{E}\|\tilde{\theta}^{(0)} - \theta^*\|^2 + \frac{\frac{D^m - F^m}{D - F} - \frac{E^m - F^m}{E - F}}{D - E} \mathbb{E}\|\tilde{z}^{(0)}\|^2 \\ & \quad + \frac{1}{1 - F} \frac{1}{1 - D} \frac{1152}{\lambda_{\hat{A}}^2} \frac{\rho_{\max}^2 \gamma^2}{\lambda_C^2} \left( \frac{\alpha^2}{\beta^2} \cdot C_3 + \beta \cdot C_4 \right) \left[ \frac{1}{\beta M} + \beta \cdot 20 + \frac{\alpha^2}{\beta^2} \cdot 20 \gamma^2 \rho_{\max}^2 \left( 1 + \frac{2}{\lambda_C} \right) \cdot \left( \rho_{\max} \frac{1 + \gamma}{\min |\lambda(C)|} \right)^2 \right] \\ & \quad \times \left[ \beta \cdot \frac{24}{\lambda_C} H_{VR}^2 + \frac{\alpha^2}{\beta^2} \cdot \left( 1 + \frac{2}{\lambda_C} \right) \cdot \frac{2}{\lambda_C} \left( \rho_{\max} \frac{1 + \gamma}{\min |\lambda(C)|} \right)^2 G_{VR}^2 \right] \\ & \quad + \frac{1}{1 - F} \frac{1}{1 - D} \left[ \frac{\beta}{M} \cdot \left( \frac{80}{\lambda_C} K_2 + C_4 \frac{600}{\lambda_C} \frac{K_1}{\lambda_{\hat{A}}} \right) + \frac{\alpha^2}{\beta^2} \frac{1}{M} \cdot \left( \frac{80}{\lambda_C} \left( \rho_{\max} \frac{1 + \gamma}{\min |\lambda(C)|} \right)^2 K_1 \left( 1 + \frac{2}{\lambda_C} \right) + C_3 \frac{600}{\lambda_C} \frac{K_1}{\lambda_{\hat{A}}} \right) \right]. \end{aligned}$$

511 *where  $K_1$  is specified in eq.(26) in Lemma E.1,  $K_2$  is specified in eq.(32) in Lemma E.2,  $D$  and  $E$*   
 512 *are specified in eq.(18) and eq.(19) in Lemma D.4.*

513 *Proof.* See Lemma D.5. Next, we derive its asymptotic upper bound under the setting  $\beta = \mathcal{O}(\alpha^{2/3})$ .  
 514 We note that all the conditions of Theorem 3.1 on the learning rates  $\alpha, \beta$  and the batch size  $M$  can  
 515 be satisfied with a sufficiently small  $\alpha$  in this setting. The first three terms are in the order of  $D^m$   
 516 (because  $D > E, D > F$ ). Here we mainly discuss the order of the fourth and fifth term in the above  
 517 bound, and note that this term is a product of three brackets. Since we set  $\beta = \mathcal{O}(\alpha^{2/3})$ , the first  
 518 bracket of this product is in the order of  $\mathcal{O}(\beta)$ , and the second bracket of this product is in the order  
 519 of  $\mathcal{O}(\frac{1}{\beta M}) + \mathcal{O}(\beta)$ . The last bracket of this product is in the order of  $\mathcal{O}(\beta)$ . Therefore, the fourth  
 520 term in the above bound is in the order of  $\mathcal{O}(\frac{\beta}{M}) + \mathcal{O}(\beta^3)$ . Also, the last term of this upper bound is  
 521 in the order of  $\mathcal{O}(\frac{\beta}{M})$ . Overall, we can obtain that

$$\mathbb{E}\|\tilde{z}^{(m)}\|^2 = \mathcal{O}(D^m) + \mathcal{O}(\frac{\beta}{M}) + \mathcal{O}(\beta^3).$$

522 By following the same proof logic of Theorem 3.1, we obtain the desired complexity result.

523 □

## 524 D Key Lemmas for Proving Theorem 3.1

525 **Lemma D.1** (Preliminary Bound for  $\sum_{t=0}^{M-1} \mathbb{E}_{m,0} \|\theta_t^{(m)} - \theta^*\|^2$ ). *Under the same assumptions as*  
 526 *those of Theorem 3.1, choose the learning rate  $\alpha$  such that*

$$\alpha \leq \min \left\{ \frac{1}{5\lambda_{\hat{A}}}, \frac{\lambda_{\hat{A}}}{60} / \left[ (1 + \gamma)^2 \rho_{\max}^2 \left( 1 + \frac{\gamma \rho_{\max}}{\min |\lambda(C)|} \right)^2 \right] \right\}. \quad (11)$$

527 *Then, the following preliminary bound holds, where  $K_1$  is specified in eq.(26) in Lemma E.1.*

$$\begin{aligned} & \frac{\lambda_{\hat{A}}}{6} \alpha \sum_{t=0}^{M-1} \mathbb{E}_{m,0} \|\theta_t^{(m)} - \theta^*\|^2 \\ & \leq \left[ 1 + \alpha^2 M \cdot 5(1 + \gamma)^2 \rho_{\max}^2 \left( 1 + \frac{\gamma \rho_{\max}}{\min |\lambda(C)|} \right)^2 \right] \mathbb{E}_{m,0} \|\tilde{\theta}^{(m-1)} - \theta^*\|^2 + \alpha^2 \cdot 5K_1 \\ & \quad + \alpha \cdot \frac{2\rho_{\max}^2 \gamma^2}{\lambda_{\hat{A}}} \sum_{t=0}^{M-1} \mathbb{E}_{m,0} \|z_t^{(m)}\|^2 + \alpha^2 M \cdot 5\gamma^2 \rho_{\max}^2 \mathbb{E}_{m,0} \|\tilde{z}^{(m-1)}\|^2. \end{aligned}$$

*Proof.* Based on the update rule of VRTDC for i.i.d. samples, we obtain that

$$\theta_{t+1}^{(m)} = \Pi_{R_\theta} [\theta_t^{(m)} + \alpha [G_t^{(m)}(\theta_t^{(m)}, z_t^{(m)}) - G_t^{(m)}(\tilde{\theta}^{(m-1)}, \tilde{z}^{(m-1)}) + G^{(m)}(\tilde{\theta}^{(m-1)}, \tilde{z}^{(m-1)})]].$$



528 The above update rule further implies that

$$\begin{aligned}
& \|\theta_{t+1}^{(m)} - \theta^*\|^2 \\
& \stackrel{(i)}{\leq} \|\theta_t^{(m)} - \theta^* + \alpha[G_t^{(m)}(\theta_t^{(m)}, z_t^{(m)}) - G_t^{(m)}(\tilde{\theta}^{(m-1)}, \tilde{z}^{(m-1)}) + G^{(m)}(\tilde{\theta}^{(m-1)}, \tilde{z}^{(m-1)})]\|^2 \\
& = \|\theta_t^{(m)} - \theta^*\|^2 + \alpha^2 \|G_t^{(m)}(\theta_t^{(m)}, z_t^{(m)}) - G_t^{(m)}(\tilde{\theta}^{(m-1)}, \tilde{z}^{(m-1)}) + G^{(m)}(\tilde{\theta}^{(m-1)}, \tilde{z}^{(m-1)})\|^2 \\
& \quad + 2\alpha \langle \theta_t^{(m)} - \theta^*, G_t^{(m)}(\theta_t^{(m)}, z_t^{(m)}) - G_t^{(m)}(\tilde{\theta}^{(m-1)}, \tilde{z}^{(m-1)}) + G^{(m)}(\tilde{\theta}^{(m-1)}, \tilde{z}^{(m-1)}) \rangle, \quad (12)
\end{aligned}$$

529 where (i) uses the assumption that  $R_\theta \geq \|\theta^*\|$  (i.e.,  $\theta^*$  is in the ball with radius  $R_\theta$ ) and the fact  
530 that  $\Pi_{R_\theta}$  is 1-Lipschitz. Then, we take the expectation  $\mathbb{E}_{m,0}$  on both sides. In particular, an upper  
531 bound for the second variance term is given in Lemma E.1. Next, we bound the last term. Note  
532 that  $\theta_t^{(m)} \in \mathcal{F}_{m,t-1}$  by the definition of the given filtration. Also, the i.i.d. sampling implies that  
533  $\mathbb{E}_{m,t-1}[-G_t^{(m)}(\tilde{\theta}^{(m-1)}, \tilde{z}^{(m-1)}) + G^{(m)}(\tilde{\theta}^{(m-1)}, \tilde{z}^{(m-1)})] = 0$ . Therefore, for the last term of the  
534 above equation, we obtain that

$$\begin{aligned}
& \mathbb{E}_{m,0} \langle \theta_t^{(m)} - \theta^*, G_t^{(m)}(\theta_t^{(m)}, z_t^{(m)}) - G_t^{(m)}(\tilde{\theta}^{(m-1)}, \tilde{z}^{(m-1)}) + G^{(m)}(\tilde{\theta}^{(m-1)}, \tilde{z}^{(m-1)}) \rangle \\
& = \mathbb{E}_{m,0} \langle \theta_t^{(m)} - \theta^*, \mathbb{E}_{m,t-1}[G_t^{(m)}(\theta_t^{(m)}, z_t^{(m)}) - G_t^{(m)}(\tilde{\theta}^{(m-1)}, \tilde{z}^{(m-1)}) + G^{(m)}(\tilde{\theta}^{(m-1)}, \tilde{z}^{(m-1)})] \rangle \\
& = \mathbb{E}_{m,0} \langle \theta_t^{(m)} - \theta^*, \mathbb{E}_{m,t-1} G_t^{(m)}(\theta_t^{(m)}, z_t^{(m)}) \rangle \\
& \quad + \mathbb{E}_{m,0} \langle \theta_t^{(m)} - \theta^*, \mathbb{E}_{m,t-1}[-G_t^{(m)}(\tilde{\theta}^{(m-1)}, \tilde{z}^{(m-1)}) + G^{(m)}(\tilde{\theta}^{(m-1)}, \tilde{z}^{(m-1)})] \rangle \\
& = \mathbb{E}_{m,0} \langle \theta_t^{(m)} - \theta^*, \mathbb{E}_{m,t-1} G_t^{(m)}(\theta_t^{(m)}, z_t^{(m)}) \rangle \\
& = \mathbb{E}_{m,0} \langle \theta_t^{(m)} - \theta^*, \mathbb{E}_{m,t-1}[\hat{A}_t^{(m)} \theta_t^{(m)} + \hat{b}_t^{(m)} + B_t^{(m)} z_t^{(m)}] \rangle \\
& = \mathbb{E}_{m,0} \langle \theta_t^{(m)} - \theta^*, \mathbb{E}_{m,t-1}[\hat{A}_t^{(m)} \theta_t^{(m)} + \hat{b}_t^{(m)}] \rangle + \mathbb{E}_{m,0} \langle \theta_t^{(m)} - \theta^*, B_t^{(m)} z_t^{(m)} \rangle. \quad (13)
\end{aligned}$$

535 Note that  $\mathbb{E}_{m,t-1} \hat{A}_t^{(m)} = \hat{A}$  and  $\hat{A}\theta^* + \hat{b} = 0$ , the first term of eq. (13) above can be simplified as

$$\begin{aligned}
& \mathbb{E}_{m,0} \langle \theta_t^{(m)} - \theta^*, \mathbb{E}_{m,t-1}[\hat{A}_t^{(m)} \theta_t^{(m)} + \hat{b}_t^{(m)}] \rangle = \mathbb{E}_{m,0} \langle \theta_t^{(m)} - \theta^*, \hat{A} \theta_t^{(m)} + \hat{b} \rangle \\
& = \mathbb{E}_{m,0} \langle \theta_t^{(m)} - \theta^*, \hat{A}(\theta_t^{(m)} - \theta^*) + \hat{A}\theta^* + \hat{b} \rangle \\
& = \mathbb{E}_{m,0} \langle \theta_t^{(m)} - \theta^*, \hat{A}(\theta_t^{(m)} - \theta^*) \rangle \\
& \leq -\frac{\lambda_{\hat{A}}}{2} \mathbb{E}_{m,0} \|\theta_t^{(m)} - \theta^*\|^2,
\end{aligned}$$

536 where the last inequality uses the property of negative definite matrix  $(\theta - \theta^*)^T \hat{A}(\theta - \theta^*) \leq$   
537  $\lambda_{\max}(\hat{A}) \|\theta - \theta^*\|^2$  and the definition that  $\lambda_{\hat{A}} := -\lambda_{\max}(\hat{A} + \hat{A}^\top)$ . The last term of eq. (13) can be  
538 bounded using the inequality  $2\langle u, v \rangle \leq \|u\|^2 + \|v\|^2$  as

$$\mathbb{E}_{m,0} \langle \theta_t^{(m)} - \theta^*, B_t^{(m)} z_t^{(m)} \rangle \leq \frac{1}{2} \cdot \frac{\lambda_{\hat{A}}}{2} \mathbb{E}_{m,0} \|\theta_t^{(m)} - \theta^*\|^2 + \frac{1}{2} \cdot \frac{2}{\lambda_{\hat{A}}} \rho_{\max}^2 \gamma^2 \cdot \mathbb{E}_{m,0} \|z_t^{(m)}\|^2,$$

539 where we have used the fact that  $\|B_t^{(m)}\| \leq \rho_{\max} \gamma$ . Substituting these inequalities into eq. (13), we  
540 obtain that

$$\begin{aligned}
& \mathbb{E}_{m,0} \langle \theta_t^{(m)} - \theta^*, G_t^{(m)}(\theta_t^{(m)}, z_t^{(m)}) - G_t^{(m)}(\tilde{\theta}^{(m-1)}, \tilde{z}^{(m-1)}) + G^{(m)}(\tilde{\theta}^{(m-1)}, \tilde{z}^{(m-1)}) \rangle \\
& \leq -\frac{\lambda_{\hat{A}}}{4} \mathbb{E}_{m,0} \|\theta_t^{(m)} - \theta^*\|^2 + \frac{\rho_{\max}^2 \gamma^2}{\lambda_{\hat{A}}} \mathbb{E}_{m,0} \|z_t^{(m)}\|^2.
\end{aligned}$$

541 Substituting the above inequality into eq. (12) yields that

$$\begin{aligned}
& \mathbb{E}_{m,0} \|\theta_{t+1}^{(m)} - \theta^*\|^2 \\
& \leq \mathbb{E}_{m,0} \|\theta_t^{(m)} - \theta^*\|^2 + \alpha \left[ -\frac{\lambda_{\hat{A}}}{4} \mathbb{E}_{m,0} \|\theta_t^{(m)} - \theta^*\|^2 + \frac{\rho_{\max}^2 \gamma^2}{\lambda_{\hat{A}}} \mathbb{E}_{m,0} \|z_t^{(m)}\|^2 \right] \\
& \quad + \alpha^2 \left[ 5(1 + \gamma)^2 \rho_{\max}^2 \left( 1 + \frac{\gamma \rho_{\max}}{\min |\lambda(C)|} \right)^2 (\mathbb{E}_{m,0} \|\theta_t^{(m)} - \theta^*\|^2 + \mathbb{E}_{m,0} \|\tilde{\theta}^{(m-1)} - \theta^*\|^2) \right]
\end{aligned}$$

$$\begin{aligned}
& + \alpha^2 [5\gamma^2 \rho_{\max}^2 (\mathbb{E}_{m,0} \|z_t^{(m)}\|^2 + \mathbb{E}_{m,0} \|\tilde{z}^{(m-1)}\|^2) + \frac{5K_1}{M}] \\
& = \mathbb{E}_{m,0} \|\theta_t^{(m)} - \theta^*\|^2 - \left(\frac{\lambda_{\hat{A}}}{4} \alpha - \alpha^2 \cdot 5(1+\gamma)^2 \rho_{\max}^2 \left(1 + \frac{\gamma \rho_{\max}}{\min |\lambda(C)|}\right)^2\right) \mathbb{E}_{m,0} \|\theta_t^{(m)} - \theta^*\|^2 \\
& \quad + \alpha^2 \cdot 5(1+\gamma)^2 \rho_{\max}^2 \left(1 + \frac{\gamma \rho_{\max}}{\min |\lambda(C)|}\right)^2 \mathbb{E}_{m,0} \|\tilde{\theta}^{(m-1)} - \theta^*\|^2 + \frac{\alpha^2}{M} \cdot 5K_1 \\
& \quad + \left(\alpha \cdot \frac{\rho_{\max}^2 \gamma^2}{\lambda_{\hat{A}}} + \alpha^2 \cdot 5\gamma^2 \rho_{\max}^2\right) \mathbb{E}_{m,0} \|z_t^{(m)}\|^2 + \alpha^2 \cdot 5\gamma^2 \rho_{\max}^2 \mathbb{E}_{m,0} \|\tilde{z}^{(m-1)}\|^2.
\end{aligned}$$

Summing the above inequality over  $t = 0, \dots, M-1$  yields that

$$\begin{aligned}
& \left(\frac{\lambda_{\hat{A}}}{4} \alpha - \alpha^2 \cdot 5(1+\gamma)^2 \rho_{\max}^2 \left(1 + \frac{\gamma \rho_{\max}}{\min |\lambda(C)|}\right)^2\right) \sum_{t=0}^{M-1} \mathbb{E}_{m,0} \|\theta_t^{(m)} - \theta^*\|^2 \\
& \leq \left[1 + \alpha^2 M \cdot 5(1+\gamma)^2 \rho_{\max}^2 \left(1 + \frac{\gamma \rho_{\max}}{\min |\lambda(C)|}\right)^2\right] \mathbb{E}_{m,0} \|\tilde{\theta}^{(m-1)} - \theta^*\|^2 + \alpha^2 \cdot 5K_1 \\
& \quad + \left(\alpha \cdot \frac{\rho_{\max}^2 \gamma^2}{\lambda_{\hat{A}}} + \alpha^2 \cdot 5\gamma^2 \rho_{\max}^2\right) \sum_{t=0}^{M-1} \mathbb{E}_{m,0} \|z_t^{(m)}\|^2 + \alpha^2 M \cdot 5\gamma^2 \rho_{\max}^2 \mathbb{E}_{m,0} \|\tilde{z}^{(m-1)}\|^2.
\end{aligned}$$

To further simplify the above inequality, we choose a sufficiently small  $\alpha$  such that  $\alpha^2 \cdot 5\gamma^2 \rho_{\max}^2 \leq \alpha \cdot \frac{\rho_{\max}^2 \gamma^2}{\lambda_{\hat{A}}}$  and  $\frac{\lambda_{\hat{A}}}{4} \alpha - \alpha^2 \cdot 5(1+\gamma)^2 \rho_{\max}^2 \left(1 + \frac{\gamma \rho_{\max}}{\min |\lambda(C)|}\right)^2 \geq \frac{\lambda_{\hat{A}}}{6} \alpha$ . Then, the above inequality can be rewritten as

$$\begin{aligned}
& \frac{\lambda_{\hat{A}}}{6} \alpha \sum_{t=0}^{M-1} \mathbb{E}_{m,0} \|\theta_t^{(m)} - \theta^*\|^2 \\
& \leq \left[1 + \alpha^2 M \cdot 5(1+\gamma)^2 \rho_{\max}^2 \left(1 + \frac{\gamma \rho_{\max}}{\min |\lambda(C)|}\right)^2\right] \mathbb{E}_{m,0} \|\tilde{\theta}^{(m-1)} - \theta^*\|^2 + \alpha^2 \cdot 5K_1 \\
& \quad + \alpha \cdot \frac{2\rho_{\max}^2 \gamma^2}{\lambda_{\hat{A}}} \sum_{t=0}^{M-1} \mathbb{E}_{m,0} \|z_t^{(m)}\|^2 + \alpha^2 M \cdot 5\gamma^2 \rho_{\max}^2 \mathbb{E}_{m,0} \|\tilde{z}^{(m-1)}\|^2.
\end{aligned}$$

□

**Lemma D.2** (Preliminary bound for  $\mathbb{E}\|\tilde{z}^{(m)}\|^2$ ). *Under the same assumptions as those of Theorem 3.1, choose the learning rate  $\beta$  and the batch size  $M$  such that  $\beta < 1$  and  $M\beta > \frac{4}{\lambda_C}$ . Then, the following preliminary bound holds.*

$$\begin{aligned}
\mathbb{E}\|\tilde{z}^{(m)}\|^2 & \leq \left(\frac{1}{M\beta} \cdot \frac{2}{\lambda_C}\right)^m \mathbb{E}\|\tilde{z}^{(0)}\|^2 \\
& \quad + 2 \cdot \left[\beta \cdot \frac{24}{\lambda_C} H_{VR}^2 + \frac{\alpha^2}{\beta^2} \cdot \left(1 + \frac{2}{\lambda_C}\right) \cdot \frac{2}{\lambda_C} \left(\rho_{\max} \frac{1+\gamma}{\min |\lambda(C)|}\right)^2 G_{VR}^2\right].
\end{aligned}$$

where  $H_{VR}, G_{VR}$  is defined in Lemma J.5 and Lemma J.4.

*Proof.* First, based on the update rule of  $w_t^{(m)}$ , we have

$$w_{t+1}^{(m)} = \Pi_{R_w} [w_t^{(m)} + A_t^{(m)} \theta_t^{(m)} + b_t^{(m)} + C_t^{(m)} w_t^{(m)}],$$

which further implies the following one-step update rule of the tracking error  $z_t^{(m)}$ .

$$z_{t+1}^{(m)} = \Pi_{R_w} [w_t^{(m)} + A_t^{(m)} \theta_t^{(m)} + b_t^{(m)} + C_t^{(m)} w_t^{(m)}] + C^{-1}(b + A(\tilde{\theta}^{(m)})).$$

Then, its square norm can be bounded as

$$\begin{aligned}
\|z_{t+1}^{(m)}\|^2 & \stackrel{(i)}{\leq} \|z_t^{(m)}\|^2 + \beta [H_t^{(m)}(\theta_t^{(m)}, z_t^{(m)}) - H_t^{(m)}(\tilde{\theta}^{(m-1)}, \tilde{z}^{(m-1)}) + H^{(m)}(\tilde{\theta}^{(m-1)}, \tilde{z}^{(m-1)})] \\
& \quad + C^{-1} A(\theta_{t+1}^{(m)} - \theta_t^{(m)})\|^2
\end{aligned}$$

$$\begin{aligned}
&= \|z_t^{(m)}\|^2 + 2\beta^2 \|H_t^{(m)}(\theta_t^{(m)}, z_t^{(m)}) - H_t^{(m)}(\tilde{\theta}^{(m-1)}, \tilde{z}^{(m-1)}) + H^{(m)}(\tilde{\theta}^{(m-1)}, \tilde{z}^{(m-1)})\|^2 \\
&\quad + 2\|C^{-1}A(\theta_{t+1}^{(m)} - \theta_t^{(m)})\|^2 \\
&\quad + 2\beta \langle z_t^{(m)}, H_t^{(m)}(\theta_t^{(m)}, z_t^{(m)}) - H_t^{(m)}(\tilde{\theta}^{(m-1)}, \tilde{z}^{(m-1)}) + H^{(m)}(\tilde{\theta}^{(m-1)}, \tilde{z}^{(m-1)}) \rangle \\
&\quad + 2\langle z_t^{(m)}, C^{-1}A(\theta_{t+1}^{(m)} - \theta_t^{(m)}) \rangle,
\end{aligned} \tag{14}$$

where (i) uses the assumption that  $R_w \geq 2\|C^{-1}\| \|A\| R_\theta$  (i.e.,  $C^{-1}(b + A\theta_t^{(m)})$  is in the ball with radius  $R_w$ ) and the fact that  $\Pi_{R_w}$  is 1-Lipschitz. For the last term of eq. (14), it can be bounded as

$$2\langle z_t^{(m)}, C^{-1}A(\theta_{t+1}^{(m)} - \theta_t^{(m)}) \rangle \leq \frac{\lambda_C}{2} \beta \|z_t^{(m)}\|^2 + \frac{2}{\lambda_C} \frac{1}{\beta} \|C^{-1}A(\theta_{t+1}^{(m)} - \theta_t^{(m)})\|^2.$$

554 Substituting the above inequality, Lemma J.4 and Lemma J.5 into eq. (14), we obtain that

$$\begin{aligned}
\|z_{t+1}^{(m)}\|^2 &\leq \|z_t^{(m)}\|^2 + 2\beta^2 H_{\text{VR}}^2 + \left(\alpha^2 + \frac{2\alpha^2}{\lambda_C} \frac{1}{\beta}\right) \cdot 2\left(\rho_{\max} \frac{1+\gamma}{\min |\lambda(C)|}\right)^2 G_{\text{VR}}^2 + \frac{\lambda_C}{2} \beta \|z_t^{(m)}\|^2 \\
&\quad + 2\beta \langle z_t^{(m)}, H_t^{(m)}(\theta_t^{(m)}, z_t^{(m)}) - H_t^{(m)}(\tilde{\theta}^{(m-1)}, \tilde{z}^{(m-1)}) + H^{(m)}(\tilde{\theta}^{(m-1)}, \tilde{z}^{(m-1)}) \rangle.
\end{aligned} \tag{15}$$

557 Next, we bound the inner product term in the above inequality. Notice that  $z_t^{(m)} \in \mathcal{F}_{m,t-1}$  and by  
558 i.i.d. sampling we have  $\mathbb{E}_{m,t-1} \bar{A}_t^{(m)} = \bar{A}$ . Therefore,

$$\begin{aligned}
&\mathbb{E}_{m,0} \langle z_t^{(m)}, H_t^{(m)}(\theta_t^{(m)}, z_t^{(m)}) - H_t^{(m)}(\tilde{\theta}^{(m-1)}, \tilde{z}^{(m-1)}) + H^{(m)}(\tilde{\theta}^{(m-1)}, \tilde{z}^{(m-1)}) \rangle \\
&= \mathbb{E}_{m,0} \langle z_t^{(m)}, H_t^{(m)}(\theta_t^{(m)}, z_t^{(m)}) \rangle \\
&= \mathbb{E}_{m,0} \langle z_t^{(m)}, \bar{A}_t^{(m)} \theta_t^{(m)} + \bar{b}_t^{(m)} + C_t^{(m)} z_t^{(m)} \rangle \\
&= \mathbb{E}_{m,0} \langle z_t^{(m)}, \mathbb{E}_{m,t-1}(\bar{A}_t^{(m)}) \theta_t^{(m)} + \mathbb{E}_{m,t-1}(\bar{b}_t^{(m)}) \rangle + \mathbb{E}_{m,0} \langle z_t^{(m)}, \mathbb{E}_{m,t-1}(C_t^{(m)} - C) z_t^{(m)} \rangle + \mathbb{E}_{m,0} \langle z_t^{(m)}, C z_t^{(m)} \rangle \\
&= \mathbb{E}_{m,0} \langle z_t^{(m)}, C z_t^{(m)} \rangle \\
&\leq -\frac{\lambda_C}{2} \mathbb{E}_{m,0} \|z_t^{(m)}\|^2
\end{aligned}$$

557 where the last inequality utilizes the negative definiteness of  $C$  (recall that  $\lambda_C := -\lambda_{\max}(C + C^\top)$ ).  
558 Substituting the above inequality into eq. (15) (after taking expectation) yields that

$$\begin{aligned}
\mathbb{E}_{m,0} \|z_{t+1}^{(m)}\|^2 &\leq \mathbb{E}_{m,0} \|z_t^{(m)}\|^2 + 2\beta^2 H_{\text{VR}}^2 + \left(\alpha^2 + \frac{2\alpha^2}{\lambda_C} \frac{1}{\beta}\right) \cdot 2\left(\rho_{\max} \frac{1+\gamma}{\min |\lambda(C)|}\right)^2 G_{\text{VR}}^2 \\
&\quad - \frac{\lambda_C}{2} \beta \mathbb{E}_{m,0} \|z_t^{(m)}\|^2.
\end{aligned}$$

559 Summing the above inequality over one batch yields that

$$\begin{aligned}
\mathbb{E}_{m,0} \|z_M^{(m)}\|^2 &\leq \mathbb{E}_{m,0} \|z_0^{(m)}\|^2 + 2\beta^2 M H_{\text{VR}}^2 + \left(\alpha^2 + \frac{2\alpha^2}{\lambda_C} \frac{1}{\beta}\right) M \cdot 2\left(\rho_{\max} \frac{1+\gamma}{\min |\lambda(C)|}\right)^2 G_{\text{VR}}^2 \\
&\quad - \frac{\lambda_C}{2} \beta \sum_{t=0}^{M-1} \mathbb{E}_{m,0} \|z_t^{(m)}\|^2.
\end{aligned}$$

560 Re-arranging the above inequality and omitting  $\mathbb{E}_{m,0} \|z_M^{(m)}\|^2$  further yields that

$$\frac{\lambda_C}{2} \beta M \mathbb{E}_{m,0} \|\tilde{z}^{(m)}\|^2 \leq \|\tilde{z}^{(m-1)}\|^2 + 2\beta^2 M H_{\text{VR}}^2 + \left(\alpha^2 + \frac{2\alpha^2}{\lambda_C} \frac{1}{\beta}\right) M \cdot 2\left(\rho_{\max} \frac{1+\gamma}{\min |\lambda(C)|}\right)^2 G_{\text{VR}}^2.$$

561 Dividing  $\frac{\lambda_C}{2} \beta M$  on both sides of the above inequality, we obtain the following one-batch bound.

$$\mathbb{E} \|\tilde{z}^{(m)}\|^2 \leq \frac{1}{M\beta} \cdot \frac{2}{\lambda_C} \mathbb{E} \|\tilde{z}^{(m-1)}\|^2 + \beta \cdot \frac{4}{\lambda_C} H_{\text{VR}}^2 + \left(\frac{\alpha^2}{\beta} + \frac{2}{\lambda_C} \frac{\alpha^2}{\beta^2}\right) \cdot \frac{4}{\lambda_C} \left(\rho_{\max} \frac{1+\gamma}{\min |\lambda(C)|}\right)^2 G_{\text{VR}}^2.$$

562 Finally, we recursively unroll the above inequality and obtain

$$\begin{aligned}\mathbb{E}\|\tilde{z}^{(m)}\|^2 &\leq \left(\frac{1}{M\beta} \cdot \frac{2}{\lambda_C}\right)^m \mathbb{E}\|\tilde{z}^{(0)}\|^2 \\ &\quad + \frac{1}{1 - \frac{1}{M\beta} \cdot \frac{2}{\lambda_C}} \left[ \beta \cdot \frac{24}{\lambda_C} H_{\text{VR}}^2 + \left(\frac{\alpha^2}{\beta} + \frac{2}{\lambda_C} \frac{\alpha^2}{\beta^2}\right) \cdot \frac{2}{\lambda_C} \left(\rho_{\max} \frac{1+\gamma}{\min|\lambda(C)|}\right)^2 G_{\text{VR}}^2 \right].\end{aligned}$$

563 To further simplify the above inequality, we assume  $\beta < 1$  and  $M\beta > \frac{4}{\lambda_C}$ . Then, we have

$$\begin{aligned}\mathbb{E}\|\tilde{z}^{(m)}\|^2 &\leq \left(\frac{1}{M\beta} \cdot \frac{2}{\lambda_C}\right)^m \mathbb{E}\|\tilde{z}^{(0)}\|^2 \\ &\quad + 2 \cdot \left[ \beta \cdot \frac{24}{\lambda_C} H_{\text{VR}}^2 + \frac{\alpha^2}{\beta^2} \cdot \left(1 + \frac{2}{\lambda_C}\right) \cdot \frac{2}{\lambda_C} \left(\rho_{\max} \frac{1+\gamma}{\min|\lambda(C)|}\right)^2 G_{\text{VR}}^2 \right].\end{aligned}$$

564

□

565 **Lemma D.3** (Preliminary Bound for  $\sum_{t=0}^{M-1} \|z_t^{(m)}\|^2$ ). *Under the same assumptions as those of*  
566 *Theorem 3.1, choose the learning rate  $\beta$  and the batch size  $M$  such that  $\beta < 1$  and*

$$\frac{\lambda_C}{2} \beta - 10\beta^2 - 10\gamma^2 \rho_{\max}^2 \left(\alpha^2 + \frac{2\alpha^2}{\lambda_C} \frac{1}{\beta}\right) \cdot \left(\rho_{\max} \frac{1+\gamma}{\min|\lambda(C)|}\right)^2 \geq \frac{\lambda_C}{3} \beta. \quad (16)$$

567 Then the following preliminary bound holds.

$$\begin{aligned}&\frac{\lambda_C}{3} \beta \sum_{t=0}^{M-1} \mathbb{E}_{m,0} \|z_t^{(m)}\|^2 \\ &\leq \left[ 1 + \left[ 10\beta^2 + 10\gamma^2 \rho_{\max}^2 \left(1 + \frac{2}{\lambda_C}\right) \cdot \left(\rho_{\max} \frac{1+\gamma}{\min|\lambda(C)|}\right)^2 \frac{\alpha^2}{\beta} \right] M \right] \mathbb{E}_{m,0} \|\tilde{z}^{(m-1)}\|^2 \\ &\quad + 10(1+\gamma)^2 \rho_{\max}^2 \cdot \left[ \left(1 + \frac{\gamma \rho_{\max}}{\min|\lambda(C)|}\right)^2 \left(1 + \frac{2}{\lambda_C}\right) \cdot \left(\rho_{\max} \frac{1+\gamma}{\min|\lambda(C)|}\right)^2 \frac{\alpha^2}{\beta} \right. \\ &\quad \left. + \left(1 + \frac{1}{\min|\lambda(C)|}\right)^2 \beta^2 \right] \left( \sum_{t=0}^{M-1} \mathbb{E}_{m,0} \|\theta_t^{(m)} - \theta^*\|^2 + M \mathbb{E}_{m,0} \|\tilde{\theta}^{(m-1)} - \theta^*\|^2 \right) \\ &\quad + 10K_2\beta^2 + 10\left(\rho_{\max} \frac{1+\gamma}{\min|\lambda(C)|}\right)^2 K_1 \left(1 + \frac{2}{\lambda_C}\right) \frac{\alpha^2}{\beta},\end{aligned}$$

568 where  $K_1$  is specified in eq.(26) in Lemma E.1.

569 *Proof.* Following the proof of Lemma D.2, the one-step update of  $z_t^{(m)}$  implies that

$$\begin{aligned}\|z_{t+1}^{(m)}\|^2 &\leq \|z_t^{(m)}\|^2 + 2\beta^2 \|H_t^{(m)}(\theta_t^{(m)}, z_t^{(m)}) - H_t^{(m)}(\tilde{\theta}^{(m-1)}, \tilde{z}^{(m-1)}) + H^{(m)}(\tilde{\theta}^{(m-1)}, \tilde{z}^{(m-1)})\|^2 \\ &\quad + 2\|C^{-1}A(\theta_{t+1}^{(m)} - \theta_t^{(m)})\|^2 + 2\langle z_t^{(m)}, C^{-1}A(\theta_{t+1}^{(m)} - \theta_t^{(m)}) \rangle \\ &\quad + 2\beta \langle z_t^{(m)}, H_t^{(m)}(\theta_t^{(m)}, z_t^{(m)}) - H_t^{(m)}(\tilde{\theta}^{(m-1)}, \tilde{z}^{(m-1)}) + H^{(m)}(\tilde{\theta}^{(m-1)}, \tilde{z}^{(m-1)}) \rangle \\ &\leq \|z_t^{(m)}\|^2 + 2\beta^2 \|H_t^{(m)}(\theta_t^{(m)}, z_t^{(m)}) - H_t^{(m)}(\tilde{\theta}^{(m-1)}, \tilde{z}^{(m-1)}) + H^{(m)}(\tilde{\theta}^{(m-1)}, \tilde{z}^{(m-1)})\|^2 \\ &\quad + 2\|C^{-1}A(\theta_{t+1}^{(m)} - \theta_t^{(m)})\|^2 + \frac{\lambda_C}{2} \beta \|z_t^{(m)}\|^2 + \frac{2}{\lambda_C} \frac{1}{\beta} \|C^{-1}A(\theta_{t+1} - \theta_t)\|^2 \\ &\quad + 2\beta \langle z_t^{(m)}, H_t^{(m)}(\theta_t^{(m)}, z_t^{(m)}) - H_t^{(m)}(\tilde{\theta}^{(m-1)}, \tilde{z}^{(m-1)}) + H^{(m)}(\tilde{\theta}^{(m-1)}, \tilde{z}^{(m-1)}) \rangle \\ &\leq \|z_t^{(m)}\|^2 + \frac{\lambda_C}{2} \beta \|z_t^{(m)}\|^2 + 2\beta^2 \|H_t^{(m)}(\theta_t^{(m)}, z_t^{(m)}) - H_t^{(m)}(\tilde{\theta}^{(m-1)}, \tilde{z}^{(m-1)}) + H^{(m)}(\tilde{\theta}^{(m-1)}, \tilde{z}^{(m-1)})\|^2 \\ &\quad + \left(\alpha^2 + \frac{2\alpha^2}{\lambda_C} \frac{1}{\beta}\right) \cdot 2\left(\rho_{\max} \frac{1+\gamma}{\min|\lambda(C)|}\right)^2 \|G_t^{(m)}(\theta_t^{(m)}, z_t^{(m)}) \\ &\quad - G_t^{(m)}(\tilde{\theta}^{(m-1)}, \tilde{z}^{(m-1)}) + G^{(m)}(\tilde{\theta}^{(m-1)}, \tilde{z}^{(m-1)})\|^2\end{aligned}$$

$$+ 2\beta \langle z_t^{(m)}, H_t^{(m)}(\theta_t^{(m)}, z_t^{(m)}) - H_t^{(m)}(\tilde{\theta}^{(m-1)}, \tilde{z}^{(m-1)}) + H^{(m)}(\tilde{\theta}^{(m-1)}, \tilde{z}^{(m-1)}) \rangle. \quad (17)$$

570 For the last inner product term, we still have

$$\mathbb{E}_{m,0} \langle z_t^{(m)}, H_t^{(m)}(\theta_t^{(m)}, z_t^{(m)}) - H_t^{(m)}(\tilde{\theta}^{(m-1)}, \tilde{z}^{(m-1)}) + H^{(m)}(\tilde{\theta}^{(m-1)}, \tilde{z}^{(m-1)}) \rangle \leq -\frac{\lambda_C}{2} \mathbb{E}_{m,0} \|z_t^{(m)}\|^2.$$

571 Instead of bounding the variance term in eq. (17) using Lemma J.4 and Lemma J.5, we apply Lemma  
572 E.1 and Lemma E.2 to get a refined bound. Combining these together, we obtain from eq. (17) that

$$\begin{aligned} & \mathbb{E}_{m,0} \|z_{t+1}^{(m)}\|^2 \\ & \leq \mathbb{E}_{m,0} \|z_t^{(m)}\|^2 - \frac{\lambda_C}{2} \beta \mathbb{E}_{m,0} \|z_t^{(m)}\|^2 + 2\beta^2 \left[ 5(\mathbb{E}_{m,0} \|z_t^{(m)}\|^2 + \mathbb{E}_{m,0} \|\tilde{z}^{(m-1)}\|^2) + \frac{5K_2}{M} \right. \\ & \quad \left. + 5(1+\gamma)^2 \rho_{\max}^2 \left(1 + \frac{1}{\min |\lambda(C)|}\right)^2 (\mathbb{E}_{m,0} \|\theta_t^{(m)} - \theta^*\|^2 + \mathbb{E}_{m,0} \|\tilde{\theta}^{(m-1)} - \theta^*\|^2) \right] \\ & \quad + \left(\alpha^2 + \frac{2\alpha^2}{\lambda_C} \frac{1}{\beta}\right) \cdot 2 \left(\rho_{\max} \frac{1+\gamma}{\min |\lambda(C)|}\right)^2 \left[ 5\gamma^2 \rho_{\max}^2 (\mathbb{E}_{m,0} \|z_t^{(m)}\|^2 + \mathbb{E}_{m,0} \|\tilde{z}^{(m-1)}\|^2) + \frac{5K_1}{M} \right. \\ & \quad \left. + 5(1+\gamma)^2 \rho_{\max}^2 \left(1 + \frac{\gamma \rho_{\max}}{\min |\lambda(C)|}\right)^2 (\mathbb{E}_{m,0} \|\theta_t^{(m)} - \theta^*\|^2 + \mathbb{E}_{m,0} \|\tilde{\theta}^{(m-1)} - \theta^*\|^2) \right]. \end{aligned}$$

573 Re-arranging the above inequality yields that

$$\begin{aligned} & \mathbb{E}_{m,0} \|z_{t+1}^{(m)}\|^2 \\ & \leq \mathbb{E}_{m,0} \|z_t^{(m)}\|^2 - \left[ \frac{\lambda_C}{2} \beta - 10\beta^2 - 10\gamma^2 \rho_{\max}^2 \left(\alpha^2 + \frac{2\alpha^2}{\lambda_C} \frac{1}{\beta}\right) \cdot \left(\rho_{\max} \frac{1+\gamma}{\min |\lambda(C)|}\right)^2 \right] \mathbb{E}_{m,0} \|z_t^{(m)}\|^2 \\ & \quad + \left[ 10\beta^2 + 10\gamma^2 \rho_{\max}^2 \left(\alpha^2 + \frac{2\alpha^2}{\lambda_C} \frac{1}{\beta}\right) \cdot \left(\rho_{\max} \frac{1+\gamma}{\min |\lambda(C)|}\right)^2 \right] \mathbb{E}_{m,0} \|\tilde{z}^{(m-1)}\|^2 \\ & \quad + 10(1+\gamma)^2 \rho_{\max}^2 \cdot \left[ \left(1 + \frac{\gamma \rho_{\max}}{\min |\lambda(C)|}\right)^2 \left(\alpha^2 + \frac{2\alpha^2}{\lambda_C} \frac{1}{\beta}\right) \cdot \left(\rho_{\max} \frac{1+\gamma}{\min |\lambda(C)|}\right)^2 \right. \\ & \quad \left. + \left(1 + \frac{1}{\min |\lambda(C)|}\right)^2 \beta^2 \right] (\mathbb{E}_{m,0} \|\theta_t^{(m)} - \theta^*\|^2 + \mathbb{E}_{m,0} \|\tilde{\theta}^{(m-1)} - \theta^*\|^2) \\ & \quad + \frac{1}{M} \cdot [10K_2\beta^2 + 10(\rho_{\max} \frac{1+\gamma}{\min |\lambda(C)|})^2 K_1 (\alpha^2 + \frac{2\alpha^2}{\lambda_C} \frac{1}{\beta})]. \end{aligned}$$

574 Telescoping the above inequality over one batch yields that

$$\begin{aligned} & \left[ \frac{\lambda_C}{2} \beta - 10\beta^2 - 10\gamma^2 \rho_{\max}^2 \left(\alpha^2 + \frac{2\alpha^2}{\lambda_C} \frac{1}{\beta}\right) \cdot \left(\rho_{\max} \frac{1+\gamma}{\min |\lambda(C)|}\right)^2 \right] \sum_{t=0}^{M-1} \mathbb{E}_{m,0} \|z_t^{(m)}\|^2 \\ & \leq \left[ 1 + \left[ 10\beta^2 + 10\gamma^2 \rho_{\max}^2 \left(\alpha^2 + \frac{2\alpha^2}{\lambda_C} \frac{1}{\beta}\right) \cdot \left(\rho_{\max} \frac{1+\gamma}{\min |\lambda(C)|}\right)^2 \right] M \right] \mathbb{E}_{m,0} \|\tilde{z}^{(m-1)}\|^2 \\ & \quad + 10(1+\gamma)^2 \rho_{\max}^2 \cdot \left[ \left(1 + \frac{\gamma \rho_{\max}}{\min |\lambda(C)|}\right)^2 \left(\alpha^2 + \frac{2\alpha^2}{\lambda_C} \frac{1}{\beta}\right) \cdot \left(\rho_{\max} \frac{1+\gamma}{\min |\lambda(C)|}\right)^2 \right. \\ & \quad \left. + \left(1 + \frac{1}{\min |\lambda(C)|}\right)^2 \beta^2 \right] \left( \sum_{t=0}^{M-1} \mathbb{E}_{m,0} \|\theta_t^{(m)} - \theta^*\|^2 + M \mathbb{E}_{m,0} \|\tilde{\theta}^{(m-1)} - \theta^*\|^2 \right) \\ & \quad + 10K_2\beta^2 + 10(\rho_{\max} \frac{1+\gamma}{\min |\lambda(C)|})^2 K_1 (\alpha^2 + \frac{2\alpha^2}{\lambda_C} \frac{1}{\beta}). \end{aligned}$$

To further simplify the above inequality, we let  $\beta < 1$  and

$$\frac{\lambda_C}{2} \beta - 10\beta^2 - 10\gamma^2 \rho_{\max}^2 \left(\alpha^2 + \frac{2\alpha^2}{\lambda_C} \frac{1}{\beta}\right) \cdot \left(\rho_{\max} \frac{1+\gamma}{\min |\lambda(C)|}\right)^2 \geq \frac{\lambda_C}{3} \beta.$$

575 Then, we finally obtain that

$$\frac{\lambda_C}{3} \beta \sum_{t=0}^{M-1} \mathbb{E}_{m,0} \|z_t^{(m)}\|^2$$

$$\begin{aligned}
&\leq \left[ 1 + \left[ 10\beta^2 + 10\gamma^2\rho_{\max}^2 \left( 1 + \frac{2}{\lambda_C} \right) \cdot \left( \rho_{\max} \frac{1+\gamma}{\min |\lambda(C)|} \right)^2 \frac{\alpha^2}{\beta} \right] M \right] \mathbb{E}_{m,0} \|\tilde{z}^{(m-1)}\|^2 \\
&\quad + 10(1+\gamma)^2\rho_{\max}^2 \cdot \left[ \left( 1 + \frac{\gamma\rho_{\max}}{\min |\lambda(C)|} \right)^2 \left( 1 + \frac{2}{\lambda_C} \right) \cdot \left( \rho_{\max} \frac{1+\gamma}{\min |\lambda(C)|} \right)^2 \frac{\alpha^2}{\beta} \right. \\
&\quad \left. + \left( 1 + \frac{1}{\min |\lambda(C)|} \right)^2 \beta^2 \right] \left( \sum_{t=0}^{M-1} \mathbb{E}_{m,0} \|\theta_t^{(m)} - \theta^*\|^2 + M \mathbb{E}_{m,0} \|\tilde{\theta}^{(m-1)} - \theta^*\|^2 \right) \\
&\quad + 10K_2\beta^2 + 10 \left( \rho_{\max} \frac{1+\gamma}{\min |\lambda(C)|} \right)^2 K_1 \left( 1 + \frac{2}{\lambda_C} \right) \frac{\alpha^2}{\beta}.
\end{aligned}$$

576

□

577 **Lemma D.4** (Preliminary bound for  $\sum_{t=0}^{M-1} \mathbb{E}_{m,0} \|\theta_t^{(m)} - \theta^*\|^2$ ). *Under the same assumptions as*  
578 *those of Theorem 3.1, Lemma D.3, Lemma D.1, and Lemma D.2, choose the learning rates  $\alpha, \beta$  and*  
579 *the batch size  $M$  such that*

$$D := \frac{12}{\lambda_{\hat{A}}} \left\{ \frac{1}{\alpha M} + \alpha \cdot 5(1+\gamma)^2\rho_{\max}^2 \left( 1 + \frac{\gamma\rho_{\max}}{\min |\lambda(C)|} \right)^2 + \frac{\alpha^2}{\beta^2} \cdot C_1 + \beta \cdot C_2 \right\} < 1, \quad (18)$$

580 and

$$E := \frac{1}{M\beta} \cdot \frac{2}{\lambda_C} < 1, \quad (19)$$

581 where

$$C_1 = \frac{2\rho_{\max}^2\gamma^2}{\lambda_{\hat{A}}} \frac{3}{\lambda_C} \cdot 10(1+\gamma)^2\rho_{\max}^2 \cdot \left( 1 + \frac{\gamma\rho_{\max}}{\min |\lambda(C)|} \right)^2 \left( 1 + \frac{2}{\lambda_C} \right) \cdot \left( \rho_{\max} \frac{1+\gamma}{\min |\lambda(C)|} \right)^2, \quad (20)$$

582 and

$$C_2 = \frac{2\rho_{\max}^2\gamma^2}{\lambda_{\hat{A}}} \frac{3}{\lambda_C} \cdot 10(1+\gamma)^2\rho_{\max}^2 \cdot \left( 1 + \frac{1}{\min |\lambda(C)|} \right)^2. \quad (21)$$

583 Then, the following preliminary bound holds.

$$\begin{aligned}
&\mathbb{E} \|\tilde{\theta}^{(m)} - \theta^*\|^2 \\
&\leq D^m \cdot \mathbb{E} \|\tilde{\theta}^{(0)} - \theta^*\|^2 \\
&\quad + \frac{12}{\lambda_{\hat{A}}} \left\{ \frac{2\rho_{\max}^2\gamma^2}{\lambda_{\hat{A}}} \frac{3}{\lambda_C} \left[ \frac{1}{\beta M} + \beta \cdot 10 + \frac{\alpha^2}{\beta^2} \cdot 10\gamma^2\rho_{\max}^2 \left( 1 + \frac{2}{\lambda_C} \right) \cdot \left( \rho_{\max} \frac{1+\gamma}{\min |\lambda(C)|} \right)^2 \right] + \alpha \cdot 5\gamma^2\rho_{\max}^2 \right\} \\
&\quad \times \left\{ \frac{D^m - E^m}{D - E} \mathbb{E} \|\tilde{z}^{(0)}\|^2 + \frac{2}{1 - D} \cdot \left[ \beta \cdot \frac{24}{\lambda_C} H_{VR}^2 + \frac{\alpha^2}{\beta^2} \cdot \left( 1 + \frac{2}{\lambda_C} \right) \cdot \frac{2}{\lambda_C} \left( \rho_{\max} \frac{1+\gamma}{\min |\lambda(C)|} \right)^2 G_{VR}^2 \right] \right\} \\
&\quad + \frac{1}{1 - D} \left\{ \frac{\beta}{M} \cdot \frac{12}{\lambda_{\hat{A}}} \frac{60\rho_{\max}^2\gamma^2}{\lambda_{\hat{A}}\lambda_C} \cdot K_2 + \frac{\alpha^2}{\beta^2} \frac{1}{M} \cdot \frac{12}{\lambda_{\hat{A}}} \frac{60\rho_{\max}^2\gamma^2}{\lambda_{\hat{A}}\lambda_C} \cdot \left( \rho_{\max} \frac{1+\gamma}{\min |\lambda(C)|} \right)^2 K_1 \left( 1 + \frac{2}{\lambda_C} \right) + \frac{\alpha}{M} \cdot \frac{60K_1}{\lambda_{\hat{A}}} \right\}
\end{aligned}$$

584 where  $K_1$  is specified in eq.(26) in Lemma E.1, and  $K_2$  is specified in eq.(32) in Lemma E.2.

585 *Proof.* First, recall that Lemma D.1 gives the following preliminary bound for  $\sum_{t=0}^{M-1} \|\theta_t^{(m)} - \theta^*\|^2$ .

$$\begin{aligned}
&\frac{\lambda_{\hat{A}}}{6} \alpha \sum_{t=0}^{M-1} \mathbb{E}_{m,0} \|\theta_t^{(m)} - \theta^*\|^2 \\
&\leq \left[ 1 + \alpha^2 M \cdot 5(1+\gamma)^2\rho_{\max}^2 \left( 1 + \frac{\gamma\rho_{\max}}{\min |\lambda(C)|} \right)^2 \right] \mathbb{E}_{m,0} \|\tilde{\theta}^{(m-1)} - \theta^*\|^2 + \alpha^2 \cdot 5K_1 \\
&\quad + \alpha \cdot \frac{2\rho_{\max}^2\gamma^2}{\lambda_{\hat{A}}} \sum_{t=0}^{M-1} \mathbb{E}_{m,0} \|z_t^{(m)}\|^2 + \alpha^2 M \cdot 5\gamma^2\rho_{\max}^2 \mathbb{E}_{m,0} \|\tilde{z}^{(m-1)}\|^2.
\end{aligned}$$

586 Then, we combine the above preliminary bound with Lemma D.3 and obtain that

$$\frac{\lambda_{\hat{A}}}{6} \alpha \sum_{t=0}^{M-1} \mathbb{E}_{m,0} \|\theta_t^{(m)} - \theta^*\|^2$$

$$\begin{aligned}
&\leq \left[1 + \alpha^2 M \cdot 5(1 + \gamma)^2 \rho_{\max}^2 \left(1 + \frac{\gamma \rho_{\max}}{\min |\lambda(C)|}\right)^2\right] \mathbb{E}_{m,0} \|\tilde{\theta}^{(m-1)} - \theta^*\|^2 + \alpha^2 \cdot 5K_1 \\
&\quad + \frac{\alpha}{\beta} \cdot \frac{2\rho_{\max}^2 \gamma^2}{\lambda_{\hat{A}}} \frac{3}{\lambda_C} \left\{ \left[1 + \left[10\beta^2 + 10\gamma^2 \rho_{\max}^2 \left(1 + \frac{2}{\lambda_C}\right) \cdot \left(\rho_{\max} \frac{1 + \gamma}{\min |\lambda(C)|}\right)^2 \frac{\alpha^2}{\beta}\right] M \right] \mathbb{E}_{m,0} \|\tilde{z}^{(m-1)}\|^2 \right. \\
&\quad + 10(1 + \gamma)^2 \rho_{\max}^2 \cdot \left[ \left(1 + \frac{\gamma \rho_{\max}}{\min |\lambda(C)|}\right)^2 \left(1 + \frac{2}{\lambda_C}\right) \cdot \left(\rho_{\max} \frac{1 + \gamma}{\min |\lambda(C)|}\right)^2 \frac{\alpha^2}{\beta} \right. \\
&\quad + \left. \left(1 + \frac{1}{\min |\lambda(C)|}\right)^2 \beta^2 \right] \left( \sum_{t=0}^{M-1} \mathbb{E}_{m,0} \|\theta_t^{(m)} - \theta^*\|^2 + M \mathbb{E}_{m,0} \|\tilde{\theta}^{(m-1)} - \theta^*\|^2 \right) \\
&\quad + \left. 10K_2 \beta^2 + 10 \left(\rho_{\max} \frac{1 + \gamma}{\min |\lambda(C)|}\right)^2 K_1 \left(1 + \frac{2}{\lambda_C}\right) \frac{\alpha^2}{\beta} \right\} \\
&\quad + \alpha^2 M \cdot 5\gamma^2 \rho_{\max}^2 \mathbb{E}_{m,0} \|\tilde{z}^{(m-1)}\|^2 \\
&= \left[1 + \alpha^2 M \cdot 5(1 + \gamma)^2 \rho_{\max}^2 \left(1 + \frac{\gamma \rho_{\max}}{\min |\lambda(C)|}\right)^2\right] \mathbb{E}_{m,0} \|\tilde{\theta}^{(m-1)} - \theta^*\|^2 + \alpha^2 \cdot 5K_1 \\
&\quad + \frac{\alpha}{\beta} \cdot \frac{2\rho_{\max}^2 \gamma^2}{\lambda_{\hat{A}}} \frac{3}{\lambda_C} \left[1 + \left[10\beta^2 + 10\gamma^2 \rho_{\max}^2 \left(1 + \frac{2}{\lambda_C}\right) \cdot \left(\rho_{\max} \frac{1 + \gamma}{\min |\lambda(C)|}\right)^2 \frac{\alpha^2}{\beta}\right] M \right] \mathbb{E}_{m,0} \|\tilde{z}^{(m-1)}\|^2 \\
&\quad + \frac{\alpha}{\beta} \cdot \frac{2\rho_{\max}^2 \gamma^2}{\lambda_{\hat{A}}} \frac{3}{\lambda_C} \cdot 10(1 + \gamma)^2 \rho_{\max}^2 \cdot \left[ \left(1 + \frac{\gamma \rho_{\max}}{\min |\lambda(C)|}\right)^2 \left(1 + \frac{2}{\lambda_C}\right) \cdot \left(\rho_{\max} \frac{1 + \gamma}{\min |\lambda(C)|}\right)^2 \frac{\alpha^2}{\beta} \right. \\
&\quad + \left. \left(1 + \frac{1}{\min |\lambda(C)|}\right)^2 \beta^2 \right] \left( \sum_{t=0}^{M-1} \mathbb{E}_{m,0} \|\theta_t^{(m)} - \theta^*\|^2 + M \mathbb{E}_{m,0} \|\tilde{\theta}^{(m-1)} - \theta^*\|^2 \right) \\
&\quad + \frac{\alpha}{\beta} \cdot \frac{2\rho_{\max}^2 \gamma^2}{\lambda_{\hat{A}}} \frac{3}{\lambda_C} \cdot 10K_2 \beta^2 + \frac{\alpha}{\beta} \cdot \frac{2\rho_{\max}^2 \gamma^2}{\lambda_{\hat{A}}} \frac{3}{\lambda_C} \cdot 10 \left(\rho_{\max} \frac{1 + \gamma}{\min |\lambda(C)|}\right)^2 K_1 \left(1 + \frac{2}{\lambda_C}\right) \frac{\alpha^2}{\beta} \\
&\quad + \alpha^2 M \cdot 5\gamma^2 \rho_{\max}^2 \mathbb{E}_{m,0} \|\tilde{z}^{(m-1)}\|^2 \\
&= \left[1 + \alpha^2 M \cdot 5(1 + \gamma)^2 \rho_{\max}^2 \left(1 + \frac{\gamma \rho_{\max}}{\min |\lambda(C)|}\right)^2\right] \mathbb{E}_{m,0} \|\tilde{\theta}^{(m-1)} - \theta^*\|^2 \\
&\quad + \left\{ \frac{\alpha}{\beta} \cdot \frac{2\rho_{\max}^2 \gamma^2}{\lambda_{\hat{A}}} \frac{3}{\lambda_C} \left[1 + \left[10\beta^2 + 10\gamma^2 \rho_{\max}^2 \left(1 + \frac{2}{\lambda_C}\right) \cdot \left(\rho_{\max} \frac{1 + \gamma}{\min |\lambda(C)|}\right)^2 \frac{\alpha^2}{\beta}\right] M \right] \right. \\
&\quad + \left. \alpha^2 M \cdot 5\gamma^2 \rho_{\max}^2 \right\} \mathbb{E}_{m,0} \|\tilde{z}^{(m-1)}\|^2 \\
&\quad + \frac{\alpha}{\beta} \cdot \frac{2\rho_{\max}^2 \gamma^2}{\lambda_{\hat{A}}} \frac{3}{\lambda_C} \cdot 10(1 + \gamma)^2 \rho_{\max}^2 \cdot \left[ \left(1 + \frac{\gamma \rho_{\max}}{\min |\lambda(C)|}\right)^2 \left(1 + \frac{2}{\lambda_C}\right) \cdot \left(\rho_{\max} \frac{1 + \gamma}{\min |\lambda(C)|}\right)^2 \frac{\alpha^2}{\beta} \right. \\
&\quad + \left. \left(1 + \frac{1}{\min |\lambda(C)|}\right)^2 \beta^2 \right] \left( \sum_{t=0}^{M-1} \mathbb{E}_{m,0} \|\theta_t^{(m)} - \theta^*\|^2 + M \mathbb{E}_{m,0} \|\tilde{\theta}^{(m-1)} - \theta^*\|^2 \right) \\
&\quad + \alpha\beta \cdot \frac{60\rho_{\max}^2 \gamma^2}{\lambda_{\hat{A}} \lambda_C} \cdot K_2 + \frac{\alpha^3}{\beta^2} \cdot \frac{60\rho_{\max}^2 \gamma^2}{\lambda_{\hat{A}} \lambda_C} \cdot \left(\rho_{\max} \frac{1 + \gamma}{\min |\lambda(C)|}\right)^2 K_1 \left(1 + \frac{2}{\lambda_C}\right) + \alpha^2 \cdot 5K_1,
\end{aligned}$$

587 where in the first equality we expand the curly bracket and in the last equality we combine and  
588 re-arrange the terms. Then, we move the term  $\sum_{t=0}^{M-1} \mathbb{E}_{m,0} \|\theta_t^{(m)} - \theta^*\|^2$  in the last equality to the  
589 left-hand side and obtain that

$$\begin{aligned}
&\left\{ \frac{\lambda_{\hat{A}}}{6} \alpha - \frac{\alpha}{\beta} \cdot \frac{2\rho_{\max}^2 \gamma^2}{\lambda_{\hat{A}}} \frac{3}{\lambda_C} \cdot 10(1 + \gamma)^2 \rho_{\max}^2 \cdot \left[ \left(1 + \frac{\gamma \rho_{\max}}{\min |\lambda(C)|}\right)^2 \left(1 + \frac{2}{\lambda_C}\right) \cdot \left(\rho_{\max} \frac{1 + \gamma}{\min |\lambda(C)|}\right)^2 \frac{\alpha^2}{\beta} \right. \right. \\
&\quad + \left. \left. \left(1 + \frac{1}{\min |\lambda(C)|}\right)^2 \beta^2 \right] \right\} \sum_{t=0}^{M-1} \mathbb{E}_{m,0} \|\theta_t^{(m)} - \theta^*\|^2 \\
&\leq \left[ \left[1 + \alpha^2 M \cdot 5(1 + \gamma)^2 \rho_{\max}^2 \left(1 + \frac{\gamma \rho_{\max}}{\min |\lambda(C)|}\right)^2\right] \right. \\
&\quad + \left. \frac{\alpha}{\beta} \cdot \frac{2\rho_{\max}^2 \gamma^2}{\lambda_{\hat{A}}} \frac{3}{\lambda_C} \cdot 10(1 + \gamma)^2 \rho_{\max}^2 \cdot \left[ \left(1 + \frac{\gamma \rho_{\max}}{\min |\lambda(C)|}\right)^2 \left(1 + \frac{2}{\lambda_C}\right) \cdot \left(\rho_{\max} \frac{1 + \gamma}{\min |\lambda(C)|}\right)^2 \frac{\alpha^2}{\beta} \right] \right.
\end{aligned}$$

$$\begin{aligned}
& + (1 + \frac{1}{\min |\lambda(C)|})^2 \beta^2 \Big] \cdot M \Big\} \mathbb{E}_{m,0} \|\tilde{\theta}^{(m-1)} - \theta^*\|^2 \\
& + \left\{ \frac{\alpha}{\beta} \cdot \frac{2\rho_{\max}^2 \gamma^2}{\lambda_{\hat{A}}} \frac{3}{\lambda_C} \left[ 1 + \left[ 10\beta^2 + 10\gamma^2 \rho_{\max}^2 \left( 1 + \frac{2}{\lambda_C} \right) \cdot \left( \rho_{\max} \frac{1+\gamma}{\min |\lambda(C)|} \right)^2 \frac{\alpha^2}{\beta} \right] M \right] \right. \\
& + \alpha^2 M \cdot 5\gamma^2 \rho_{\max}^2 \Big\} \mathbb{E}_{m,0} \|\tilde{z}^{(m-1)}\|^2 \\
& + \alpha\beta \cdot \frac{60\rho_{\max}^2 \gamma^2}{\lambda_{\hat{A}} \lambda_C} \cdot K_2 + \frac{\alpha^3}{\beta^2} \cdot \frac{60\rho_{\max}^2 \gamma^2}{\lambda_{\hat{A}} \lambda_C} \cdot \left( \rho_{\max} \frac{1+\gamma}{\min |\lambda(C)|} \right)^2 K_1 \left( 1 + \frac{2}{\lambda_C} \right) + \alpha^2 \cdot 5K_1 \quad (22)
\end{aligned}$$

Now we define the following constants to further simplify the result above.

$$\begin{aligned}
\bullet \quad C_1 &= \frac{2\rho_{\max}^2 \gamma^2}{\lambda_{\hat{A}}} \frac{3}{\lambda_C} \cdot 10(1+\gamma)^2 \rho_{\max}^2 \cdot \left( 1 + \frac{\gamma \rho_{\max}}{\min |\lambda(C)|} \right)^2 \left( 1 + \frac{2}{\lambda_C} \right) \cdot \left( \rho_{\max} \frac{1+\gamma}{\min |\lambda(C)|} \right)^2, \\
\bullet \quad C_2 &= \frac{2\rho_{\max}^2 \gamma^2}{\lambda_{\hat{A}}} \frac{3}{\lambda_C} \cdot 10(1+\gamma)^2 \rho_{\max}^2 \cdot \left( 1 + \frac{1}{\min |\lambda(C)|} \right)^2.
\end{aligned}$$

Then, eq.(22) can be rewritten as

$$\begin{aligned}
& \left\{ \frac{\lambda_{\hat{A}}}{6} \alpha - \alpha \cdot \left( \frac{\alpha^2}{\beta^2} \cdot C_1 + \beta \cdot C_2 \right) \right\} \sum_{t=0}^{M-1} \mathbb{E}_{m,0} \|\theta_t^{(m)} - \theta^*\|^2 \\
& \leq \left\{ 1 + \alpha^2 M \cdot 5(1+\gamma)^2 \rho_{\max}^2 \left( 1 + \frac{\gamma \rho_{\max}}{\min |\lambda(C)|} \right)^2 + \alpha M \cdot \left( \frac{\alpha^2}{\beta^2} \cdot C_1 + \beta \cdot C_2 \right) \right\} \mathbb{E}_{m,0} \|\tilde{\theta}^{(m-1)} - \theta^*\|^2 \\
& + \left\{ \frac{\alpha}{\beta} \cdot \frac{2\rho_{\max}^2 \gamma^2}{\lambda_{\hat{A}}} \frac{3}{\lambda_C} \left[ 1 + \left[ 10\beta^2 + 10\gamma^2 \rho_{\max}^2 \left( 1 + \frac{2}{\lambda_C} \right) \cdot \left( \rho_{\max} \frac{1+\gamma}{\min |\lambda(C)|} \right)^2 \frac{\alpha^2}{\beta} \right] M \right] + \alpha^2 M \cdot 5\gamma^2 \rho_{\max}^2 \right\} \mathbb{E}_{m,0} \|\tilde{z}^{(m-1)}\|^2 \\
& + \alpha\beta \cdot \frac{60\rho_{\max}^2 \gamma^2}{\lambda_{\hat{A}} \lambda_C} \cdot K_2 + \frac{\alpha^3}{\beta^2} \cdot \frac{60\rho_{\max}^2 \gamma^2}{\lambda_{\hat{A}} \lambda_C} \cdot \left( \rho_{\max} \frac{1+\gamma}{\min |\lambda(C)|} \right)^2 K_1 \left( 1 + \frac{2}{\lambda_C} \right) + \alpha^2 \cdot 5K_1.
\end{aligned}$$

Apply Lemma D.2 to the inequality above and taking total expectation on both sides, we obtain that

$$\begin{aligned}
& \left\{ \frac{\lambda_{\hat{A}}}{6} \alpha - \alpha \cdot \left( \frac{\alpha^2}{\beta^2} \cdot C_1 + \beta \cdot C_2 \right) \right\} \sum_{t=0}^{M-1} \mathbb{E} \|\theta_t^{(m)} - \theta^*\|^2 \\
& \leq \left\{ 1 + \alpha^2 M \cdot 5(1+\gamma)^2 \rho_{\max}^2 \left( 1 + \frac{\gamma \rho_{\max}}{\min |\lambda(C)|} \right)^2 + \alpha M \cdot \left( \frac{\alpha^2}{\beta^2} \cdot C_1 + \beta \cdot C_2 \right) \right\} \mathbb{E} \|\tilde{\theta}^{(m-1)} - \theta^*\|^2 \\
& + \left\{ \frac{\alpha}{\beta} \cdot \frac{2\rho_{\max}^2 \gamma^2}{\lambda_{\hat{A}}} \frac{3}{\lambda_C} \left[ 1 + \left[ 10\beta^2 + 10\gamma^2 \rho_{\max}^2 \left( 1 + \frac{2}{\lambda_C} \right) \cdot \left( \rho_{\max} \frac{1+\gamma}{\min |\lambda(C)|} \right)^2 \frac{\alpha^2}{\beta} \right] M \right] + \alpha^2 M \cdot 5\gamma^2 \rho_{\max}^2 \right\} \\
& \times \left\{ \left( \frac{1}{M\beta} \cdot \frac{2}{\lambda_C} \right)^m \mathbb{E} \|\tilde{z}^{(0)}\|^2 + 2 \cdot \left[ \beta \cdot \frac{24}{\lambda_C} H_{\text{VR}}^2 + \frac{\alpha^2}{\beta^2} \cdot \left( 1 + \frac{2}{\lambda_C} \right) \cdot \frac{2}{\lambda_C} \left( \rho_{\max} \frac{1+\gamma}{\min |\lambda(C)|} \right)^2 G_{\text{VR}}^2 \right] \right\} \\
& + \alpha\beta \cdot \frac{60\rho_{\max}^2 \gamma^2}{\lambda_{\hat{A}} \lambda_C} \cdot K_2 + \frac{\alpha^3}{\beta^2} \cdot \frac{60\rho_{\max}^2 \gamma^2}{\lambda_{\hat{A}} \lambda_C} \cdot \left( \rho_{\max} \frac{1+\gamma}{\min |\lambda(C)|} \right)^2 K_1 \left( 1 + \frac{2}{\lambda_C} \right) + \alpha^2 \cdot 5K_1.
\end{aligned}$$

Let  $\frac{\lambda_{\hat{A}}}{6} \alpha - \alpha \cdot \left( \frac{\alpha^2}{\beta^2} \cdot C_1 + \beta \cdot C_2 \right) \geq \frac{\lambda_{\hat{A}}}{12} \alpha$  and divide  $\frac{\lambda_{\hat{A}}}{12} \alpha M$  on both sides of the above inequality.

Then, apply Jensen's inequality to the left-hand side of the inequality above, we obtain that

$$\begin{aligned}
& \mathbb{E} \|\tilde{\theta}^{(m)} - \theta^*\|^2 \\
& \leq \frac{12}{\lambda_{\hat{A}}} \left\{ \frac{1}{\alpha M} + \alpha \cdot 5(1+\gamma)^2 \rho_{\max}^2 \left( 1 + \frac{\gamma \rho_{\max}}{\min |\lambda(C)|} \right)^2 + \frac{\alpha^2}{\beta^2} \cdot C_1 + \beta \cdot C_2 \right\} \mathbb{E} \|\tilde{\theta}^{(m-1)} - \theta^*\|^2 \\
& + \frac{12}{\lambda_{\hat{A}}} \left\{ \frac{1}{\beta M} \cdot \frac{2\rho_{\max}^2 \gamma^2}{\lambda_{\hat{A}}} \frac{3}{\lambda_C} \left[ 1 + \left[ 10\beta^2 + 10\gamma^2 \rho_{\max}^2 \left( 1 + \frac{2}{\lambda_C} \right) \cdot \left( \rho_{\max} \frac{1+\gamma}{\min |\lambda(C)|} \right)^2 \frac{\alpha^2}{\beta} \right] M \right] + \alpha \cdot 5\gamma^2 \rho_{\max}^2 \right\} \\
& \times \left\{ \left( \frac{1}{M\beta} \cdot \frac{2}{\lambda_C} \right)^{m-1} \mathbb{E} \|\tilde{z}^{(0)}\|^2 + 2 \cdot \left[ \beta \cdot \frac{24}{\lambda_C} H_{\text{VR}}^2 + \frac{\alpha^2}{\beta^2} \cdot \left( 1 + \frac{2}{\lambda_C} \right) \cdot \frac{2}{\lambda_C} \left( \rho_{\max} \frac{1+\gamma}{\min |\lambda(C)|} \right)^2 G_{\text{VR}}^2 \right] \right\} \\
& + \frac{\beta}{M} \cdot \frac{12}{\lambda_{\hat{A}}} \frac{60\rho_{\max}^2 \gamma^2}{\lambda_{\hat{A}} \lambda_C} \cdot K_2 + \frac{\alpha^2}{\beta^2} \frac{1}{M} \cdot \frac{12}{\lambda_{\hat{A}}} \frac{60\rho_{\max}^2 \gamma^2}{\lambda_{\hat{A}} \lambda_C} \cdot \left( \rho_{\max} \frac{1+\gamma}{\min |\lambda(C)|} \right)^2 K_1 \left( 1 + \frac{2}{\lambda_C} \right) + \frac{\alpha}{M} \cdot \frac{60K_1}{\lambda_{\hat{A}}}.
\end{aligned}$$



597 Next, we define  $D := \frac{12}{\lambda_{\hat{A}}} \left\{ \frac{1}{\alpha M} + \alpha \cdot 5(1 + \gamma)^2 \rho_{\max}^2 \left(1 + \frac{\gamma \rho_{\max}}{\min |\lambda(C)|}\right)^2 + \frac{\alpha^2}{\beta^2} \cdot C_1 + \beta \cdot C_2 \right\}$  and

598  $E := \frac{1}{M\beta} \cdot \frac{2}{\lambda_C}$ . Telescoping the above inequality yields that

$$\begin{aligned}
& \mathbb{E} \|\tilde{\theta}^{(m)} - \theta^*\|^2 \\
& \leq D^m \cdot \mathbb{E} \|\tilde{\theta}^{(0)} - \theta^*\|^2 \\
& \quad + \frac{12}{\lambda_{\hat{A}}} \left\{ \frac{1}{\beta M} \cdot \frac{2\rho_{\max}^2 \gamma^2}{\lambda_{\hat{A}}} \frac{3}{\lambda_C} \left[ 1 + \left[ 10\beta^2 + 10\gamma^2 \rho_{\max}^2 \left(1 + \frac{2}{\lambda_C}\right) \cdot \left(\rho_{\max} \frac{1+\gamma}{\min |\lambda(C)|}\right)^2 \frac{\alpha^2}{\beta} \right] M \right] + \alpha \cdot 5\gamma^2 \rho_{\max}^2 \right\} \\
& \quad \times \left\{ \frac{D^m - E^m}{D - E} \mathbb{E} \|\tilde{z}^{(0)}\|^2 + \frac{2}{1 - D} \cdot \left[ \beta \cdot \frac{24}{\lambda_C} H_{\text{VR}}^2 + \frac{\alpha^2}{\beta^2} \cdot \left(1 + \frac{2}{\lambda_C}\right) \cdot \frac{2}{\lambda_C} \left(\rho_{\max} \frac{1+\gamma}{\min |\lambda(C)|}\right)^2 G_{\text{VR}}^2 \right] \right\} \\
& \quad + \frac{1}{1 - D} \left\{ \frac{\beta}{M} \cdot \frac{12}{\lambda_{\hat{A}}} \frac{60\rho_{\max}^2 \gamma^2}{\lambda_{\hat{A}} \lambda_C} \cdot K_2 + \frac{\alpha^2}{\beta^2} \frac{1}{M} \cdot \frac{12}{\lambda_{\hat{A}}} \frac{60\rho_{\max}^2 \gamma^2}{\lambda_{\hat{A}} \lambda_C} \cdot \left(\rho_{\max} \frac{1+\gamma}{\min |\lambda(C)|}\right)^2 K_1 \left(1 + \frac{2}{\lambda_C}\right) + \frac{\alpha}{M} \cdot \frac{60K_1}{\lambda_{\hat{A}}} \right\} \\
& = D^m \cdot \mathbb{E} \|\tilde{\theta}^{(0)} - \theta^*\|^2 \\
& \quad + \frac{12}{\lambda_{\hat{A}}} \left\{ \frac{2\rho_{\max}^2 \gamma^2}{\lambda_{\hat{A}}} \frac{3}{\lambda_C} \left[ \frac{1}{\beta M} + \beta \cdot 10 + \frac{\alpha^2}{\beta^2} \cdot 10\gamma^2 \rho_{\max}^2 \left(1 + \frac{2}{\lambda_C}\right) \cdot \left(\rho_{\max} \frac{1+\gamma}{\min |\lambda(C)|}\right)^2 \right] + \alpha \cdot 5\gamma^2 \rho_{\max}^2 \right\} \\
& \quad \times \left\{ \frac{D^m - E^m}{D - E} \mathbb{E} \|\tilde{z}^{(0)}\|^2 + \frac{2}{1 - D} \cdot \left[ \beta \cdot \frac{24}{\lambda_C} H_{\text{VR}}^2 + \frac{\alpha^2}{\beta^2} \cdot \left(1 + \frac{2}{\lambda_C}\right) \cdot \frac{2}{\lambda_C} \left(\rho_{\max} \frac{1+\gamma}{\min |\lambda(C)|}\right)^2 G_{\text{VR}}^2 \right] \right\} \\
& \quad + \frac{1}{1 - D} \left\{ \frac{\beta}{M} \cdot \frac{12}{\lambda_{\hat{A}}} \frac{60\rho_{\max}^2 \gamma^2}{\lambda_{\hat{A}} \lambda_C} \cdot K_2 + \frac{\alpha^2}{\beta^2} \frac{1}{M} \cdot \frac{12}{\lambda_{\hat{A}}} \frac{60\rho_{\max}^2 \gamma^2}{\lambda_{\hat{A}} \lambda_C} \cdot \left(\rho_{\max} \frac{1+\gamma}{\min |\lambda(C)|}\right)^2 K_1 \left(1 + \frac{2}{\lambda_C}\right) + \frac{\alpha}{M} \cdot \frac{60K_1}{\lambda_{\hat{A}}} \right\},
\end{aligned}$$

599 where in the last equality we re-arrange and simplify the upper bound to get the desired bound.

600

□

601 **Lemma D.5** (Refined Bound for  $\mathbb{E} \|\tilde{z}^{(m)}\|^2$ ). *Under the same assumptions as those of Theorem 3.1,*  
602 *Lemma D.3, Lemma D.1, Lemma D.4 and Lemma D.2, choose the learning rates  $\alpha, \beta$  and the batch*  
603 *size  $M$  such that*

$$\begin{aligned}
F := & \frac{4}{\lambda_C} \left[ \frac{1}{\beta M} + \beta \cdot 10 + \frac{\alpha^2}{\beta^2} \cdot 10\gamma^2 \rho_{\max}^2 \left(1 + \frac{2}{\lambda_C}\right) \cdot \left(\rho_{\max} \frac{1+\gamma}{\min |\lambda(C)|}\right)^2 \right. \\
& \left. + \left( \frac{\alpha^3}{\beta^2} \cdot C_3 + \alpha\beta \cdot C_4 \right) \frac{30}{\lambda_{\hat{A}}} \gamma^2 \rho_{\max}^2 \right] < 1
\end{aligned} \tag{23}$$

604 and

605  $\bullet \frac{1}{\alpha M} + \alpha \cdot 5(1 + \gamma)^2 \rho_{\max}^2 \left(1 + \frac{\gamma \rho_{\max}}{\min |\lambda(C)|}\right)^2 \leq \frac{\lambda_{\hat{A}}}{6},$

606  $\bullet \frac{\alpha^2}{\beta^2} \cdot C_3 + \beta \cdot C_4 \leq \frac{1-D}{144} \frac{\lambda_{\hat{A}}^2 \lambda_C}{\rho_{\max}^2 \gamma^2},$

607  $\bullet \frac{\alpha^2}{\beta^2} \cdot C_3 + \beta \cdot C_4 \leq 5(1 - D),$

608 where

$$C_3 := 10(1 + \gamma)^2 \rho_{\max}^2 \cdot \left(1 + \frac{\gamma \rho_{\max}}{\min |\lambda(C)|}\right)^2 \left(1 + \frac{2}{\lambda_C}\right) \cdot \left(\rho_{\max} \frac{1+\gamma}{\min |\lambda(C)|}\right)^2 \tag{24}$$

609 and

$$C_4 := 10(1 + \gamma)^2 \rho_{\max}^2 \cdot \left(1 + \frac{1}{\min |\lambda(C)|}\right)^2 \tag{25}$$

610 and  $D$  is specified in eq.(18) in Lemma D.4. Then, the following refined bound holds.

$$\begin{aligned}
& \mathbb{E} \|\tilde{z}^{(m)}\|^2 \\
& \leq F^m \cdot \mathbb{E} \|\tilde{z}^{(0)}\|^2 + \frac{D^m - F^m}{D - F} \cdot \mathbb{E} \|\tilde{\theta}^{(0)} - \theta^*\|^2 + \frac{\frac{D^m - F^m}{D - F} - \frac{E^m - F^m}{E - F}}{D - E} \mathbb{E} \|\tilde{z}^{(0)}\|^2
\end{aligned}$$

$$\begin{aligned}
& + \frac{1}{1-F} \frac{1}{1-D} \frac{1152}{\lambda_{\hat{A}}^2} \frac{\rho_{\max}^2 \gamma^2}{\lambda_C^2} \left( \frac{\alpha^2}{\beta^2} \cdot C_3 + \beta \cdot C_4 \right) \left[ \frac{1}{\beta M} + \beta \cdot 20 + \frac{\alpha^2}{\beta^2} \cdot 20 \gamma^2 \rho_{\max}^2 \left( 1 + \frac{2}{\lambda_C} \right) \cdot \left( \rho_{\max} \frac{1+\gamma}{\min |\lambda(C)|} \right)^2 \right] \\
& \times \left[ \beta \cdot \frac{24}{\lambda_C} H_{VR}^2 + \frac{\alpha^2}{\beta^2} \cdot \left( 1 + \frac{2}{\lambda_C} \right) \cdot \frac{2}{\lambda_C} \left( \rho_{\max} \frac{1+\gamma}{\min |\lambda(C)|} \right)^2 G_{VR}^2 \right] \\
& + \frac{1}{1-F} \frac{1}{1-D} \left[ \frac{\beta}{M} \cdot \left( \frac{80}{\lambda_C} K_2 + C_4 \frac{600}{\lambda_C} \frac{K_1}{\lambda_{\hat{A}}} \right) + \frac{\alpha^2}{\beta^2} \frac{1}{M} \cdot \left( \frac{80}{\lambda_C} \left( \rho_{\max} \frac{1+\gamma}{\min |\lambda(C)|} \right)^2 K_1 \left( 1 + \frac{2}{\lambda_C} \right) + C_3 \frac{600}{\lambda_C} \frac{K_1}{\lambda_{\hat{A}}} \right) \right].
\end{aligned}$$

611 where  $K_1$  is specified in eq.(26) in Lemma E.1,  $K_2$  is specified in eq.(32) in Lemma E.2,  $D$  and  $E$   
612 are specified in eq.(18) and eq.(19) in Lemma D.4.

613 *Proof.* From Lemma D.3, we have the following inequality

$$\begin{aligned}
& \frac{\lambda_C}{3} \beta \sum_{t=0}^{M-1} \mathbb{E}_{m,0} \|z_t^{(m)}\|^2 \\
& \leq \left[ 1 + \left[ 10\beta^2 + 10\gamma^2 \rho_{\max}^2 \left( 1 + \frac{2}{\lambda_C} \right) \cdot \left( \rho_{\max} \frac{1+\gamma}{\min |\lambda(C)|} \right)^2 \frac{\alpha^2}{\beta} \right] M \right] \mathbb{E}_{m,0} \|\tilde{z}^{(m-1)}\|^2 \\
& \quad + 10(1+\gamma)^2 \rho_{\max}^2 \cdot \left[ \left( 1 + \frac{\gamma \rho_{\max}}{\min |\lambda(C)|} \right)^2 \left( 1 + \frac{2}{\lambda_C} \right) \cdot \left( \rho_{\max} \frac{1+\gamma}{\min |\lambda(C)|} \right)^2 \frac{\alpha^2}{\beta} \right. \\
& \quad \left. + \left( 1 + \frac{1}{\min |\lambda(C)|} \right)^2 \beta^2 \right] \left( \sum_{t=0}^{M-1} \mathbb{E}_{m,0} \|\theta_t^{(m)} - \theta^*\|^2 + M \mathbb{E}_{m,0} \|\tilde{\theta}^{(m-1)} - \theta^*\|^2 \right) \\
& \quad + 10K_2 \beta^2 + 10 \left( \rho_{\max} \frac{1+\gamma}{\min |\lambda(C)|} \right)^2 K_1 \left( 1 + \frac{2}{\lambda_C} \right) \frac{\alpha^2}{\beta}.
\end{aligned}$$

614 Note that we have already bounded  $\sum_{t=0}^{M-1} \mathbb{E}_{m,0} \|\theta_t^{(m)} - \theta^*\|^2$  in Lemma D.1. Then, we plug the  
615 result of Lemma D.1 into the above inequality and obtain that

$$\begin{aligned}
& \frac{\lambda_C}{3} \beta \sum_{t=0}^{M-1} \mathbb{E}_{m,0} \|z_t^{(m)}\|^2 \\
& \leq \left[ 1 + \left[ 10\beta^2 + 10\gamma^2 \rho_{\max}^2 \left( 1 + \frac{2}{\lambda_C} \right) \cdot \left( \rho_{\max} \frac{1+\gamma}{\min |\lambda(C)|} \right)^2 \frac{\alpha^2}{\beta} \right] M \right] \mathbb{E}_{m,0} \|\tilde{z}^{(m-1)}\|^2 \\
& \quad + 10(1+\gamma)^2 \rho_{\max}^2 \cdot \left[ \left( 1 + \frac{\gamma \rho_{\max}}{\min |\lambda(C)|} \right)^2 \left( 1 + \frac{2}{\lambda_C} \right) \cdot \left( \rho_{\max} \frac{1+\gamma}{\min |\lambda(C)|} \right)^2 \frac{\alpha^2}{\beta} \right. \\
& \quad \left. + \left( 1 + \frac{1}{\min |\lambda(C)|} \right)^2 \beta^2 \right] \left( \frac{6}{\lambda_{\hat{A}}} \frac{1}{\alpha} \left\{ \left[ 1 + \alpha^2 M \cdot 5(1+\gamma)^2 \rho_{\max}^2 \left( 1 + \frac{\gamma \rho_{\max}}{\min |\lambda(C)|} \right)^2 \right] \mathbb{E}_{m,0} \|\tilde{\theta}^{(m-1)} - \theta^*\|^2 + \alpha^2 \cdot 5K_1 \right. \right. \\
& \quad \left. \left. + \alpha \cdot \frac{2\rho_{\max}^2 \gamma^2}{\lambda_{\hat{A}}} \sum_{t=0}^{M-1} \mathbb{E}_{m,0} \|z_t^{(m)}\|^2 + \alpha^2 M \cdot 5\gamma^2 \rho_{\max}^2 \mathbb{E}_{m,0} \|\tilde{z}^{(m-1)}\|^2 \right\} + M \mathbb{E}_{m,0} \|\tilde{\theta}^{(m-1)} - \theta^*\|^2 \right) \\
& \quad + 10K_2 \beta^2 + 10 \left( \rho_{\max} \frac{1+\gamma}{\min |\lambda(C)|} \right)^2 K_1 \left( 1 + \frac{2}{\lambda_C} \right) \frac{\alpha^2}{\beta}.
\end{aligned}$$

616 Define  $C_3 = 10(1+\gamma)^2 \rho_{\max}^2 \cdot \left( 1 + \frac{\gamma \rho_{\max}}{\min |\lambda(C)|} \right)^2 \left( 1 + \frac{2}{\lambda_C} \right) \cdot \left( \rho_{\max} \frac{1+\gamma}{\min |\lambda(C)|} \right)^2$  and  $C_4 = 10(1 +$   
617  $\gamma)^2 \rho_{\max}^2 \cdot \left( 1 + \frac{1}{\min |\lambda(C)|} \right)^2$ , then the above inequality can be re-written as

$$\begin{aligned}
& \frac{\lambda_C}{3} \beta \sum_{t=0}^{M-1} \mathbb{E}_{m,0} \|z_t^{(m)}\|^2 \\
& \leq \left[ 1 + \left[ 10\beta^2 + 10\gamma^2 \rho_{\max}^2 \left( 1 + \frac{2}{\lambda_C} \right) \cdot \left( \rho_{\max} \frac{1+\gamma}{\min |\lambda(C)|} \right)^2 \frac{\alpha^2}{\beta} \right] M \right] \mathbb{E}_{m,0} \|\tilde{z}^{(m-1)}\|^2 \\
& \quad + \left( \frac{\alpha^2}{\beta} \cdot C_3 + \beta^2 \cdot C_4 \right) \left( \frac{6}{\lambda_{\hat{A}}} \frac{1}{\alpha} \left\{ \left[ 1 + \alpha^2 M \cdot 5(1+\gamma)^2 \rho_{\max}^2 \left( 1 + \frac{\gamma \rho_{\max}}{\min |\lambda(C)|} \right)^2 \right] \mathbb{E}_{m,0} \|\tilde{\theta}^{(m-1)} - \theta^*\|^2 + \alpha^2 \cdot 5K_1 \right. \right.
\end{aligned}$$

$$\begin{aligned}
& + \alpha \cdot \frac{2\rho_{\max}^2 \gamma^2}{\lambda_{\hat{A}}} \sum_{t=0}^{M-1} \mathbb{E}_{m,0} \|z_t^{(m)}\|^2 + \alpha^2 M \cdot 5\gamma^2 \rho_{\max}^2 \mathbb{E}_{m,0} \|\tilde{z}^{(m-1)}\|^2 \Big\} + M \mathbb{E}_{m,0} \|\tilde{\theta}^{(m-1)} - \theta^*\|^2 \\
& + 10K_2\beta^2 + 10\left(\rho_{\max} \frac{1+\gamma}{\min|\lambda(C)|}\right)^2 K_1 \left(1 + \frac{2}{\lambda_C}\right) \frac{\alpha^2}{\beta}.
\end{aligned}$$

618 Simplifying the above inequality yields that

$$\begin{aligned}
& \left[ \frac{\lambda_C}{3} \beta - \left( \frac{\alpha^2}{\beta} \cdot C_3 + \beta^2 \cdot C_4 \right) \frac{12\rho_{\max}^2 \gamma^2}{\lambda_{\hat{A}}^2} \right] \sum_{t=0}^{M-1} \mathbb{E}_{m,0} \|z_t^{(m)}\|^2 \\
& \leq \left[ 1 + \left[ 10\beta^2 + 10\gamma^2 \rho_{\max}^2 \left(1 + \frac{2}{\lambda_C}\right) \cdot \left(\rho_{\max} \frac{1+\gamma}{\min|\lambda(C)|}\right)^2 \frac{\alpha^2}{\beta} \right] M + \left( \frac{\alpha^2}{\beta} \cdot C_3 + \beta^2 \cdot C_4 \right) \frac{30}{\lambda_{\hat{A}}} \gamma^2 \rho_{\max}^2 \alpha M \right] \mathbb{E}_{m,0} \|\tilde{z}^{(m-1)}\|^2 \\
& \quad + \left( \frac{\alpha^2}{\beta} \cdot C_3 + \beta^2 \cdot C_4 \right) \left( \frac{6}{\lambda_{\hat{A}}} \frac{1}{\alpha} \left[ 1 + \alpha^2 M \cdot 5(1+\gamma)^2 \rho_{\max}^2 \left(1 + \frac{\gamma \rho_{\max}}{\min|\lambda(C)|}\right)^2 \right] + M \right) \mathbb{E}_{m,0} \|\tilde{\theta}^{(m-1)} - \theta^*\|^2 \\
& \quad + 10K_2\beta^2 + 10\left(\rho_{\max} \frac{1+\gamma}{\min|\lambda(C)|}\right)^2 K_1 \left(1 + \frac{2}{\lambda_C}\right) \frac{\alpha^2}{\beta} + \left( \frac{\alpha^2}{\beta} \cdot C_3 + \beta^2 \cdot C_4 \right) \alpha \cdot \frac{30}{\lambda_{\hat{A}}} K_1.
\end{aligned}$$

619 Let  $\frac{\lambda_C}{3} \beta - \left( \frac{\alpha^2}{\beta} \cdot C_3 + \beta^2 \cdot C_4 \right) \frac{12\rho_{\max}^2 \gamma^2}{\lambda_{\hat{A}}^2} \geq \frac{\lambda_C}{4} \beta$ . Dividing  $\frac{\lambda_C}{4} \beta M$  and taking total expectation on

620 both sides, and applying Jensen's inequality to the left-hand side, we obtain that

$$\begin{aligned}
& \mathbb{E} \|\tilde{z}^{(m)}\|^2 \\
& \leq \frac{4}{\lambda_C} \left[ \frac{1}{\beta M} + \beta \cdot 10 + \frac{\alpha^2}{\beta^2} \cdot 10\gamma^2 \rho_{\max}^2 \left(1 + \frac{2}{\lambda_C}\right) \cdot \left(\rho_{\max} \frac{1+\gamma}{\min|\lambda(C)|}\right)^2 + \left( \frac{\alpha^3}{\beta^2} \cdot C_3 + \alpha\beta \cdot C_4 \right) \frac{30}{\lambda_{\hat{A}}} \gamma^2 \rho_{\max}^2 \right] \mathbb{E} \|\tilde{z}^{(m-1)}\|^2 \\
& \quad + \frac{4}{\lambda_C} \left( \frac{\alpha^2}{\beta^2} \cdot C_3 + \beta \cdot C_4 \right) \left( \frac{6}{\lambda_{\hat{A}}} \frac{1}{\alpha M} \left[ 1 + \alpha^2 M \cdot 5(1+\gamma)^2 \rho_{\max}^2 \left(1 + \frac{\gamma \rho_{\max}}{\min|\lambda(C)|}\right)^2 \right] + 1 \right) \mathbb{E} \|\tilde{\theta}^{(m-1)} - \theta^*\|^2 \\
& \quad + \frac{40}{\lambda_C} K_2 \frac{\beta}{M} + \frac{40}{\lambda_C} \left( \rho_{\max} \frac{1+\gamma}{\min|\lambda(C)|} \right)^2 K_1 \left(1 + \frac{2}{\lambda_C}\right) \frac{\alpha^2}{\beta^2} \frac{1}{M} + \frac{\alpha}{M} \left( \frac{\alpha^2}{\beta^2} \cdot C_3 + \beta \cdot C_4 \right) \cdot \frac{4}{\lambda_C} \frac{30}{\lambda_{\hat{A}}} K_1.
\end{aligned}$$

621 Define  $F := \frac{4}{\lambda_C} \left[ \frac{1}{\beta M} + \beta \cdot 10 + \frac{\alpha^2}{\beta^2} \cdot 10\gamma^2 \rho_{\max}^2 \left(1 + \frac{2}{\lambda_C}\right) \cdot \left(\rho_{\max} \frac{1+\gamma}{\min|\lambda(C)|}\right)^2 + \left( \frac{\alpha^3}{\beta^2} \cdot C_3 + \alpha\beta \cdot \right.$

622  $C_4 \right) \frac{30}{\lambda_{\hat{A}}} \gamma^2 \rho_{\max}^2 \Big]$ . The above inequality can be simplified as

$$\begin{aligned}
& \mathbb{E} \|\tilde{z}^{(m)}\|^2 \\
& \leq F \cdot \mathbb{E} \|\tilde{z}^{(m-1)}\|^2 \\
& \quad + \frac{4}{\lambda_C} \left( \frac{\alpha^2}{\beta^2} \cdot C_3 + \beta \cdot C_4 \right) \left( \frac{6}{\lambda_{\hat{A}}} \frac{1}{\alpha M} \left[ 1 + \alpha^2 M \cdot 5(1+\gamma)^2 \rho_{\max}^2 \left(1 + \frac{\gamma \rho_{\max}}{\min|\lambda(C)|}\right)^2 \right] + 1 \right) \mathbb{E} \|\tilde{\theta}^{(m-1)} - \theta^*\|^2 \\
& \quad + \frac{40}{\lambda_C} K_2 \frac{\beta}{M} + \frac{40}{\lambda_C} \left( \rho_{\max} \frac{1+\gamma}{\min|\lambda(C)|} \right)^2 K_1 \left(1 + \frac{2}{\lambda_C}\right) \frac{\alpha^2}{\beta^2} \frac{1}{M} + \frac{\alpha}{M} \left( \frac{\alpha^2}{\beta^2} \cdot C_3 + \beta \cdot C_4 \right) \cdot \frac{4}{\lambda_C} \frac{30}{\lambda_{\hat{A}}} K_1.
\end{aligned}$$

623 Lastly, recall that we already have the preliminary convergence bound of  $\mathbb{E} \|\tilde{\theta}^{(m-1)} - \theta^*\|^2$  in Lemma

624 D.4. Apply this result to the above inequality yields that

$$\begin{aligned}
& \mathbb{E} \|\tilde{z}^{(m)}\|^2 \\
& \leq F \cdot \mathbb{E} \|\tilde{z}^{(m-1)}\|^2 \\
& \quad + \frac{4}{\lambda_C} \left( \frac{\alpha^2}{\beta^2} \cdot C_3 + \beta \cdot C_4 \right) \left( \frac{6}{\lambda_{\hat{A}}} \frac{1}{\alpha M} \left[ 1 + \alpha^2 M \cdot 5(1+\gamma)^2 \rho_{\max}^2 \left(1 + \frac{\gamma \rho_{\max}}{\min|\lambda(C)|}\right)^2 \right] + 1 \right) \left[ D^{m-1} \cdot \mathbb{E} \|\tilde{\theta}^{(0)} - \theta^*\|^2 \right. \\
& \quad + \frac{12}{\lambda_{\hat{A}}} \left\{ \frac{2\rho_{\max}^2 \gamma^2}{\lambda_{\hat{A}}} \frac{3}{\lambda_C} \left[ \frac{1}{\beta M} + \beta \cdot 10 + \frac{\alpha^2}{\beta^2} \cdot 10\gamma^2 \rho_{\max}^2 \left(1 + \frac{2}{\lambda_C}\right) \cdot \left(\rho_{\max} \frac{1+\gamma}{\min|\lambda(C)|}\right)^2 \right] + \alpha \cdot 5\gamma^2 \rho_{\max}^2 \right\} \\
& \quad \times \left\{ \frac{D^{m-1} - E^{m-1}}{D - E} \mathbb{E} \|\tilde{z}^{(0)}\|^2 + \frac{2}{1-D} \cdot \left[ \beta \cdot \frac{24}{\lambda_C} H_{\text{VR}}^2 + \frac{\alpha^2}{\beta^2} \cdot \left(1 + \frac{2}{\lambda_C}\right) \cdot \frac{2}{\lambda_C} \left(\rho_{\max} \frac{1+\gamma}{\min|\lambda(C)|}\right)^2 G_{\text{VR}}^2 \right] \right\} \\
& \quad + \frac{1}{1-D} \left\{ \frac{\beta}{M} \cdot \frac{12}{\lambda_{\hat{A}}} \frac{60\rho_{\max}^2 \gamma^2}{\lambda_{\hat{A}} \lambda_C} \cdot K_2 + \frac{\alpha^2}{\beta^2} \frac{1}{M} \cdot \frac{12}{\lambda_{\hat{A}}} \frac{60\rho_{\max}^2 \gamma^2}{\lambda_{\hat{A}} \lambda_C} \cdot \left(\rho_{\max} \frac{1+\gamma}{\min|\lambda(C)|}\right)^2 K_1 \left(1 + \frac{2}{\lambda_C}\right) + \frac{\alpha}{M} \cdot \frac{60K_1}{\lambda_{\hat{A}}} \right\} \Big]
\end{aligned}$$

$$+ \frac{40}{\lambda_C} K_2 \frac{\beta}{M} + \frac{40}{\lambda_C} \left( \rho_{\max} \frac{1+\gamma}{\min |\lambda(C)|} \right)^2 K_1 \left( 1 + \frac{2}{\lambda_C} \right) \frac{\alpha^2}{\beta^2} \frac{1}{M} + \frac{\alpha}{M} \left( \frac{\alpha^2}{\beta^2} \cdot C_3 + \beta \cdot C_4 \right) \cdot \frac{4}{\lambda_C} \frac{30}{\lambda_{\hat{A}}} K_1.$$

625 Telescoping the above inequality, we obtain the final non-asymptotic bound of  $\mathbb{E}\|\tilde{z}^{(m)}\|^2$  as

$$\begin{aligned} & \mathbb{E}\|\tilde{z}^{(m)}\|^2 \\ & \leq F^m \cdot \mathbb{E}\|\tilde{z}^{(0)}\|^2 \\ & \quad + \frac{4}{\lambda_C} \left( \frac{\alpha^2}{\beta^2} \cdot C_3 + \beta \cdot C_4 \right) \left( \frac{6}{\lambda_{\hat{A}}} \frac{1}{\alpha M} \left[ 1 + \alpha^2 M \cdot 5(1+\gamma)^2 \rho_{\max}^2 \left( 1 + \frac{\gamma \rho_{\max}}{\min |\lambda(C)|} \right)^2 \right] + 1 \right) \left[ \frac{D^m - F^m}{D - F} \cdot \mathbb{E}\|\tilde{\theta}^{(0)} - \theta^*\|^2 \right. \\ & \quad + \frac{12}{\lambda_{\hat{A}}} \left\{ \frac{2\rho_{\max}^2 \gamma^2}{\lambda_{\hat{A}}} \frac{3}{\lambda_C} \left[ \frac{1}{\beta M} + \beta \cdot 10 + \frac{\alpha^2}{\beta^2} \cdot 10\gamma^2 \rho_{\max}^2 \left( 1 + \frac{2}{\lambda_C} \right) \cdot \left( \rho_{\max} \frac{1+\gamma}{\min |\lambda(C)|} \right)^2 \right] + \alpha \cdot 5\gamma^2 \rho_{\max}^2 \right\} \\ & \quad \times \left\{ \frac{\frac{D^m - F^m}{D - F} - \frac{E^m - F^m}{E - F}}{D - E} \mathbb{E}\|\tilde{z}^{(0)}\|^2 + \frac{1}{1 - F} \frac{2}{1 - D} \cdot \left[ \beta \cdot \frac{24}{\lambda_C} H_{\text{VR}}^2 + \frac{\alpha^2}{\beta^2} \cdot \left( 1 + \frac{2}{\lambda_C} \right) \cdot \frac{2}{\lambda_C} \left( \rho_{\max} \frac{1+\gamma}{\min |\lambda(C)|} \right)^2 G_{\text{VR}}^2 \right] \right\} \\ & \quad + \frac{1}{1 - F} \frac{1}{1 - D} \left\{ \frac{\beta}{M} \cdot \frac{12}{\lambda_{\hat{A}}} \frac{60\rho_{\max}^2 \gamma^2}{\lambda_{\hat{A}} \lambda_C} \cdot K_2 + \frac{\alpha^2}{\beta^2} \frac{1}{M} \cdot \frac{12}{\lambda_{\hat{A}}} \frac{60\rho_{\max}^2 \gamma^2}{\lambda_{\hat{A}} \lambda_C} \cdot \left( \rho_{\max} \frac{1+\gamma}{\min |\lambda(C)|} \right)^2 K_1 \left( 1 + \frac{2}{\lambda_C} \right) + \frac{\alpha}{M} \cdot \frac{60K_1}{\lambda_{\hat{A}}} \right\} \\ & \quad + \frac{1}{1 - F} \left[ \frac{\beta}{M} \cdot \frac{40}{\lambda_C} K_2 + \frac{\alpha^2}{\beta^2} \frac{1}{M} \cdot \frac{40}{\lambda_C} \left( \rho_{\max} \frac{1+\gamma}{\min |\lambda(C)|} \right)^2 K_1 \left( 1 + \frac{2}{\lambda_C} \right) + \frac{\alpha}{M} \left( \frac{\alpha^2}{\beta^2} \cdot C_3 + \beta \cdot C_4 \right) \cdot \frac{4}{\lambda_C} \frac{30}{\lambda_{\hat{A}}} K_1 \right]. \end{aligned}$$

626 Lastly, we make the following assumption to further simplify the inequality above. We note that these  
627 requirements for the learning rate  $\alpha, \beta$  and the batch size  $M$  are not necessary; they are only used for  
628 simplification.

$$\begin{aligned} 629 & \bullet \frac{6}{\lambda_{\hat{A}}} \frac{1}{\alpha M} \left[ 1 + \alpha^2 M \cdot 5(1+\gamma)^2 \rho_{\max}^2 \left( 1 + \frac{\gamma \rho_{\max}}{\min |\lambda(C)|} \right)^2 \right] + 1 \leq 2, \\ 630 & \bullet \frac{8}{\lambda_C} \left( \frac{\alpha^2}{\beta^2} \cdot C_3 + \beta \cdot C_4 \right) \cdot \frac{1}{1 - F} \frac{1}{1 - D} \frac{\beta}{M} \cdot \frac{12}{\lambda_{\hat{A}}} \frac{60\rho_{\max}^2 \gamma^2}{\lambda_{\hat{A}} \lambda_C} \cdot K_2 \leq \frac{1}{1 - F} \frac{\beta}{M} \cdot \frac{40}{\lambda_C} K_2, \\ 631 & \bullet \frac{8}{\lambda_C} \left( \frac{\alpha^2}{\beta^2} \cdot C_3 + \beta \cdot C_4 \right) \cdot \frac{1}{1 - F} \frac{1}{1 - D} \frac{\alpha^2}{\beta^2} \frac{1}{M} \cdot \frac{12}{\lambda_{\hat{A}}} \frac{60\rho_{\max}^2 \gamma^2}{\lambda_{\hat{A}} \lambda_C} \cdot \left( \rho_{\max} \frac{1+\gamma}{\min |\lambda(C)|} \right)^2 K_1 \left( 1 + \frac{2}{\lambda_C} \right) \leq \\ 632 & \frac{1}{1 - F} \frac{\alpha^2}{\beta^2} \frac{1}{M} \cdot \frac{40}{\lambda_C} \left( \rho_{\max} \frac{1+\gamma}{\min |\lambda(C)|} \right)^2 K_1 \left( 1 + \frac{2}{\lambda_C} \right). \end{aligned}$$

633 Apply these conditions to the above inequality yields that

$$\begin{aligned} & \mathbb{E}\|\tilde{z}^{(m)}\|^2 \\ & \leq F^m \cdot \mathbb{E}\|\tilde{z}^{(0)}\|^2 + \frac{8}{\lambda_C} \left( \frac{\alpha^2}{\beta^2} \cdot C_3 + \beta \cdot C_4 \right) \left[ \frac{D^m - F^m}{D - F} \cdot \mathbb{E}\|\tilde{\theta}^{(0)} - \theta^*\|^2 \right] \\ & \quad + \frac{8}{\lambda_C} \left( \frac{\alpha^2}{\beta^2} \cdot C_3 + \beta \cdot C_4 \right) \frac{12}{\lambda_{\hat{A}}} \left\{ \frac{2\rho_{\max}^2 \gamma^2}{\lambda_{\hat{A}}} \frac{3}{\lambda_C} \left[ \frac{1}{\beta M} + \beta \cdot 10 + \frac{\alpha^2}{\beta^2} \cdot 10\gamma^2 \rho_{\max}^2 \left( 1 + \frac{2}{\lambda_C} \right) \cdot \left( \rho_{\max} \frac{1+\gamma}{\min |\lambda(C)|} \right)^2 \right] \right. \\ & \quad \left. + \alpha \cdot 5\gamma^2 \rho_{\max}^2 \right\} \\ & \quad \times \left\{ \frac{\frac{D^m - F^m}{D - F} - \frac{E^m - F^m}{E - F}}{D - E} \mathbb{E}\|\tilde{z}^{(0)}\|^2 + \frac{1}{1 - F} \frac{2}{1 - D} \cdot \left[ \beta \cdot \frac{24}{\lambda_C} H_{\text{VR}}^2 + \frac{\alpha^2}{\beta^2} \cdot \left( 1 + \frac{2}{\lambda_C} \right) \cdot \frac{2}{\lambda_C} \left( \rho_{\max} \frac{1+\gamma}{\min |\lambda(C)|} \right)^2 G_{\text{VR}}^2 \right] \right\} \\ & \quad + \frac{\alpha}{M} \left( \frac{\alpha^2}{\beta^2} \cdot C_3 + \beta \cdot C_4 \right) \cdot \frac{1}{1 - F} \left( \frac{1}{1 - D} \frac{8}{\lambda_C} \frac{60K_1}{\lambda_{\hat{A}}} + \frac{4}{\lambda_C} \frac{30}{\lambda_{\hat{A}}} K_1 \right) \\ & \quad + \frac{1}{1 - F} \left[ \frac{\beta}{M} \cdot \frac{80}{\lambda_C} K_2 + \frac{\alpha^2}{\beta^2} \frac{1}{M} \cdot \frac{80}{\lambda_C} \left( \rho_{\max} \frac{1+\gamma}{\min |\lambda(C)|} \right)^2 K_1 \left( 1 + \frac{2}{\lambda_C} \right) \right]. \end{aligned}$$

634 Further note that  $1 < \frac{1}{1-D}$  and  $\alpha \leq 1$ , the above inequality implies that

$$\begin{aligned} & \mathbb{E}\|\tilde{z}^{(m)}\|^2 \\ & \leq F^m \cdot \mathbb{E}\|\tilde{z}^{(0)}\|^2 + \frac{8}{\lambda_C} \left( \frac{\alpha^2}{\beta^2} \cdot C_3 + \beta \cdot C_4 \right) \left[ \frac{D^m - F^m}{D - F} \cdot \mathbb{E}\|\tilde{\theta}^{(0)} - \theta^*\|^2 \right] \end{aligned}$$

$$\begin{aligned}
& + \frac{8}{\lambda_C} \left( \frac{\alpha^2}{\beta^2} \cdot C_3 + \beta \cdot C_4 \right) \frac{12}{\lambda_{\hat{A}}} \left\{ \frac{2\rho_{\max}^2 \gamma^2}{\lambda_{\hat{A}}} \frac{3}{\lambda_C} \left[ \frac{1}{\beta M} + \beta \cdot 10 + \frac{\alpha^2}{\beta^2} \cdot 10\gamma^2 \rho_{\max}^2 \left(1 + \frac{2}{\lambda_C}\right) \cdot \left(\rho_{\max} \frac{1+\gamma}{\min|\lambda(C)|}\right)^2 \right] \right. \\
& \quad \left. + \alpha \cdot 5\gamma^2 \rho_{\max}^2 \right\} \\
& \times \left\{ \frac{\frac{D^m - F^m}{D-F} - \frac{E^m - F^m}{E-F}}{D-E} \mathbb{E} \|\tilde{z}^{(0)}\|^2 + \frac{1}{1-F} \frac{2}{1-D} \cdot \left[ \beta \cdot \frac{24}{\lambda_C} H_{\text{VR}}^2 + \frac{\alpha^2}{\beta^2} \cdot \left(1 + \frac{2}{\lambda_C}\right) \cdot \frac{2}{\lambda_C} \left(\rho_{\max} \frac{1+\gamma}{\min|\lambda(C)|}\right)^2 G_{\text{VR}}^2 \right] \right\} \\
& + \frac{1}{1-F} \frac{1}{1-D} \left[ \frac{\beta}{M} \cdot \left( \frac{80}{\lambda_C} K_2 + C_4 \frac{600}{\lambda_C} \frac{K_1}{\lambda_{\hat{A}}} \right) + \frac{\alpha^2}{\beta^2} \frac{1}{M} \cdot \left( \frac{80}{\lambda_C} \left(\rho_{\max} \frac{1+\gamma}{\min|\lambda(C)|}\right)^2 K_1 \left(1 + \frac{2}{\lambda_C}\right) + C_3 \frac{600}{\lambda_C} \frac{K_1}{\lambda_{\hat{A}}} \right) \right].
\end{aligned}$$

635 Assume that  $\alpha \cdot 5\gamma^2 \rho_{\max}^2 \leq \frac{2\rho_{\max}^2 \gamma^2}{\lambda_{\hat{A}}} \frac{3}{\lambda_C} \left[ \beta \cdot 10 + \frac{\alpha^2}{\beta^2} \cdot 10\gamma^2 \rho_{\max}^2 \left(1 + \frac{2}{\lambda_C}\right) \cdot \left(\rho_{\max} \frac{1+\gamma}{\min|\lambda(C)|}\right)^2 \right]$ . Then,  
636 we further obtain from the above inequality that

$$\begin{aligned}
& \mathbb{E} \|\tilde{z}^{(m)}\|^2 \\
& \leq F^m \cdot \mathbb{E} \|\tilde{z}^{(0)}\|^2 + \frac{8}{\lambda_C} \left( \frac{\alpha^2}{\beta^2} \cdot C_3 + \beta \cdot C_4 \right) \left[ \frac{D^m - F^m}{D-F} \cdot \mathbb{E} \|\tilde{\theta}^{(0)} - \theta^*\|^2 \right] \\
& \quad + \frac{8}{\lambda_C} \left( \frac{\alpha^2}{\beta^2} \cdot C_3 + \beta \cdot C_4 \right) \frac{12}{\lambda_{\hat{A}}} \frac{2\rho_{\max}^2 \gamma^2}{\lambda_{\hat{A}}} \frac{3}{\lambda_C} \left[ \frac{1}{\beta M} + \beta \cdot 20 + \frac{\alpha^2}{\beta^2} \cdot 20\gamma^2 \rho_{\max}^2 \left(1 + \frac{2}{\lambda_C}\right) \cdot \left(\rho_{\max} \frac{1+\gamma}{\min|\lambda(C)|}\right)^2 \right] \\
& \quad \times \left\{ \frac{\frac{D^m - F^m}{D-F} - \frac{E^m - F^m}{E-F}}{D-E} \mathbb{E} \|\tilde{z}^{(0)}\|^2 + \frac{1}{1-F} \frac{2}{1-D} \cdot \left[ \beta \cdot \frac{24}{\lambda_C} H_{\text{VR}}^2 + \frac{\alpha^2}{\beta^2} \cdot \left(1 + \frac{2}{\lambda_C}\right) \cdot \frac{2}{\lambda_C} \left(\rho_{\max} \frac{1+\gamma}{\min|\lambda(C)|}\right)^2 G_{\text{VR}}^2 \right] \right\} \\
& \quad + \frac{1}{1-F} \frac{1}{1-D} \left[ \frac{\beta}{M} \cdot \left( \frac{80}{\lambda_C} K_2 + C_4 \frac{600}{\lambda_C} \frac{K_1}{\lambda_{\hat{A}}} \right) + \frac{\alpha^2}{\beta^2} \frac{1}{M} \cdot \left( \frac{80}{\lambda_C} \left(\rho_{\max} \frac{1+\gamma}{\min|\lambda(C)|}\right)^2 K_1 \left(1 + \frac{2}{\lambda_C}\right) + C_3 \frac{600}{\lambda_C} \frac{K_1}{\lambda_{\hat{A}}} \right) \right] \\
& = F^m \cdot \mathbb{E} \|\tilde{z}^{(0)}\|^2 + \frac{8}{\lambda_C} \left( \frac{\alpha^2}{\beta^2} \cdot C_3 + \beta \cdot C_4 \right) \left[ \frac{D^m - F^m}{D-F} \cdot \mathbb{E} \|\tilde{\theta}^{(0)} - \theta^*\|^2 \right] \\
& \quad + \frac{576}{\lambda_{\hat{A}}^2} \frac{\rho_{\max}^2 \gamma^2}{\lambda_C^2} \left( \frac{\alpha^2}{\beta^2} \cdot C_3 + \beta \cdot C_4 \right) \left[ \frac{1}{\beta M} + \beta \cdot 20 + \frac{\alpha^2}{\beta^2} \cdot 20\gamma^2 \rho_{\max}^2 \left(1 + \frac{2}{\lambda_C}\right) \cdot \left(\rho_{\max} \frac{1+\gamma}{\min|\lambda(C)|}\right)^2 \right] \\
& \quad \times \left\{ \frac{\frac{D^m - F^m}{D-F} - \frac{E^m - F^m}{E-F}}{D-E} \mathbb{E} \|\tilde{z}^{(0)}\|^2 + \frac{1}{1-F} \frac{2}{1-D} \cdot \left[ \beta \cdot \frac{24}{\lambda_C} H_{\text{VR}}^2 + \frac{\alpha^2}{\beta^2} \cdot \left(1 + \frac{2}{\lambda_C}\right) \cdot \frac{2}{\lambda_C} \left(\rho_{\max} \frac{1+\gamma}{\min|\lambda(C)|}\right)^2 G_{\text{VR}}^2 \right] \right\} \\
& \quad + \frac{1}{1-F} \frac{1}{1-D} \left[ \frac{\beta}{M} \cdot \left( \frac{80}{\lambda_C} K_2 + C_4 \frac{600}{\lambda_C} \frac{K_1}{\lambda_{\hat{A}}} \right) + \frac{\alpha^2}{\beta^2} \frac{1}{M} \cdot \left( \frac{80}{\lambda_C} \left(\rho_{\max} \frac{1+\gamma}{\min|\lambda(C)|}\right)^2 K_1 \left(1 + \frac{2}{\lambda_C}\right) + C_3 \frac{600}{\lambda_C} \frac{K_1}{\lambda_{\hat{A}}} \right) \right].
\end{aligned}$$

637 Lastly, assume that  $\frac{576}{\lambda_{\hat{A}}^2} \frac{\rho_{\max}^2 \gamma^2}{\lambda_C^2} \left( \frac{\alpha^2}{\beta^2} \cdot C_3 + \beta \cdot C_4 \right) \left[ \frac{1}{\beta M} + \beta \cdot 20 + \frac{\alpha^2}{\beta^2} \cdot 20\gamma^2 \rho_{\max}^2 \left(1 + \frac{2}{\lambda_C}\right) \cdot \right.$   
638  $\left. \left(\rho_{\max} \frac{1+\gamma}{\min|\lambda(C)|}\right)^2 \right] < 1$  and  $\frac{8}{\lambda_C} \left( \frac{\alpha^2}{\beta^2} \cdot C_3 + \beta \cdot C_4 \right) < 1$ , the above inequality further implies  
639 that

$$\begin{aligned}
& \mathbb{E} \|\tilde{z}^{(m)}\|^2 \\
& \leq F^m \cdot \mathbb{E} \|\tilde{z}^{(0)}\|^2 + \frac{D^m - F^m}{D-F} \cdot \mathbb{E} \|\tilde{\theta}^{(0)} - \theta^*\|^2 + \frac{\frac{D^m - F^m}{D-F} - \frac{E^m - F^m}{E-F}}{D-E} \mathbb{E} \|\tilde{z}^{(0)}\|^2 \\
& \quad + \frac{1}{1-F} \frac{1}{1-D} \frac{1152}{\lambda_{\hat{A}}^2} \frac{\rho_{\max}^2 \gamma^2}{\lambda_C^2} \left( \frac{\alpha^2}{\beta^2} \cdot C_3 + \beta \cdot C_4 \right) \left[ \frac{1}{\beta M} + \beta \cdot 20 + \frac{\alpha^2}{\beta^2} \cdot 20\gamma^2 \rho_{\max}^2 \left(1 + \frac{2}{\lambda_C}\right) \cdot \left(\rho_{\max} \frac{1+\gamma}{\min|\lambda(C)|}\right)^2 \right] \\
& \quad \times \left[ \beta \cdot \frac{24}{\lambda_C} H_{\text{VR}}^2 + \frac{\alpha^2}{\beta^2} \cdot \left(1 + \frac{2}{\lambda_C}\right) \cdot \frac{2}{\lambda_C} \left(\rho_{\max} \frac{1+\gamma}{\min|\lambda(C)|}\right)^2 G_{\text{VR}}^2 \right] \\
& \quad + \frac{1}{1-F} \frac{1}{1-D} \left[ \frac{\beta}{M} \cdot \left( \frac{80}{\lambda_C} K_2 + C_4 \frac{600}{\lambda_C} \frac{K_1}{\lambda_{\hat{A}}} \right) + \frac{\alpha^2}{\beta^2} \frac{1}{M} \cdot \left( \frac{80}{\lambda_C} \left(\rho_{\max} \frac{1+\gamma}{\min|\lambda(C)|}\right)^2 K_1 \left(1 + \frac{2}{\lambda_C}\right) + C_3 \frac{600}{\lambda_C} \frac{K_1}{\lambda_{\hat{A}}} \right) \right].
\end{aligned}$$

640

□

## 641 E Other Supporting Lemmas for Proving Theorem 3.1

642 **Lemma E.1** (One-Step Update of  $\theta_t^{(m)}$ ). *Under the same assumptions as those of Theorem 3.1, the*  
 643 *square norm of one-step update of  $\theta_t^{(m)}$  in Algorithm 1 can be bounded as*

$$\begin{aligned} & \mathbb{E}_{m,0} \|G_t^{(m)}(\theta_t^{(m)}, z_t^{(m)}) - G_t^{(m)}(\tilde{\theta}^{(m-1)}, \tilde{z}^{(m-1)}) + G^{(m)}(\tilde{\theta}^{(m-1)}, \tilde{z}^{(m-1)})\|^2 \\ & \leq 5(1+\gamma)^2 \rho_{\max}^2 \left(1 + \frac{\gamma \rho_{\max}}{\min |\lambda(C)|}\right)^2 (\mathbb{E}_{m,0} \|\theta_t^{(m)} - \theta^*\|^2 + \mathbb{E}_{m,0} \|\tilde{\theta}^{(m-1)} - \theta^*\|^2) \\ & \quad + 5\gamma^2 \rho_{\max}^2 (\mathbb{E}_{m,0} \|z_t^{(m)}\|^2 + \mathbb{E}_{m,0} \|\tilde{z}^{(m-1)}\|^2) + \frac{1}{M} \cdot 5K_1, \end{aligned}$$

644 where

$$K_1 := [(1+\gamma)R_\theta + r_{\max}]^2 \rho_{\max}^2 \left(1 + \frac{\gamma \rho_{\max}}{\min |\lambda(C)|}\right)^2. \quad (26)$$

645 *Proof.* Substituting the definitions of  $G_t^{(m)}(\cdot)$  and  $G^{(m)}(\cdot)$  into the update of  $\theta_t^{(m)}$  yields that

$$\begin{aligned} & \|G_t^{(m)}(\theta_t^{(m)}, z_t^{(m)}) - G_t^{(m)}(\tilde{\theta}^{(m-1)}, \tilde{z}^{(m-1)}) + G^{(m)}(\tilde{\theta}^{(m-1)}, \tilde{z}^{(m-1)})\|^2 \\ & = \|\hat{A}_t^{(m)} \theta_t^{(m)} + \hat{b}_t^{(m)} + B_t^{(m)} z_t^{(m)} - \hat{A}_t^{(m)} \tilde{\theta}^{(m-1)} - \hat{b}_t^{(m)} - B_t^{(m)} \tilde{z}^{(m-1)} + \hat{A}^{(m)} \tilde{\theta}^{(m-1)} + \hat{b}^{(m)} + B^{(m)} \tilde{z}^{(m-1)}\|^2 \\ & = \|(\hat{A}_t^{(m)} \theta_t^{(m)} - \hat{A}_t^{(m)} \theta^*) + (\hat{A}_t^{(m)} \theta^* - \hat{A}_t^{(m)} \tilde{\theta}^{(m-1)} + \hat{A}^{(m)} \tilde{\theta}^{(m-1)} - \hat{A}^{(m)} \theta^*) + (\hat{A}^{(m)} \theta^* + \hat{b}^{(m)}) \\ & \quad + B_t^{(m)} z_t^{(m)} - B_t^{(m)} \tilde{z}^{(m-1)} + B^{(m)} \tilde{z}^{(m-1)}\|^2 \\ & \leq 5\|\hat{A}_t^{(m)}\|^2 \|\theta_t^{(m)} - \theta^*\|^2 + 5\|(\hat{A}_t^{(m)} \tilde{\theta}^{(m-1)} - \hat{A}_t^{(m)} \theta^*) - (\hat{A}^{(m)} \tilde{\theta}^{(m-1)} - \hat{A}^{(m)} \theta^*)\|^2 + 5\|\hat{A}^{(m)} \theta^* + \hat{b}^{(m)}\|^2 \\ & \quad + 5\|B_t^{(m)}\|^2 \|z_t^{(m)}\|^2 + 5\|B_t^{(m)} \tilde{z}^{(m-1)} - B^{(m)} \tilde{z}^{(m-1)}\|^2, \end{aligned} \quad (27)$$

646 where the last inequality uses Jensen's inequality  $\|\sum_{i=1}^n a_i\|^2 = \|\frac{1}{n} \sum_{i=1}^n (na_i)\|^2 \leq n \sum_{i=1}^n \|a_i\|^2$ .  
 647 Next, we bound the third term of the right hand side of the above inequality as follows:

$$\begin{aligned} & \|\hat{A}^{(m)} \theta^* + \hat{b}^{(m)}\|^2 \\ & \leq \left\| \sum_{t=0}^{M-1} \hat{A}_t^{(m)} \theta^* + \sum_{t=0}^{M-1} \hat{b}_t^{(m)} \right\|^2 \\ & = \frac{1}{M^2} \left[ \sum_{i=j} \|\hat{A}_i^{(m)} \theta^* + \hat{b}_i^{(m)}\|^2 + \sum_{i \neq j} \langle \hat{A}_i^{(m)} \theta^* + \hat{b}_i^{(m)}, \hat{A}_j^{(m)} \theta^* + \hat{b}_j^{(m)} \rangle \right] \\ & \leq \frac{1}{M} \cdot [(1+\gamma)R_\theta + r_{\max}]^2 \rho_{\max}^2 \left(1 + \frac{\gamma \rho_{\max}}{\min |\lambda(C)|}\right)^2 + \frac{1}{M^2} \sum_{i \neq j} \langle \hat{A}_i^{(m)} \theta^* + \hat{b}_i^{(m)}, \hat{A}_j^{(m)} \theta^* + \hat{b}_j^{(m)} \rangle, \end{aligned} \quad (28)$$

648 where in the last inequality we use Lemma J.2 to bound  $\|\hat{A}_i^{(m)} \theta^* + \hat{b}_i^{(m)}\|$ . Next, consider the  
 649 conditional expectation of the second term of the above inequality, and, without loss of generality,  
 650 assume  $i < j$ , we obtain that

$$\begin{aligned} & \mathbb{E}_{m,0} \langle \hat{A}_i^{(m)} \theta^* + \hat{b}_i^{(m)}, \hat{A}_j^{(m)} \theta^* + \hat{b}_j^{(m)} \rangle \\ & = \mathbb{E}_{m,0} \langle \hat{A}_i^{(m)} \theta^* + \hat{b}_i^{(m)}, \mathbb{E}_{m,i} [\hat{A}_j^{(m)} \theta^* + \hat{b}_j^{(m)}] \rangle \\ & = \mathbb{E}_{m,0} \langle \hat{A}_i^{(m)} \theta^* + \hat{b}_i^{(m)}, \hat{A} \theta^* + \hat{b} \rangle \\ & = 0, \end{aligned}$$

651 which follows from the i.i.d. sampling scheme. Substituting the above result into (28), we obtain that

$$\mathbb{E}_{m,0} \|\hat{A}^{(m)} \theta^* + \hat{b}^{(m)}\|^2 \leq \frac{1}{M} \cdot [(1+\gamma)R_\theta + r_{\max}]^2 \rho_{\max}^2 \left(1 + \frac{\gamma \rho_{\max}}{\min |\lambda(C)|}\right)^2. \quad (29)$$

652 On the other hand, note that  $\text{Var} X \leq \mathbb{E} X^2$ , we have

$$\mathbb{E}_{m,t-1} \|(\hat{A}_t^{(m)} \tilde{\theta}^{(m-1)} - \hat{A}_t^{(m)} \theta^*) - (\hat{A}^{(m)} \tilde{\theta}^{(m-1)} - \hat{A}^{(m)} \theta^*)\|^2$$

$$\begin{aligned}
&= \text{Var}_{m,t-1} (\hat{A}_t^{(m)} \tilde{\theta}^{(m-1)} - \hat{A}_t^{(m)} \theta^*) \\
&\leq \mathbb{E}_{m,t-1} (\hat{A}_t^{(m)} \tilde{\theta}^{(m-1)} - \hat{A}_t^{(m)} \theta^*)^2 \\
&\leq \mathbb{E}_{m,t-1} \|\hat{A}_t^{(m)}\|^2 \|\tilde{\theta}^{(m-1)} - \theta^*\|^2
\end{aligned} \tag{30}$$

and similarly,

$$\mathbb{E}_{m,t-1} \|B_t^{(m)} \tilde{z}^{(m-1)} - B_t^{(m)} \tilde{z}^{(m-1)}\|^2 \leq \mathbb{E}_{m,t-1} \|B_t^{(m)}\|^2 \|\tilde{z}^{(m-1)}\|^2. \tag{31}$$

Substituting eqs. (29), (30), (31) into (27) yields that

$$\begin{aligned}
&\mathbb{E}_{m,0} \|G_t^{(m)}(\theta_t^{(m)}, z_t^{(m)}) - G_t^{(m)}(\tilde{\theta}^{(m-1)}, \tilde{z}^{(m-1)}) + G^{(m)}(\tilde{\theta}^{(m-1)}, \tilde{z}^{(m-1)})\|^2 \\
&\leq 5(1+\gamma)^2 \rho_{\max}^2 \left(1 + \frac{\gamma \rho_{\max}}{\min |\lambda(C)|}\right)^2 (\mathbb{E}_{m,0} \|\theta_t^{(m)} - \theta^*\|^2 + \mathbb{E}_{m,0} \|\tilde{\theta}^{(m-1)} - \theta^*\|^2) \\
&\quad + 5\gamma^2 \rho_{\max}^2 (\mathbb{E}_{m,0} \|z_t^{(m)}\|^2 + \mathbb{E}_{m,0} \|\tilde{z}^{(m-1)}\|^2) + \frac{1}{M} \cdot 5[(1+\gamma)R_\theta + r_{\max}]^2 \rho_{\max}^2 \left(1 + \frac{\gamma \rho_{\max}}{\min |\lambda(C)|}\right)^2.
\end{aligned}$$

□

**Lemma E.2** (One-Step Update of  $z_t^{(m)}$ ). *Under the same assumptions as those of Theorem 3.1, the square norm of one-step update of  $z_t^{(m)}$  in Algorithm 1 is bounded as*

$$\begin{aligned}
&\mathbb{E}_{m,0} \|H_t^{(m)}(\theta_t^{(m)}, z_t^{(m)}) - H_t^{(m)}(\tilde{\theta}^{(m-1)}, \tilde{z}^{(m-1)}) + H^{(m)}(\tilde{\theta}^{(m-1)}, \tilde{z}^{(m-1)})\|^2 \\
&\leq 5(1+\gamma)^2 \rho_{\max}^2 \left(1 + \frac{1}{\min |\lambda(C)|}\right)^2 (\mathbb{E}_{m,0} \|\theta_t^{(m)} - \theta^*\|^2 + \mathbb{E}_{m,0} \|\tilde{\theta}^{(m-1)} - \theta^*\|^2) \\
&\quad + 5(\mathbb{E}_{m,0} \|z_t^{(m)}\|^2 + \mathbb{E}_{m,0} \|\tilde{z}^{(m-1)}\|^2) + \frac{5K_2}{M},
\end{aligned}$$

where

$$K_2 := [(1+\gamma)R_\theta + r_{\max}]^2 \left(1 + \frac{1}{\min |\lambda_C|}\right)^2. \tag{32}$$

*Proof.* Follow a similar proof logic as that of Lemma E.1, we obtain the following bound for the square norm of the one-step update of  $z_t^{(m)}$ ,

$$\begin{aligned}
&\|H_t^{(m)}(\theta_t^{(m)}, z_t^{(m)}) - H_t^{(m)}(\tilde{\theta}^{(m-1)}, \tilde{z}^{(m-1)}) + H^{(m)}(\tilde{\theta}^{(m-1)}, \tilde{z}^{(m-1)})\|^2 \\
&\leq 5\|\bar{A}_t^{(m)}\|^2 \|\theta_t^{(m)} - \theta^*\|^2 + 5\|(\bar{A}_t^{(m)} \tilde{\theta}^{(m-1)} - \bar{A}_t^{(m)} \theta^*) - (\bar{A}^{(m)} \tilde{\theta}^{(m-1)} - \bar{A}^{(m)} \theta^*)\|^2 + 5\|\bar{A}^{(m)} \theta^* + \bar{b}^{(m)}\|^2 \\
&\quad + 5\|C_t^{(m)}\|^2 \|z_t^{(m)}\|^2 + 5\|C_t^{(m)} \tilde{z}^{(m-1)} - C^{(m)} \tilde{z}^{(m-1)}\|^2.
\end{aligned} \tag{33}$$

Then, we take  $\mathbb{E}_{m,0}$  on both sides, follow the same steps in the proof of Lemma E.1 and notice that  $\mathbb{E}_{m,0} \|\bar{A}^{(m)} \theta^* + \bar{b}^{(m)}\|^2$  in eq. (33) is bounded by

$$\begin{aligned}
\mathbb{E}_{m,0} \|\bar{A}^{(m)} \theta^* + \bar{b}^{(m)}\|^2 &\leq \frac{1}{M^2} \sum_{i=j} \|\bar{A}_i^{(m)} \theta^* + \bar{b}_i^{(m)}\|^2 \\
&\leq \frac{1}{M} \cdot [(1+\gamma)R_\theta + r_{\max}]^2 \left(1 + \frac{1}{\min |\lambda_C|}\right)^2
\end{aligned}$$

using Lemma J.3. Finally, we obtain that

$$\begin{aligned}
&\mathbb{E}_{m,0} \|H_t^{(m)}(\theta_t^{(m)}, z_t^{(m)}) - H_t^{(m)}(\tilde{\theta}^{(m-1)}, \tilde{z}^{(m-1)}) + H^{(m)}(\tilde{\theta}^{(m-1)}, \tilde{z}^{(m-1)})\|^2 \\
&\leq 5(1+\gamma)^2 \rho_{\max}^2 \left(1 + \frac{1}{\min |\lambda(C)|}\right)^2 (\mathbb{E}_{m,0} \|\theta_t^{(m)} - \theta^*\|^2 + \mathbb{E}_{m,0} \|\tilde{\theta}^{(m-1)} - \theta^*\|^2) \\
&\quad + 5(\mathbb{E}_{m,0} \|z_t^{(m)}\|^2 + \mathbb{E}_{m,0} \|\tilde{z}^{(m-1)}\|^2) + \frac{5}{M} \cdot [(1+\gamma)R_\theta + r_{\max}]^2 \left(1 + \frac{1}{\min |\lambda_C|}\right)^2.
\end{aligned}$$

□

## 665 F Proof of Theorem 4.1

666 We assume the learning rates  $\alpha, \beta$  and the batch size  $M$  satisfy the following conditions.

$$\alpha \leq \min \left\{ \frac{\lambda_{\hat{A}}}{30} / \left[ (1 + \gamma)^2 \rho_{\max}^2 \left( 1 + \frac{\gamma \rho_{\max}}{\min |\lambda(C)|} \right)^2 \right], \frac{3}{5} \frac{1}{\lambda_{\hat{A}}} \right\}, \quad (34)$$

$$\beta \leq 1, \quad (35)$$

$$M\beta > \frac{12}{\lambda_C}, \quad (36)$$

$$\frac{\lambda_C}{48} \beta - 10\beta^2 - 10\gamma^2 \rho_{\max}^2 \left( \rho_{\max} \frac{1 + \gamma}{\min |\lambda(C)|} \right)^2 \left( \alpha^2 + \frac{2\alpha^2}{\lambda_C} \frac{1}{\beta} \right) \geq 0, \quad (37)$$

$$\frac{16}{\lambda_{\hat{A}}} \left\{ \frac{96}{\lambda_{\hat{A}} \lambda_C} \gamma^2 \rho_{\max}^2 \left[ \frac{1}{\beta M} + 10\beta + 10\gamma^2 \rho_{\max}^2 \left( 1 + \frac{2}{\lambda_C} \right) \left( \rho_{\max} \frac{1 + \gamma}{\min |\lambda(C)|} \right)^2 \frac{\alpha^2}{\beta^2} \right] + 5\gamma^2 \rho_{\max}^2 \alpha \right\} \leq 1, \quad (38)$$

$$\begin{aligned} & \left( 1 + \frac{\gamma \rho_{\max}}{\min |\lambda(C)|} \right)^2 \left( 1 + \frac{21}{\lambda_C} \right) \left( \rho_{\max} \frac{1 + \gamma}{\min |\lambda(C)|} \right)^2 \frac{\alpha^2}{\beta^2} + \left( 1 + \frac{1}{\min |\lambda(C)|} \right)^2 \beta^2 \\ & \leq \min \left\{ \frac{\lambda_{\hat{A}}}{48} / \left[ \frac{96}{\lambda_{\hat{A}} \lambda_C} \gamma^2 \rho_{\max}^2 \cdot 10(1 + \gamma)^2 \rho_{\max}^2 \right], \frac{\lambda_C}{48} / \left[ 120(1 + \gamma)^2 \rho_{\max}^2 \frac{1}{\lambda_{\hat{A}}} \right] \right\}, \end{aligned} \quad (39)$$

$$\max\{D, E, F\} < 1, \quad (40)$$

667 where  $D, E, F$  are specified in eq.(44), eq.(46), and eq.(49), respectively. We note that under the  
668 above conditions, all the supporting lemmas for proving the theorem are satisfied. We also note  
669 that for a sufficiently small  $\epsilon$ , our choices of learning rates and batch size  $\alpha = \mathcal{O}(\epsilon^{\frac{3}{4}}), \beta = \mathcal{O}(\epsilon^{\frac{1}{2}}),$   
670  $M = \mathcal{O}(\epsilon^{-1})$  that are stated in the theorem satisfy eqs. (35) to (40).

671 **Proof Sketch** The proof consists of the following key steps.

672 1. Develop *preliminary bound* for  $\sum_{t=0}^{M-1} \|\theta_t^{(m)} - \theta^*\|^2$ . (Lemma H.1)

673 We first bound  $\sum_{t=0}^{M-1} \|\theta_t^{(m)} - \theta^*\|^2$  in terms of  $\sum_{t=0}^{M-1} \|z_t^{(m)}\|^2, \|\tilde{z}^{(m-1)}\|^2$ , and  $\|\tilde{\theta}^{(m-1)} - \theta^*\|^2$ .  
674

675 2. Develop *preliminary bound* for  $\sum_{t=0}^{M-1} \|z_t^{(m)}\|^2$ . (Lemma H.3)

676 Then we bound  $\sum_{t=0}^{M-1} \|z_t^{(m)}\|^2$  in terms of  $\sum_{t=0}^{M-1} \|\theta_t^{(m)} - \theta^*\|^2, \|\tilde{z}^{(m-1)}\|^2$ , and  
677  $\|\tilde{\theta}^{(m-1)} - \theta^*\|^2$ , and plug it into the preliminary bound of  $\sum_{t=0}^{M-1} \|\theta_t^{(m)} - \theta^*\|^2$ . Then, we  
678 obtain an upper bound of  $\sum_{t=0}^{M-1} \|\theta_t^{(m)} - \theta^*\|^2$  in terms of  $\|\tilde{z}^{(m-1)}\|^2$ , and  $\|\tilde{\theta}^{(m-1)} - \theta^*\|^2$ .

679 3. Develop *non-asymptotic bound* for  $\|\tilde{z}^m\|^2$ . (Lemma H.2)

680 Lastly, we develop a non-asymptotic bound for  $\|\tilde{z}^m\|^2$  and plug it into the previous upper  
681 bounds. Then, we obtain a relation between  $\mathbb{E}\|\tilde{\theta}^{(m)} - \theta^*\|$  and  $\mathbb{E}\|\tilde{\theta}^{(m-1)} - \theta^*\|$ . Recursively  
682 telescoping this inequality leads to our final result.

683 By Lemma H.1, we have the following result:

$$\begin{aligned} & \frac{\lambda_{\hat{A}}}{12} \alpha \sum_{t=0}^{M-1} \mathbb{E}_{m,0} \|\theta_t^{(m)} - \theta^*\|^2 \\ & \leq \left[ 1 + \alpha^2 M \cdot 5(1 + \gamma)^2 \rho_{\max}^2 \left( 1 + \frac{\gamma \rho_{\max}}{\min |\lambda(C)|} \right)^2 \right] \mathbb{E}_{m,0} \|\tilde{\theta}^{(m-1)} - \theta^*\|^2 + \alpha \cdot 2K_2 + \alpha^2 \cdot 5K_1 \\ & \quad + \alpha \cdot \frac{6}{\lambda_{\hat{A}}} \gamma^2 \rho_{\max}^2 \sum_{t=0}^{M-1} \mathbb{E}_{m,0} \|z_t^{(m)}\|^2 + \alpha^2 M \cdot 5\gamma^2 \rho_{\max}^2 \mathbb{E}_{m,0} \|\tilde{z}^{(m-1)}\|^2, \end{aligned} \quad (41)$$

684 where  $K_1$  is specified in eq. (63) of Lemma I.1, and  $K_2$  is specified in eq. (67) of Lemma I.2. By  
685 Lemma H.3, we have that

$$\frac{\lambda_C}{16} \beta \sum_{t=0}^{M-1} \mathbb{E}_{m,0} \|z_t^{(m)}\|^2$$



$$\begin{aligned}
&\leq \left[1 + \left[10\beta^2 + 10\gamma^2 \rho_{\max}^2 \left(\alpha^2 + \frac{2\alpha^2}{\lambda_C} \frac{1}{\beta}\right) \cdot \left(\rho_{\max} \frac{1+\gamma}{\min |\lambda(C)|}\right)^2\right] M\right] \mathbb{E}_{m,0} \|\tilde{z}^{(m-1)}\|^2 \\
&\quad + 10(1+\gamma)^2 \rho_{\max}^2 \cdot \left[\left(1 + \frac{\gamma \rho_{\max}}{\min |\lambda(C)|}\right)^2 \left(\alpha^2 + \frac{2\alpha^2}{\lambda_C} \frac{1}{\beta}\right) \cdot \left(\rho_{\max} \frac{1+\gamma}{\min |\lambda(C)|}\right)^2\right. \\
&\quad \left. + \left(1 + \frac{1}{\min |\lambda(C)|}\right)^2 \beta^2\right] \left(\sum_{t=0}^{M-1} \mathbb{E}_{m,0} \|\theta_t^{(m)} - \theta^*\|^2 + M \mathbb{E}_{m,0} \|\tilde{\theta}^{(m-1)} - \theta^*\|^2\right) \\
&\quad + (2K_3 + 2K_4)\beta + 10K_5\beta^2 + 10\left(\rho_{\max} \frac{1+\gamma}{\min |\lambda(C)|}\right)^2 K_1 \left(\alpha^2 + \frac{2\alpha^2}{\lambda_C} \frac{1}{\beta}\right). \tag{42}
\end{aligned}$$

686 Combining eq.(41) and eq.(42), we obtain the following upper bound of  $\sum_{t=0}^{M-1} \|\theta_t^{(m)} - \theta^*\|^2$  in  
687 terms of  $\|\tilde{z}^{(m-1)}\|^2$  and  $\|\tilde{\theta}^{(m-1)} - \theta^*\|^2$ .

$$\begin{aligned}
&\frac{\lambda_{\hat{A}}}{12} \alpha \sum_{t=0}^{M-1} \mathbb{E}_{m,0} \|\theta_t^{(m)} - \theta^*\|^2 \\
&\leq \left[1 + \alpha^2 M \cdot 5(1+\gamma)^2 \rho_{\max}^2 \left(1 + \frac{\gamma \rho_{\max}}{\min |\lambda(C)|}\right)^2\right] \mathbb{E}_{m,0} \|\tilde{\theta}^{(m-1)} - \theta^*\|^2 + \alpha \cdot 2K_2 + \alpha^2 \cdot 5K_1 \\
&\quad + \frac{\alpha}{\beta} \cdot \frac{96}{\lambda_{\hat{A}} \lambda_C} \gamma^2 \rho_{\max}^2 \left\{ \left[1 + \left[10\beta^2 + 10\gamma^2 \rho_{\max}^2 \left(\alpha^2 + \frac{2\alpha^2}{\lambda_C} \frac{1}{\beta}\right) \cdot \left(\rho_{\max} \frac{1+\gamma}{\min |\lambda(C)|}\right)^2\right] M\right] \mathbb{E}_{m,0} \|\tilde{z}^{(m-1)}\|^2\right. \\
&\quad \left. + 10(1+\gamma)^2 \rho_{\max}^2 \cdot \left[\left(1 + \frac{\gamma \rho_{\max}}{\min |\lambda(C)|}\right)^2 \left(\alpha^2 + \frac{2\alpha^2}{\lambda_C} \frac{1}{\beta}\right) \cdot \left(\rho_{\max} \frac{1+\gamma}{\min |\lambda(C)|}\right)^2\right.\right. \\
&\quad \left. + \left(1 + \frac{1}{\min |\lambda(C)|}\right)^2 \beta^2\right] \left(\sum_{t=0}^{M-1} \mathbb{E}_{m,0} \|\theta_t^{(m)} - \theta^*\|^2 + M \mathbb{E}_{m,0} \|\tilde{\theta}^{(m-1)} - \theta^*\|^2\right) \\
&\quad \left. + (2K_3 + 2K_4)\beta + 10K_5\beta^2 + 10\left(\rho_{\max} \frac{1+\gamma}{\min |\lambda(C)|}\right)^2 K_1 \left(\alpha^2 + \frac{2\alpha^2}{\lambda_C} \frac{1}{\beta}\right) \right\} + \alpha^2 M \cdot 5\gamma^2 \rho_{\max}^2 \mathbb{E}_{m,0} \|\tilde{z}^{(m-1)}\|^2.
\end{aligned}$$

688 Re-arranging the above inequality yields that

$$\begin{aligned}
&\left\{ \frac{\lambda_{\hat{A}}}{12} \alpha - \frac{\alpha}{\beta} \cdot \frac{96}{\lambda_{\hat{A}} \lambda_C} \gamma^2 \rho_{\max}^2 \cdot 10(1+\gamma)^2 \rho_{\max}^2 \cdot \left[\left(1 + \frac{\gamma \rho_{\max}}{\min |\lambda(C)|}\right)^2 \left(\alpha^2 + \frac{2\alpha^2}{\lambda_C} \frac{1}{\beta}\right) \cdot \left(\rho_{\max} \frac{1+\gamma}{\min |\lambda(C)|}\right)^2\right.\right. \\
&\quad \left. + \left(1 + \frac{1}{\min |\lambda(C)|}\right)^2 \beta^2\right] \sum_{t=0}^{M-1} \mathbb{E}_{m,0} \|\theta_t^{(m)} - \theta^*\|^2 \\
&\leq \left[1 + \alpha^2 M \cdot 5(1+\gamma)^2 \rho_{\max}^2 \left(1 + \frac{\gamma \rho_{\max}}{\min |\lambda(C)|}\right)^2\right. \\
&\quad + \frac{\alpha M}{\beta} \cdot \frac{96}{\lambda_{\hat{A}} \lambda_C} \gamma^2 \rho_{\max}^2 \cdot 10(1+\gamma)^2 \rho_{\max}^2 \cdot \left[\left(1 + \frac{\gamma \rho_{\max}}{\min |\lambda(C)|}\right)^2 \left(\alpha^2 + \frac{2\alpha^2}{\lambda_C} \frac{1}{\beta}\right) \cdot \left(\rho_{\max} \frac{1+\gamma}{\min |\lambda(C)|}\right)^2\right. \\
&\quad \left. + \left(1 + \frac{1}{\min |\lambda(C)|}\right)^2 \beta^2\right] \mathbb{E}_{m,0} \|\tilde{\theta}^{(m-1)} - \theta^*\|^2 + \alpha \cdot 2K_2 + \alpha^2 \cdot 5K_1 \\
&\quad + \left\{ \frac{\alpha}{\beta} \cdot \frac{96}{\lambda_{\hat{A}} \lambda_C} \gamma^2 \rho_{\max}^2 \left[1 + \left[10\beta^2 + 10\gamma^2 \rho_{\max}^2 \left(\alpha^2 + \frac{2\alpha^2}{\lambda_C} \frac{1}{\beta}\right) \cdot \left(\rho_{\max} \frac{1+\gamma}{\min |\lambda(C)|}\right)^2\right] M\right] \right. \\
&\quad \left. + \alpha^2 M \cdot 5\gamma^2 \rho_{\max}^2 \right\} \mathbb{E}_{m,0} \|\tilde{z}^{(m-1)}\|^2 \\
&\quad + \alpha \cdot \frac{96}{\lambda_{\hat{A}} \lambda_C} \gamma^2 \rho_{\max}^2 (2K_3 + 2K_4) + \alpha \beta \cdot \frac{96}{\lambda_{\hat{A}} \lambda_C} \gamma^2 \rho_{\max}^2 10K_5 \\
&\quad + \frac{\alpha}{\beta} \left(\alpha^2 + \frac{2\alpha^2}{\lambda_C} \frac{1}{\beta}\right) \cdot \frac{96}{\lambda_{\hat{A}} \lambda_C} \gamma^2 \rho_{\max}^2 10 \left(\rho_{\max} \frac{1+\gamma}{\min |\lambda(C)|}\right)^2 K_1. \tag{43}
\end{aligned}$$

689 To simplify the above inequality, note that we assume that  $\frac{\lambda_{\hat{A}}}{12} \alpha - \frac{\alpha}{\beta} \cdot \frac{96}{\lambda_{\hat{A}} \lambda_C} \gamma^2 \rho_{\max}^2 \cdot 10(1+\gamma)^2 \rho_{\max}^2 \cdot$   
690  $\left[\left(1 + \frac{\gamma \rho_{\max}}{\min |\lambda(C)|}\right)^2 \left(\alpha^2 + \frac{2\alpha^2}{\lambda_C} \frac{1}{\beta}\right) \cdot \left(\rho_{\max} \frac{1+\gamma}{\min |\lambda(C)|}\right)^2 + \left(1 + \frac{1}{\min |\lambda(C)|}\right)^2 \beta^2\right] \geq \frac{\lambda_{\hat{A}}}{16} \alpha$  and  $\beta \leq 1$ .

691 Applying Jensen's inequality to the left-hand side of the above inequality, we obtain the following  
 692 simplified inequality.

$$\begin{aligned}
& \frac{\lambda_{\hat{A}}}{16} \alpha M \mathbb{E}_{m,0} \|\tilde{\theta}^{(m)} - \theta^*\|^2 \\
& \leq \left[ 1 + \alpha^2 M \cdot 5(1 + \gamma)^2 \rho_{\max}^2 \left( 1 + \frac{\gamma \rho_{\max}}{\min |\lambda(C)|} \right)^2 \right. \\
& \quad + \alpha M \left[ \left( 1 + \frac{\gamma \rho_{\max}}{\min |\lambda(C)|} \right)^2 \left( 1 + \frac{2}{\lambda_C} \right) \cdot \left( \rho_{\max} \frac{1 + \gamma}{\min |\lambda(C)|} \right)^2 \frac{\alpha^2}{\beta^2} \right. \\
& \quad + \left. \left( 1 + \frac{1}{\min |\lambda(C)|} \right)^2 \beta \right] \cdot \frac{96}{\lambda_{\hat{A}} \lambda_C} \gamma^2 \rho_{\max}^2 \cdot 10(1 + \gamma)^2 \rho_{\max}^2 \mathbb{E}_{m,0} \|\tilde{\theta}^{(m-1)} - \theta^*\|^2 \\
& \quad + \left\{ \frac{\alpha}{\beta} \cdot \frac{96}{\lambda_{\hat{A}} \lambda_C} \gamma^2 \rho_{\max}^2 \left[ 1 + \left[ 10\beta^2 + 10\gamma^2 \rho_{\max}^2 \left( 1 + \frac{2}{\lambda_C} \right) \cdot \left( \rho_{\max} \frac{1 + \gamma}{\min |\lambda(C)|} \right)^2 \frac{\alpha^2}{\beta^2} \right] M \right] \right. \\
& \quad + \left. \alpha^2 M \cdot 5\gamma^2 \rho_{\max}^2 \right\} \mathbb{E}_{m,0} \|\tilde{z}^{(m-1)}\|^2 \\
& \quad + \alpha \cdot \left[ \frac{96}{\lambda_{\hat{A}} \lambda_C} \gamma^2 \rho_{\max}^2 (2K_3 + 2K_4) + 2K_2 \right] + \alpha \beta \cdot \frac{96}{\lambda_{\hat{A}} \lambda_C} \gamma^2 \rho_{\max}^2 10K_5 \\
& \quad + \frac{\alpha^3}{\beta} \left( 1 + \frac{2}{\lambda_C} \right) \cdot \frac{96}{\lambda_{\hat{A}} \lambda_C} \gamma^2 \rho_{\max}^2 10 \left( \rho_{\max} \frac{1 + \gamma}{\min |\lambda(C)|} \right)^2 K_1 + \alpha^2 \cdot 5K_1.
\end{aligned}$$

693 Define  $C_1 = \left( 1 + \frac{\gamma \rho_{\max}}{\min |\lambda(C)|} \right)^2 \left( 1 + \frac{2}{\lambda_C} \right) \cdot \left( \rho_{\max} \frac{1 + \gamma}{\min |\lambda(C)|} \right)^2 \cdot \frac{96}{\lambda_{\hat{A}} \lambda_C} \gamma^2 \rho_{\max}^2 \cdot 10(1 + \gamma)^2 \rho_{\max}^2$  and

694  $C_2 = \left( 1 + \frac{1}{\min |\lambda(C)|} \right)^2 \cdot \frac{96}{\lambda_{\hat{A}} \lambda_C} \gamma^2 \rho_{\max}^2 \cdot 10(1 + \gamma)^2 \rho_{\max}^2$ , and assume that

$$D := \frac{16}{\lambda_{\hat{A}}} \left[ \frac{1}{\alpha M} + \alpha \cdot 5(1 + \gamma)^2 \rho_{\max}^2 \left( 1 + \frac{\gamma \rho_{\max}}{\min |\lambda(C)|} \right)^2 + \frac{\alpha^2}{\beta^2} \cdot C_1 + \beta \cdot C_2 \right] < 1. \quad (44)$$

695 Taking total expectation and dividing  $\frac{\lambda_{\hat{A}}}{16} \alpha M$  on both sides of the previous simplified inequality, we  
 696 obtain that

$$\begin{aligned}
& \mathbb{E} \|\tilde{\theta}^{(m)} - \theta^*\|^2 \\
& \leq D \cdot \mathbb{E}_{m,0} \|\tilde{\theta}^{(m-1)} - \theta^*\|^2 \\
& \quad + \frac{16}{\lambda_{\hat{A}}} \left\{ \frac{96}{\lambda_{\hat{A}} \lambda_C} \gamma^2 \rho_{\max}^2 \left[ \frac{1}{\beta M} + 10\beta + 10\gamma^2 \rho_{\max}^2 \left( 1 + \frac{2}{\lambda_C} \right) \cdot \left( \rho_{\max} \frac{1 + \gamma}{\min |\lambda(C)|} \right)^2 \frac{\alpha^2}{\beta^2} \right] + \alpha \cdot 5\gamma^2 \rho_{\max}^2 \right\} \mathbb{E} \|\tilde{z}^{(m-1)}\|^2 \\
& \quad + \frac{1}{M} \cdot \frac{16}{\lambda_{\hat{A}}} \left[ \frac{96}{\lambda_{\hat{A}} \lambda_C} \gamma^2 \rho_{\max}^2 (2K_3 + 2K_4) + 2K_2 \right] + \frac{\beta}{M} \cdot \frac{16}{\lambda_{\hat{A}}} \frac{96}{\lambda_{\hat{A}} \lambda_C} \gamma^2 \rho_{\max}^2 10K_5 \\
& \quad + \frac{\alpha^2}{\beta M} \cdot \frac{16}{\lambda_{\hat{A}}} \left( 1 + \frac{2}{\lambda_C} \right) \cdot \frac{96}{\lambda_{\hat{A}} \lambda_C} \gamma^2 \rho_{\max}^2 10 \left( \rho_{\max} \frac{1 + \gamma}{\min |\lambda(C)|} \right)^2 K_1 + \frac{\alpha}{M} \cdot \frac{80K_1}{\lambda_{\hat{A}}}. \quad (45)
\end{aligned}$$

697 By Lemma H.2, we have that

$$\begin{aligned}
\mathbb{E} \|\tilde{z}^{(m)}\|^2 & \leq \left( \frac{1}{M\beta} \cdot \frac{12}{\lambda_C} \right)^m \mathbb{E} \|\tilde{z}^{(0)}\|^2 \\
& \quad + 2 \cdot \left[ \beta \cdot \frac{24}{\lambda_C} H_{\text{VR}}^2 + \frac{\alpha^2}{\beta^2} \cdot \left( 1 + \frac{2}{\lambda_C} \right) \cdot \frac{24}{\lambda_C} \left( \rho_{\max} \frac{1 + \gamma}{\min |\lambda(C)|} \right)^2 G_{\text{VR}}^2 + \frac{1}{M} \frac{24}{\lambda_C} (K_3 + K_4) \right],
\end{aligned}$$

698 where  $K_3$  is specified in eq. (71) of Lemma I.3, and  $K_4$  is specified in eq. (75) of Lemma I.4. Here  
 699 we assume that

$$E := \frac{1}{M\beta} \cdot \frac{12}{\lambda_C} < 1. \quad (46)$$

700 Substituting the above result of Lemma H.2 into eq.(45), we obtain that

$$\begin{aligned}
& \mathbb{E} \|\tilde{\theta}^{(m)} - \theta^*\|^2 \\
& \leq D \cdot \mathbb{E} \|\tilde{\theta}^{(m-1)} - \theta^*\|^2
\end{aligned}$$

$$\begin{aligned}
& + \frac{16}{\lambda_{\hat{A}}} \left\{ \frac{96}{\lambda_{\hat{A}} \lambda_C} \gamma^2 \rho_{\max}^2 \left[ \frac{1}{\beta M} + 10\beta + 10\gamma^2 \rho_{\max}^2 \left( 1 + \frac{2}{\lambda_C} \right) \cdot \left( \rho_{\max} \frac{1+\gamma}{\min |\lambda(C)|} \right)^2 \frac{\alpha^2}{\beta^2} \right] + \alpha \cdot 5\gamma^2 \rho_{\max}^2 \right\} \left\{ E^{m-1} \mathbb{E} \|\tilde{z}^{(0)}\|^2 \right. \\
& + 2 \cdot \left[ \beta \cdot \frac{24}{\lambda_C} H_{\text{VR}}^2 + \frac{\alpha^2}{\beta^2} \cdot \left( 1 + \frac{2}{\lambda_C} \right) \cdot \frac{24}{\lambda_C} \left( \rho_{\max} \frac{1+\gamma}{\min |\lambda(C)|} \right)^2 G_{\text{VR}}^2 + \frac{1}{M} \frac{24}{\lambda_C} (K_3 + K_4) \right] \Big\} \\
& + \frac{1}{M} \cdot \frac{16}{\lambda_{\hat{A}}} \left[ \frac{96}{\lambda_{\hat{A}} \lambda_C} \gamma^2 \rho_{\max}^2 (2K_3 + 2K_4) + 2K_2 \right] + \frac{\beta}{M} \cdot \frac{16}{\lambda_{\hat{A}}} \frac{96}{\lambda_{\hat{A}} \lambda_C} \gamma^2 \rho_{\max}^2 10K_5 \\
& + \frac{\alpha^2}{\beta M} \cdot \frac{16}{\lambda_{\hat{A}}} \left( 1 + \frac{2}{\lambda_C} \right) \cdot \frac{96}{\lambda_{\hat{A}} \lambda_C} \gamma^2 \rho_{\max}^2 10 \left( \rho_{\max} \frac{1+\gamma}{\min |\lambda(C)|} \right)^2 K_1 + \frac{\alpha}{M} \cdot \frac{80K_1}{\lambda_{\hat{A}}}.
\end{aligned}$$

701 Furthermore, we assume that  $\frac{16}{\lambda_{\hat{A}}} \left\{ \frac{96}{\lambda_{\hat{A}} \lambda_C} \gamma^2 \rho_{\max}^2 \left[ \frac{1}{\beta M} + 10\beta + 10\gamma^2 \rho_{\max}^2 \left( 1 + \frac{2}{\lambda_C} \right) \cdot \left( \rho_{\max} \frac{1+\gamma}{\min |\lambda(C)|} \right)^2 \frac{\alpha^2}{\beta^2} \right] + \alpha \cdot 5\gamma^2 \rho_{\max}^2 \right\} \leq 1$ .

702 Then, telescope the above inequality yields that

$$\begin{aligned}
& \mathbb{E} \|\tilde{\theta}^{(m)} - \theta^*\|^2 \\
& \leq D^m \cdot \mathbb{E} \|\tilde{\theta}^{(0)} - \theta^*\|^2 + \frac{D^m - E^m}{D - E} \mathbb{E} \|\tilde{z}^{(0)}\|^2 \\
& + \frac{32}{\lambda_{\hat{A}}} \left\{ \frac{96}{\lambda_{\hat{A}} \lambda_C} \gamma^2 \rho_{\max}^2 \left[ \frac{1}{\beta M} + 10\beta + 10\gamma^2 \rho_{\max}^2 \left( 1 + \frac{2}{\lambda_C} \right) \cdot \left( \rho_{\max} \frac{1+\gamma}{\min |\lambda(C)|} \right)^2 \frac{\alpha^2}{\beta^2} \right] \right. \\
& + \alpha \cdot 5\gamma^2 \rho_{\max}^2 \Big\} \left\{ \beta \cdot \frac{24}{\lambda_C} H_{\text{VR}}^2 + \frac{\alpha^2}{\beta^2} \cdot \left( 1 + \frac{2}{\lambda_C} \right) \cdot \frac{24}{\lambda_C} \left( \rho_{\max} \frac{1+\gamma}{\min |\lambda(C)|} \right)^2 G_{\text{VR}}^2 + \frac{1}{M} \frac{24}{\lambda_C} (K_3 + K_4) \right\} \\
& + \frac{1}{M} \cdot \frac{16}{\lambda_{\hat{A}}} \left[ \frac{96}{\lambda_{\hat{A}} \lambda_C} \gamma^2 \rho_{\max}^2 (2K_3 + 2K_4) + 2K_2 \right] + \frac{\beta}{M} \cdot \frac{16}{\lambda_{\hat{A}}} \frac{96}{\lambda_{\hat{A}} \lambda_C} \gamma^2 \rho_{\max}^2 10K_5 \\
& + \frac{\alpha^2}{\beta M} \cdot \frac{16}{\lambda_{\hat{A}}} \left( 1 + \frac{2}{\lambda_C} \right) \cdot \frac{96}{\lambda_{\hat{A}} \lambda_C} \gamma^2 \rho_{\max}^2 10 \left( \rho_{\max} \frac{1+\gamma}{\min |\lambda(C)|} \right)^2 K_1 + \frac{\alpha}{M} \cdot \frac{80K_1}{\lambda_{\hat{A}}}.
\end{aligned}$$

703 To further simplify, note that the first two terms are in the order of  $D^m$ . Also, the third term  
704 is a product of two curly brackets, and it is easy to check that this term is dominated by  $\mathcal{O}(\beta^2)$   
705 under the relation  $\beta = \mathcal{O}(\alpha^{2/3})$ . To further elaborate this, note that the first bracket of this  
706 product is in the order of  $\mathcal{O}(\frac{1}{\beta M}) + \mathcal{O}(\beta)$  and the second term of this product is in the order of  
707  $\mathcal{O}(\beta)$  (by  $E < 1$ , we have  $\frac{1}{M} \leq \mathcal{O}(\beta)$ ). Therefore, asymptotically the product is in the order of  
708  $(\mathcal{O}(\frac{1}{\beta M}) + \mathcal{O}(\beta)) \times \mathcal{O}(\beta) = \mathcal{O}(\frac{1}{M}) + \mathcal{O}(\beta^2)$ . Moreover, under the setting  $\beta = \mathcal{O}(\alpha^{2/3})$ ,  $D > E$   
709 for sufficiently small  $\alpha$  and  $\beta$ . Therefore, we have the following asymptotic bound

$$\mathbb{E} \|\tilde{\theta}^{(m)} - \theta^*\|^2 = \mathcal{O}(D^m) + \mathcal{O}(\beta^2) + \mathcal{O}\left(\frac{1}{M}\right).$$

710 Now we compute its complexity. For sufficiently small  $\beta$  and sufficiently large  $M$ , there always  
711 exists constant  $I_1, I_2, I_3$  such that

$$\mathbb{E} \|\tilde{\theta}^{(m)} - \theta^*\|^2 \leq D^m I_1 + \beta^2 I_2 + \frac{1}{M} I_3.$$

712 Now we require

- 713 (i)  $\beta^2 I_2 \leq \epsilon/3 \Rightarrow \beta \leq I_2^{1/2} \epsilon^{1/2} = \mathcal{O}(\epsilon^{1/2})$ .
- 714 (ii)  $\frac{1}{M} I_3 \leq \epsilon/3 \Rightarrow M \geq \mathcal{O}(\epsilon^{-1})$ .
- 715 (iii)  $D^m I_1 \leq \epsilon/3 \Rightarrow m \log D \leq \log \frac{\epsilon}{3I_1} \Rightarrow m \geq \mathcal{O}(\log \epsilon^{-1})$ .

716 Note that in (iii), we have used the condition that  $D < 1$  and hence  $\log D$  is a negative constant.  
717 Since  $\alpha = \mathcal{O}(\beta^{2/3})$ , the condition that  $D \leq 1$  requires that  $M \geq \mathcal{O}(\beta^{-3/2})$ , which combines with  
718 (ii) requires that

$$M \geq \max\{\mathcal{O}(\epsilon^{-1}), \mathcal{O}(\beta^{-3/2})\}.$$

719 Taking into account the constraint on  $\beta$  in (i), we just require that  $M \geq \mathcal{O}(\epsilon^{-1})$ , which leads to the  
720 overall complexity result

$$mM \geq \mathcal{O}(\epsilon^{-1} \log \epsilon^{-1}).$$

721 **G Proof of Corollary 4.2**

722 **Lemma G.1** (Refined Bounds of  $\mathbb{E}\|\tilde{z}\|^2$ ). *Under the same assumptions as those of Theorem 4.1,*  
 723 *choose the learning rate  $\alpha, \beta$  and the batch size  $M$  such that all requirements of Theorem 4.1 are*  
 724 *satisfied. Then, the following refined bound holds.*

$$\begin{aligned}
 & \mathbb{E}\|\tilde{z}^{(m)}\|^2 \\
 & \leq F^m \cdot \mathbb{E}\|\tilde{z}^{(0)}\|^2 + \frac{D^{m-1} - F^{m-1}}{D - F} \cdot \mathbb{E}\|\tilde{\theta}^{(0)} - \theta^*\|^2 + \frac{\frac{D^{m-1} - F^{m-1}}{D - F} - \frac{E^{m-1} - F^{m-1}}{E - F}}{D - E} \mathbb{E}\|\tilde{z}^{(0)}\|^2 \\
 & \quad + \frac{1}{1 - F} \frac{24}{\lambda_C} \left\{ 10(1 + \gamma)^2 \rho_{\max}^2 \cdot \left[ \left(1 + \frac{\gamma \rho_{\max}}{\min |\lambda(C)|}\right)^2 \left(1 + \frac{2}{\lambda_C}\right) \cdot \left(\rho_{\max} \frac{1 + \gamma}{\min |\lambda(C)|}\right)^2 \frac{\alpha^2}{\beta^2} \right. \right. \\
 & \quad + \left. \left(1 + \frac{1}{\min |\lambda(C)|}\right)^2 \beta \right] + 120(1 + \gamma)^2 \rho_{\max}^2 \frac{1}{\lambda_{\hat{A}}} \cdot \left[ \left(1 + \frac{\gamma \rho_{\max}}{\min |\lambda(C)|}\right)^2 \left(1 + \frac{2}{\lambda_C}\right) \cdot \left(\rho_{\max} \frac{1 + \gamma}{\min |\lambda(C)|}\right)^2 \frac{\alpha^2}{\beta^2} \right. \right. \\
 & \quad + \left. \left(1 + \frac{1}{\min |\lambda(C)|}\right)^2 \beta \right] \cdot \left[ \frac{1}{\alpha M} + \alpha \cdot 5(1 + \gamma)^2 \rho_{\max}^2 \left(1 + \frac{\gamma \rho_{\max}}{\min |\lambda(C)|}\right)^2 \right] \left. \right\} \\
 & \quad \times \left\{ \frac{32}{\lambda_{\hat{A}}} \left\{ \frac{96}{\lambda_{\hat{A}} \lambda_C} \gamma^2 \rho_{\max}^2 \left[ \frac{1}{\beta M} + 10\beta + 10\gamma^2 \rho_{\max}^2 \left(1 + \frac{2}{\lambda_C}\right) \cdot \left(\rho_{\max} \frac{1 + \gamma}{\min |\lambda(C)|}\right)^2 \frac{\alpha^2}{\beta^2} \right] + \alpha \cdot 5\gamma^2 \rho_{\max}^2 \right\} \right. \\
 & \quad \times \left\{ \beta \cdot \frac{24}{\lambda_C} H_{VR}^2 + \frac{\alpha^2}{\beta^2} \cdot \left(1 + \frac{2}{\lambda_C}\right) \cdot \frac{24}{\lambda_C} \left(\rho_{\max} \frac{1 + \gamma}{\min |\lambda(C)|}\right)^2 G_{VR}^2 + \frac{1}{M} \frac{24}{\lambda_C} (K_3 + K_4) \right\} \\
 & \quad + \frac{1}{M} \cdot \frac{16}{\lambda_{\hat{A}}} \left[ \frac{96}{\lambda_{\hat{A}} \lambda_C} \gamma^2 \rho_{\max}^2 (2K_3 + 2K_4) + 2K_2 \right] + \frac{\beta}{M} \cdot \frac{16}{\lambda_{\hat{A}}} \frac{96}{\lambda_{\hat{A}} \lambda_C} \gamma^2 \rho_{\max}^2 10K_5 \\
 & \quad + \frac{\alpha^2}{\beta M} \cdot \frac{16}{\lambda_{\hat{A}}} \left(1 + \frac{2}{\lambda_C}\right) \cdot \frac{96}{\lambda_{\hat{A}} \lambda_C} \gamma^2 \rho_{\max}^2 10 \left(\rho_{\max} \frac{1 + \gamma}{\min |\lambda(C)|}\right)^2 K_1 + \frac{\alpha}{M} \cdot \frac{80K_1}{\lambda_{\hat{A}}} \left. \right\} \\
 & \quad + \frac{1}{1 - F} \left\{ \frac{1}{M} \frac{48K_3 + 48K_4}{\lambda_C} + \frac{\beta}{M} \frac{240K_5}{\lambda_C} + \frac{\alpha^2}{\beta^2} \frac{1}{M} \frac{240}{\lambda_C} \left(\rho_{\max} \frac{1 + \gamma}{\min |\lambda(C)|}\right)^2 K_1 \left(1 + \frac{2}{\lambda_C}\right) \right. \\
 & \quad + \frac{1}{M} (1 + \gamma)^2 \rho_{\max}^2 \frac{2880}{\lambda_{\hat{A}} \lambda_C} \cdot \left[ \left(1 + \frac{\gamma \rho_{\max}}{\min |\lambda(C)|}\right)^2 \left(1 + \frac{2}{\lambda_C}\right) \cdot \left(\rho_{\max} \frac{1 + \gamma}{\min |\lambda(C)|}\right)^2 \frac{\alpha^2}{\beta^2} \right. \\
 & \quad + \left. \left(1 + \frac{1}{\min |\lambda(C)|}\right)^2 \beta \right] \cdot \left. \left\{ 2K_2 + \alpha \cdot 5K_1 \right\} \right\}.
 \end{aligned}$$

725 *Proof.* Based on the preliminary bound of  $\sum_{t=0}^{M-1} \mathbb{E}_{m,0} \|z_t^{(m)}\|^2$  (Lemma H.3), we have

$$\begin{aligned}
 & \frac{\lambda_C}{16} \beta \sum_{t=0}^{M-1} \mathbb{E}_{m,0} \|z_t^{(m)}\|^2 \\
 & \leq \left[ 1 + \left[ 10\beta^2 + 10\gamma^2 \rho_{\max}^2 \left( \alpha^2 + \frac{2\alpha^2}{\lambda_C} \frac{1}{\beta} \right) \cdot \left( \rho_{\max} \frac{1 + \gamma}{\min |\lambda(C)|} \right)^2 \right] M \right] \mathbb{E}_{m,0} \|\tilde{z}^{(m-1)}\|^2 \\
 & \quad + 10(1 + \gamma)^2 \rho_{\max}^2 \cdot \left[ \left(1 + \frac{\gamma \rho_{\max}}{\min |\lambda(C)|}\right)^2 \left( \alpha^2 + \frac{2\alpha^2}{\lambda_C} \frac{1}{\beta} \right) \cdot \left( \rho_{\max} \frac{1 + \gamma}{\min |\lambda(C)|} \right)^2 \right. \\
 & \quad + \left. \left(1 + \frac{1}{\min |\lambda(C)|}\right)^2 \beta^2 \right] \left( \sum_{t=0}^{M-1} \mathbb{E}_{m,0} \|\theta_t^{(m)} - \theta^*\|^2 + M \mathbb{E}_{m,0} \|\tilde{\theta}^{(m-1)} - \theta^*\|^2 \right) \\
 & \quad + (2K_3 + 2K_4)\beta + 10K_5\beta^2 + 10 \left( \rho_{\max} \frac{1 + \gamma}{\min |\lambda(C)|} \right)^2 K_1 \left( \alpha^2 + \frac{2\alpha^2}{\lambda_C} \frac{1}{\beta} \right), \tag{47}
 \end{aligned}$$

726 where  $K_1$  is specified in eq. (63) of Lemma I.1,  $K_3$  is specified in eq. (71) of Lemma I.3,  $K_4$  is  
 727 specified in eq. (75) of Lemma I.4, and  $K_5$  is specified in eq. (76) of Lemma I.5. Note that by Lemma  
 728 H.1, we have the preliminary bound of  $\sum_{t=0}^{M-1} \mathbb{E}_{m,0} \|\theta_t^{(m)} - \theta^*\|^2$ :

$$\frac{\lambda_{\hat{A}}}{12} \alpha \sum_{t=0}^{M-1} \mathbb{E}_{m,0} \|\theta_t^{(m)} - \theta^*\|^2$$

$$\begin{aligned}
&\leq \left[1 + \alpha^2 M \cdot 5(1 + \gamma)^2 \rho_{\max}^2 \left(1 + \frac{\gamma \rho_{\max}}{\min |\lambda(C)|}\right)^2\right] \mathbb{E}_{m,0} \|\tilde{\theta}^{(m-1)} - \theta^*\|^2 + \alpha \cdot 2K_2 + \alpha^2 \cdot 5K_1 \\
&\quad + \alpha \cdot \frac{6}{\lambda_{\hat{A}}} \gamma^2 \rho_{\max}^2 \sum_{t=0}^{M-1} \mathbb{E}_{m,0} \|z_t^{(m)}\|^2 + \alpha^2 M \cdot 5\gamma^2 \rho_{\max}^2 \mathbb{E}_{m,0} \|\tilde{z}^{(m-1)}\|^2, \tag{48}
\end{aligned}$$

729 where  $K_1$  is specified in eq. (63) of Lemma I.1, and  $K_2$  is specified in eq. (67) of Lemma I.2. Now  
730 we combine eq.(47) and eq.(48) to obtain that

$$\begin{aligned}
&\frac{\lambda_C}{16} \beta \sum_{t=0}^{M-1} \mathbb{E}_{m,0} \|z_t^{(m)}\|^2 \\
&\leq \left[1 + \left[10\beta^2 + 10\gamma^2 \rho_{\max}^2 \left(\alpha^2 + \frac{2\alpha^2}{\lambda_C} \frac{1}{\beta}\right) \cdot \left(\rho_{\max} \frac{1+\gamma}{\min |\lambda(C)|}\right)^2\right] M\right] \mathbb{E}_{m,0} \|\tilde{z}^{(m-1)}\|^2 \\
&\quad + \frac{1}{\alpha} \cdot 120(1 + \gamma)^2 \rho_{\max}^2 \frac{1}{\lambda_{\hat{A}}} \cdot \left[\left(1 + \frac{\gamma \rho_{\max}}{\min |\lambda(C)|}\right)^2 \left(\alpha^2 + \frac{2\alpha^2}{\lambda_C} \frac{1}{\beta}\right) \cdot \left(\rho_{\max} \frac{1+\gamma}{\min |\lambda(C)|}\right)^2\right. \\
&\quad \left.+ \left(1 + \frac{1}{\min |\lambda(C)|}\right)^2 \beta^2\right] \cdot \left\{\left[1 + \alpha^2 M \cdot 5(1 + \gamma)^2 \rho_{\max}^2 \left(1 + \frac{\gamma \rho_{\max}}{\min |\lambda(C)|}\right)^2\right] \mathbb{E}_{m,0} \|\tilde{\theta}^{(m-1)} - \theta^*\|^2\right. \\
&\quad \left.+ \alpha \cdot 2K_2 + \alpha^2 \cdot 5K_1 + \alpha \cdot \frac{6}{\lambda_{\hat{A}}} \gamma^2 \rho_{\max}^2 \sum_{t=0}^{M-1} \mathbb{E}_{m,0} \|z_t^{(m)}\|^2 + \alpha^2 M \cdot 5\gamma^2 \rho_{\max}^2 \mathbb{E}_{m,0} \|\tilde{z}^{(m-1)}\|^2\right\} \\
&\quad + 10(1 + \gamma)^2 \rho_{\max}^2 \cdot \left[\left(1 + \frac{\gamma \rho_{\max}}{\min |\lambda(C)|}\right)^2 \left(\alpha^2 + \frac{2\alpha^2}{\lambda_C} \frac{1}{\beta}\right) \cdot \left(\rho_{\max} \frac{1+\gamma}{\min |\lambda(C)|}\right)^2\right. \\
&\quad \left.+ \left(1 + \frac{1}{\min |\lambda(C)|}\right)^2 \beta^2\right] \cdot M \mathbb{E}_{m,0} \|\tilde{\theta}^{(m-1)} - \theta^*\|^2 \\
&\quad + (2K_3 + 2K_4)\beta + 10K_5\beta^2 + 10\left(\rho_{\max} \frac{1+\gamma}{\min |\lambda(C)|}\right)^2 K_1 \left(\alpha^2 + \frac{2\alpha^2}{\lambda_C} \frac{1}{\beta}\right).
\end{aligned}$$

731 Next, we simplify the above inequality. We first expand the curly brackets and simplify, we obtain  
732 that

$$\begin{aligned}
&\left\{\frac{\lambda_C}{16} \beta - 120(1 + \gamma)^2 \rho_{\max}^2 \frac{1}{\lambda_{\hat{A}}} \cdot \left[\left(1 + \frac{\gamma \rho_{\max}}{\min |\lambda(C)|}\right)^2 \left(\alpha^2 + \frac{2\alpha^2}{\lambda_C} \frac{1}{\beta}\right) \cdot \left(\rho_{\max} \frac{1+\gamma}{\min |\lambda(C)|}\right)^2\right.\right. \\
&\quad \left.\left.+ \left(1 + \frac{1}{\min |\lambda(C)|}\right)^2 \beta^2\right] \cdot \frac{6}{\lambda_{\hat{A}}} \gamma^2 \rho_{\max}^2\right\} \sum_{t=0}^{M-1} \mathbb{E}_{m,0} \|z_t^{(m)}\|^2 \\
&\leq \left[1 + \left[10\beta^2 + 10\gamma^2 \rho_{\max}^2 \left(\alpha^2 + \frac{2\alpha^2}{\lambda_C} \frac{1}{\beta}\right) \cdot \left(\rho_{\max} \frac{1+\gamma}{\min |\lambda(C)|}\right)^2\right] M\right. \\
&\quad + 120(1 + \gamma)^2 \rho_{\max}^2 \frac{1}{\lambda_{\hat{A}}} \cdot \left[\left(1 + \frac{\gamma \rho_{\max}}{\min |\lambda(C)|}\right)^2 \left(\alpha^2 + \frac{2\alpha^2}{\lambda_C} \frac{1}{\beta}\right) \cdot \left(\rho_{\max} \frac{1+\gamma}{\min |\lambda(C)|}\right)^2\right. \\
&\quad \left.+ \left(1 + \frac{1}{\min |\lambda(C)|}\right)^2 \beta^2\right] \cdot \alpha M \cdot 5\gamma^2 \rho_{\max}^2] \mathbb{E}_{m,0} \|\tilde{z}^{(m-1)}\|^2 \\
&\quad + 120(1 + \gamma)^2 \rho_{\max}^2 \frac{1}{\lambda_{\hat{A}}} \cdot \left[\left(1 + \frac{\gamma \rho_{\max}}{\min |\lambda(C)|}\right)^2 \left(\alpha^2 + \frac{2\alpha^2}{\lambda_C} \frac{1}{\beta}\right) \cdot \left(\rho_{\max} \frac{1+\gamma}{\min |\lambda(C)|}\right)^2 + \left(1 + \frac{1}{\min |\lambda(C)|}\right)^2 \beta^2\right] \\
&\quad \times \left[2K_2 + \alpha \cdot 5K_1\right] \\
&\quad + \left\{10(1 + \gamma)^2 \rho_{\max}^2 \cdot \left[\left(1 + \frac{\gamma \rho_{\max}}{\min |\lambda(C)|}\right)^2 \left(\alpha^2 + \frac{2\alpha^2}{\lambda_C} \frac{1}{\beta}\right) \cdot \left(\rho_{\max} \frac{1+\gamma}{\min |\lambda(C)|}\right)^2\right.\right. \\
&\quad \left.+ \left(1 + \frac{1}{\min |\lambda(C)|}\right)^2 \beta^2\right] \cdot M + \frac{1}{\alpha} \cdot 120(1 + \gamma)^2 \rho_{\max}^2 \frac{1}{\lambda_{\hat{A}}} \cdot \left[\left(1 + \frac{\gamma \rho_{\max}}{\min |\lambda(C)|}\right)^2 \left(\alpha^2 + \frac{2\alpha^2}{\lambda_C} \frac{1}{\beta}\right) \cdot \left(\rho_{\max} \frac{1+\gamma}{\min |\lambda(C)|}\right)^2\right. \\
&\quad \left.+ \left(1 + \frac{1}{\min |\lambda(C)|}\right)^2 \beta^2\right] \cdot \left[1 + \alpha^2 M \cdot 5(1 + \gamma)^2 \rho_{\max}^2 \left(1 + \frac{\gamma \rho_{\max}}{\min |\lambda(C)|}\right)^2\right]\} \mathbb{E}_{m,0} \|\tilde{\theta}^{(m-1)} - \theta^*\|^2 \\
&\quad + (2K_3 + 2K_4)\beta + 10K_5\beta^2 + 10\left(\rho_{\max} \frac{1+\gamma}{\min |\lambda(C)|}\right)^2 K_1 \left(\alpha^2 + \frac{2\alpha^2}{\lambda_C} \frac{1}{\beta}\right)
\end{aligned}$$

733 Assume  $\frac{\lambda_C}{16}\beta - 120(1+\gamma)^2\rho_{\max}^2\frac{1}{\lambda_{\hat{A}}} \cdot \left[\left(1 + \frac{\gamma\rho_{\max}}{\min|\lambda(C)|}\right)^2\left(\alpha^2 + \frac{2\alpha^2}{\lambda_C}\frac{1}{\beta}\right) \cdot \left(\rho_{\max}\frac{1+\gamma}{\min|\lambda(C)|}\right)^2 + \left(1 + \frac{1}{\min|\lambda(C)|}\right)^2\beta^2\right] \cdot \frac{6}{\lambda_{\hat{A}}}\gamma^2\rho_{\max}^2 \geq \frac{\lambda_C}{24}\beta$  and define

$$F := \frac{24}{\lambda_C} \cdot \left[ \frac{1}{\beta M} + 10\beta + 10\gamma^2\rho_{\max}^2\left(1 + \frac{1}{\lambda_C}\right) \cdot \left(\rho_{\max}\frac{1+\gamma}{\min|\lambda(C)|}\right)^2\frac{\alpha^2}{\beta^2} + \alpha \cdot 120(1+\gamma)^2\rho_{\max}^2\frac{1}{\lambda_{\hat{A}}} \cdot \left[\left(1 + \frac{\gamma\rho_{\max}}{\min|\lambda(C)|}\right)^2\left(1 + \frac{2}{\lambda_C}\right) \cdot \left(\rho_{\max}\frac{1+\gamma}{\min|\lambda(C)|}\right)^2\frac{\alpha^2}{\beta^2} + \left(1 + \frac{1}{\min|\lambda(C)|}\right)^2\beta\right] \cdot 5\gamma^2\rho_{\max}^2 \right]. \quad (49)$$

735 Also, assume that  $F < 1$ . Applying Jensen's inequality on the left-hand side of the above inequality  
736 and dividing  $\frac{\lambda_C}{24}\beta M$  on both sides, we obtain that

$$\begin{aligned} & \mathbb{E}_{m,0}\|\tilde{z}^{(m)}\|^2 \\ & \leq F \cdot \mathbb{E}_{m,0}\|\tilde{z}^{(m-1)}\|^2 \\ & \quad + (1+\gamma)^2\rho_{\max}^2\frac{2880}{\lambda_{\hat{A}}\lambda_C} \cdot \left[\left(1 + \frac{\gamma\rho_{\max}}{\min|\lambda(C)|}\right)^2\left(1 + \frac{2}{\lambda_C}\right) \cdot \left(\rho_{\max}\frac{1+\gamma}{\min|\lambda(C)|}\right)^2\frac{\alpha^2}{\beta^2} + \left(1 + \frac{1}{\min|\lambda(C)|}\right)^2\beta\right] \\ & \quad \times \left[2K_2 + \alpha \cdot 5K_1\right]\frac{1}{M} \\ & \quad + \frac{24}{\lambda_C} \left\{ 10(1+\gamma)^2\rho_{\max}^2 \cdot \left[\left(1 + \frac{\gamma\rho_{\max}}{\min|\lambda(C)|}\right)^2\left(1 + \frac{2}{\lambda_C}\right) \cdot \left(\rho_{\max}\frac{1+\gamma}{\min|\lambda(C)|}\right)^2\frac{\alpha^2}{\beta^2} + \left(1 + \frac{1}{\min|\lambda(C)|}\right)^2\beta\right] + 120(1+\gamma)^2\rho_{\max}^2\frac{1}{\lambda_{\hat{A}}} \cdot \left[\left(1 + \frac{\gamma\rho_{\max}}{\min|\lambda(C)|}\right)^2\left(1 + \frac{2}{\lambda_C}\right) \cdot \left(\rho_{\max}\frac{1+\gamma}{\min|\lambda(C)|}\right)^2\frac{\alpha^2}{\beta^2} + \left(1 + \frac{1}{\min|\lambda(C)|}\right)^2\beta\right] \cdot \left[\frac{1}{\alpha M} + \alpha \cdot 5(1+\gamma)^2\rho_{\max}^2\left(1 + \frac{\gamma\rho_{\max}}{\min|\lambda(C)|}\right)^2\right] \right\} \mathbb{E}_{m,0}\|\tilde{\theta}^{(m-1)} - \theta^*\|^2 \\ & \quad + \frac{1}{M} \frac{48K_3 + 48K_4}{\lambda_C} + \frac{\beta}{M} \frac{240K_5}{\lambda_C} + \frac{\alpha^2}{\beta^2} \frac{1}{M} \frac{240}{\lambda_C} \left(\rho_{\max}\frac{1+\gamma}{\min|\lambda(C)|}\right)^2 K_1 \left(1 + \frac{2}{\lambda_C}\right), \quad (50) \end{aligned}$$

737 where we also use the fact that  $\beta \leq 1$ . Recall that we have obtain the final bound of  $\mathbb{E}\|\tilde{\theta}^{(m-1)} - \theta^*\|^2$   
738 in Theorem 4.1 as follows:

$$\begin{aligned} & \mathbb{E}\|\tilde{\theta}^{(m)} - \theta^*\|^2 \\ & \leq D^m \cdot \mathbb{E}\|\tilde{\theta}^{(0)} - \theta^*\|^2 + \frac{D^m - E^m}{D - E} \mathbb{E}\|\tilde{z}^{(0)}\|^2 \\ & \quad + \frac{32}{\lambda_{\hat{A}}} \left\{ \frac{96}{\lambda_{\hat{A}}\lambda_C} \gamma^2 \rho_{\max}^2 \left[ \frac{1}{\beta M} + 10\beta + 10\gamma^2\rho_{\max}^2\left(1 + \frac{2}{\lambda_C}\right) \cdot \left(\rho_{\max}\frac{1+\gamma}{\min|\lambda(C)|}\right)^2\frac{\alpha^2}{\beta^2} \right] + \alpha \cdot 5\gamma^2\rho_{\max}^2 \right\} \\ & \quad \times \left\{ \beta \cdot \frac{24}{\lambda_C} H_{\text{VR}}^2 + \frac{\alpha^2}{\beta^2} \cdot \left(1 + \frac{2}{\lambda_C}\right) \cdot \frac{24}{\lambda_C} \left(\rho_{\max}\frac{1+\gamma}{\min|\lambda(C)|}\right)^2 G_{\text{VR}}^2 + \frac{1}{M} \frac{24}{\lambda_C} (K_3 + K_4) \right\} \\ & \quad + \frac{1}{M} \cdot \frac{16}{\lambda_{\hat{A}}} \left[ \frac{96}{\lambda_{\hat{A}}\lambda_C} \gamma^2 \rho_{\max}^2 (2K_3 + 2K_4) + 2K_2 \right] + \frac{\beta}{M} \cdot \frac{16}{\lambda_{\hat{A}}} \frac{96}{\lambda_{\hat{A}}\lambda_C} \gamma^2 \rho_{\max}^2 10K_5 \\ & \quad + \frac{\alpha^2}{\beta M} \cdot \frac{16}{\lambda_{\hat{A}}} \left(1 + \frac{2}{\lambda_C}\right) \cdot \frac{96}{\lambda_{\hat{A}}\lambda_C} \gamma^2 \rho_{\max}^2 10 \left(\rho_{\max}\frac{1+\gamma}{\min|\lambda(C)|}\right)^2 K_1 + \frac{\alpha}{M} \cdot \frac{80K_1}{\lambda_{\hat{A}}}. \quad (51) \end{aligned}$$

739 Taking total expectation on both sides of eq.(50) and applying eq.(51), we obtain that

$$\begin{aligned} & \mathbb{E}\|\tilde{z}^{(m)}\|^2 \\ & \leq F \cdot \mathbb{E}\|\tilde{z}^{(m-1)}\|^2 \\ & \quad + (1+\gamma)^2\rho_{\max}^2\frac{2880}{\lambda_{\hat{A}}\lambda_C} \cdot \left[\left(1 + \frac{\gamma\rho_{\max}}{\min|\lambda(C)|}\right)^2\left(1 + \frac{2}{\lambda_C}\right) \cdot \left(\rho_{\max}\frac{1+\gamma}{\min|\lambda(C)|}\right)^2\frac{\alpha^2}{\beta^2} + \left(1 + \frac{1}{\min|\lambda(C)|}\right)^2\beta\right] \end{aligned}$$

$$\begin{aligned}
& \times \left\{ 2K_2 + \alpha \cdot 5K_1 \right\} \frac{1}{M} \\
& + \frac{24}{\lambda_C} \left\{ 10(1+\gamma)^2 \rho_{\max}^2 \cdot \left[ \left( 1 + \frac{\gamma \rho_{\max}}{\min |\lambda(C)|} \right)^2 \left( 1 + \frac{2}{\lambda_C} \right) \cdot \left( \rho_{\max} \frac{1+\gamma}{\min |\lambda(C)|} \right)^2 \frac{\alpha^2}{\beta^2} \right. \right. \\
& + \left. \left( 1 + \frac{1}{\min |\lambda(C)|} \right)^2 \beta \right] + 120(1+\gamma)^2 \rho_{\max}^2 \frac{1}{\lambda_{\hat{A}}} \cdot \left[ \left( 1 + \frac{\gamma \rho_{\max}}{\min |\lambda(C)|} \right)^2 \left( 1 + \frac{2}{\lambda_C} \right) \cdot \left( \rho_{\max} \frac{1+\gamma}{\min |\lambda(C)|} \right)^2 \frac{\alpha^2}{\beta^2} \right. \\
& + \left. \left( 1 + \frac{1}{\min |\lambda(C)|} \right)^2 \beta \right] \cdot \left[ \frac{1}{\alpha M} + \alpha \cdot 5(1+\gamma)^2 \rho_{\max}^2 \left( 1 + \frac{\gamma \rho_{\max}}{\min |\lambda(C)|} \right)^2 \right] \left. \right\} \\
& \times \left\{ D^{m-1} \cdot \mathbb{E} \|\tilde{\theta}^{(0)} - \theta^*\|^2 + \frac{D^{m-1} - E^{m-1}}{D - E} \mathbb{E} \|\tilde{z}^{(0)}\|^2 \right. \\
& + \left. \frac{32}{\lambda_{\hat{A}}} \left\{ \frac{96}{\lambda_{\hat{A}} \lambda_C} \gamma^2 \rho_{\max}^2 \left[ \frac{1}{\beta M} + 10\beta + 10\gamma^2 \rho_{\max}^2 \left( 1 + \frac{2}{\lambda_C} \right) \cdot \left( \rho_{\max} \frac{1+\gamma}{\min |\lambda(C)|} \right)^2 \frac{\alpha^2}{\beta^2} \right] + \alpha \cdot 5\gamma^2 \rho_{\max}^2 \right\} \right. \\
& \times \left\{ \beta \cdot \frac{24}{\lambda_C} H_{\text{VR}}^2 + \frac{\alpha^2}{\beta^2} \cdot \left( 1 + \frac{2}{\lambda_C} \right) \cdot \frac{24}{\lambda_C} \left( \rho_{\max} \frac{1+\gamma}{\min |\lambda(C)|} \right)^2 G_{\text{VR}}^2 + \frac{1}{M} \frac{24}{\lambda_C} (K_3 + K_4) \right\} \\
& + \frac{1}{M} \cdot \frac{16}{\lambda_{\hat{A}}} \left[ \frac{96}{\lambda_{\hat{A}} \lambda_C} \gamma^2 \rho_{\max}^2 (2K_3 + 2K_4) + 2K_2 \right] + \frac{\beta}{M} \cdot \frac{16}{\lambda_{\hat{A}}} \frac{96}{\lambda_{\hat{A}} \lambda_C} \gamma^2 \rho_{\max}^2 10K_5 \\
& + \frac{\alpha^2}{\beta M} \cdot \frac{16}{\lambda_{\hat{A}}} \left( 1 + \frac{2}{\lambda_C} \right) \cdot \frac{96}{\lambda_{\hat{A}} \lambda_C} \gamma^2 \rho_{\max}^2 10 \left( \rho_{\max} \frac{1+\gamma}{\min |\lambda(C)|} \right)^2 K_1 + \frac{\alpha}{M} \cdot \frac{80K_1}{\lambda_{\hat{A}}} \left. \right\} \\
& + \frac{1}{M} \frac{48K_3 + 48K_4}{\lambda_C} + \frac{\beta}{M} \frac{240K_5}{\lambda_C} + \frac{\alpha^2}{\beta^2} \frac{1}{M} \frac{240}{\lambda_C} \left( \rho_{\max} \frac{1+\gamma}{\min |\lambda(C)|} \right)^2 K_1 \left( 1 + \frac{2}{\lambda_C} \right) \\
& \leq F \cdot \mathbb{E} \|\tilde{z}^{(m-1)}\|^2 + D^{m-1} \cdot \mathbb{E} \|\tilde{\theta}^{(0)} - \theta^*\|^2 + \frac{D^{m-1} - E^{m-1}}{D - E} \mathbb{E} \|\tilde{z}^{(0)}\|^2 \\
& + (1+\gamma)^2 \rho_{\max}^2 \frac{2880}{\lambda_{\hat{A}} \lambda_C} \cdot \left[ \left( 1 + \frac{\gamma \rho_{\max}}{\min |\lambda(C)|} \right)^2 \left( 1 + \frac{2}{\lambda_C} \right) \cdot \left( \rho_{\max} \frac{1+\gamma}{\min |\lambda(C)|} \right)^2 \frac{\alpha^2}{\beta^2} + \left( 1 + \frac{1}{\min |\lambda(C)|} \right)^2 \beta \right] \\
& \times \left\{ 2K_2 + \alpha \cdot 5K_1 \right\} \frac{1}{M} \\
& + \frac{24}{\lambda_C} \left\{ 10(1+\gamma)^2 \rho_{\max}^2 \cdot \left[ \left( 1 + \frac{\gamma \rho_{\max}}{\min |\lambda(C)|} \right)^2 \left( 1 + \frac{2}{\lambda_C} \right) \cdot \left( \rho_{\max} \frac{1+\gamma}{\min |\lambda(C)|} \right)^2 \frac{\alpha^2}{\beta^2} \right. \right. \\
& + \left. \left( 1 + \frac{1}{\min |\lambda(C)|} \right)^2 \beta \right] + 120(1+\gamma)^2 \rho_{\max}^2 \frac{1}{\lambda_{\hat{A}}} \cdot \left[ \left( 1 + \frac{\gamma \rho_{\max}}{\min |\lambda(C)|} \right)^2 \left( 1 + \frac{2}{\lambda_C} \right) \cdot \left( \rho_{\max} \frac{1+\gamma}{\min |\lambda(C)|} \right)^2 \frac{\alpha^2}{\beta^2} \right. \\
& + \left. \left( 1 + \frac{1}{\min |\lambda(C)|} \right)^2 \beta \right] \cdot \left[ \frac{1}{\alpha M} + \alpha \cdot 5(1+\gamma)^2 \rho_{\max}^2 \left( 1 + \frac{\gamma \rho_{\max}}{\min |\lambda(C)|} \right)^2 \right] \left. \right\} \\
& \times \left\{ \frac{32}{\lambda_{\hat{A}}} \left\{ \frac{96}{\lambda_{\hat{A}} \lambda_C} \gamma^2 \rho_{\max}^2 \left[ \frac{1}{\beta M} + 10\beta + 10\gamma^2 \rho_{\max}^2 \left( 1 + \frac{2}{\lambda_C} \right) \cdot \left( \rho_{\max} \frac{1+\gamma}{\min |\lambda(C)|} \right)^2 \frac{\alpha^2}{\beta^2} \right] + \alpha \cdot 5\gamma^2 \rho_{\max}^2 \right\} \right. \\
& \times \left\{ \beta \cdot \frac{24}{\lambda_C} H_{\text{VR}}^2 + \frac{\alpha^2}{\beta^2} \cdot \left( 1 + \frac{2}{\lambda_C} \right) \cdot \frac{24}{\lambda_C} \left( \rho_{\max} \frac{1+\gamma}{\min |\lambda(C)|} \right)^2 G_{\text{VR}}^2 + \frac{1}{M} \frac{24}{\lambda_C} (K_3 + K_4) \right\} \\
& + \frac{1}{M} \cdot \frac{16}{\lambda_{\hat{A}}} \left[ \frac{96}{\lambda_{\hat{A}} \lambda_C} \gamma^2 \rho_{\max}^2 (2K_3 + 2K_4) + 2K_2 \right] + \frac{\beta}{M} \cdot \frac{16}{\lambda_{\hat{A}}} \frac{96}{\lambda_{\hat{A}} \lambda_C} \gamma^2 \rho_{\max}^2 10K_5 \\
& + \frac{\alpha^2}{\beta M} \cdot \frac{16}{\lambda_{\hat{A}}} \left( 1 + \frac{2}{\lambda_C} \right) \cdot \frac{96}{\lambda_{\hat{A}} \lambda_C} \gamma^2 \rho_{\max}^2 10 \left( \rho_{\max} \frac{1+\gamma}{\min |\lambda(C)|} \right)^2 K_1 + \frac{\alpha}{M} \cdot \frac{80K_1}{\lambda_{\hat{A}}} \left. \right\} \\
& + \frac{1}{M} \frac{48K_3 + 48K_4}{\lambda_C} + \frac{\beta}{M} \frac{240K_5}{\lambda_C} + \frac{\alpha^2}{\beta^2} \frac{1}{M} \frac{240}{\lambda_C} \left( \rho_{\max} \frac{1+\gamma}{\min |\lambda(C)|} \right)^2 K_1 \left( 1 + \frac{2}{\lambda_C} \right)
\end{aligned}$$

740 where in the second step we assume  $\frac{24}{\lambda_C} \left\{ 10(1+\gamma)^2 \rho_{\max}^2 \cdot \left[ \left( 1 + \frac{\gamma \rho_{\max}}{\min |\lambda(C)|} \right)^2 \left( 1 + \frac{2}{\lambda_C} \right) \cdot \right. \right.$   
741  $\left. \left( \rho_{\max} \frac{1+\gamma}{\min |\lambda(C)|} \right)^2 \frac{\alpha^2}{\beta^2} + \left( 1 + \frac{1}{\min |\lambda(C)|} \right)^2 \beta \right] + 120(1+\gamma)^2 \rho_{\max}^2 \frac{1}{\lambda_{\hat{A}}} \cdot \left[ \left( 1 + \frac{\gamma \rho_{\max}}{\min |\lambda(C)|} \right)^2 \left( 1 + \frac{2}{\lambda_C} \right) \cdot \right.$   
742  $\left. \left( \rho_{\max} \frac{1+\gamma}{\min |\lambda(C)|} \right)^2 \frac{\alpha^2}{\beta^2} + \left( 1 + \frac{1}{\min |\lambda(C)|} \right)^2 \beta \right] \cdot \left[ \frac{1}{\alpha M} + \alpha \cdot 5(1+\gamma)^2 \rho_{\max}^2 \left( 1 + \frac{\gamma \rho_{\max}}{\min |\lambda(C)|} \right)^2 \right] \left. \right\} \leq 1.$

743 Lastly, we telescope the above inequality and obtain that

$$\begin{aligned}
& \mathbb{E}\|\tilde{z}^{(m)}\|^2 \\
& \leq F^m \cdot \mathbb{E}\|\tilde{z}^{(0)}\|^2 + \frac{D^{m-1} - F^{m-1}}{D - F} \cdot \mathbb{E}\|\tilde{\theta}^{(0)} - \theta^*\|^2 + \frac{\frac{D^{m-1} - F^{m-1}}{D - F} - \frac{E^{m-1} - F^{m-1}}{E - F}}{D - E} \mathbb{E}\|\tilde{z}^{(0)}\|^2 \\
& \quad + \frac{1}{1 - F} \frac{24}{\lambda_C} \left\{ 10(1 + \gamma)^2 \rho_{\max}^2 \cdot \left[ \left(1 + \frac{\gamma \rho_{\max}}{\min |\lambda(C)|}\right)^2 \left(1 + \frac{2}{\lambda_C}\right) \cdot \left(\rho_{\max} \frac{1 + \gamma}{\min |\lambda(C)|}\right)^2 \frac{\alpha^2}{\beta^2} \right. \right. \\
& \quad + \left. \left(1 + \frac{1}{\min |\lambda(C)|}\right)^2 \beta \right] + 120(1 + \gamma)^2 \rho_{\max}^2 \frac{1}{\lambda_{\hat{A}}} \cdot \left[ \left(1 + \frac{\gamma \rho_{\max}}{\min |\lambda(C)|}\right)^2 \left(1 + \frac{2}{\lambda_C}\right) \cdot \left(\rho_{\max} \frac{1 + \gamma}{\min |\lambda(C)|}\right)^2 \frac{\alpha^2}{\beta^2} \right. \right. \\
& \quad + \left. \left(1 + \frac{1}{\min |\lambda(C)|}\right)^2 \beta \right] \cdot \left[ \frac{1}{\alpha M} + \alpha \cdot 5(1 + \gamma)^2 \rho_{\max}^2 \left(1 + \frac{\gamma \rho_{\max}}{\min |\lambda(C)|}\right)^2 \right] \Big\} \\
& \quad \times \left\{ \frac{32}{\lambda_{\hat{A}}} \left\{ \frac{96}{\lambda_{\hat{A}} \lambda_C} \gamma^2 \rho_{\max}^2 \left[ \frac{1}{\beta M} + 10\beta + 10\gamma^2 \rho_{\max}^2 \left(1 + \frac{2}{\lambda_C}\right) \cdot \left(\rho_{\max} \frac{1 + \gamma}{\min |\lambda(C)|}\right)^2 \frac{\alpha^2}{\beta^2} \right] + \alpha \cdot 5\gamma^2 \rho_{\max}^2 \right\} \right. \\
& \quad \times \left\{ \beta \cdot \frac{24}{\lambda_C} H_{\text{VR}}^2 + \frac{\alpha^2}{\beta^2} \cdot \left(1 + \frac{2}{\lambda_C}\right) \cdot \frac{24}{\lambda_C} \left(\rho_{\max} \frac{1 + \gamma}{\min |\lambda(C)|}\right)^2 G_{\text{VR}}^2 + \frac{1}{M} \frac{24}{\lambda_C} (K_3 + K_4) \right\} \\
& \quad + \frac{1}{M} \cdot \frac{16}{\lambda_{\hat{A}}} \left[ \frac{96}{\lambda_{\hat{A}} \lambda_C} \gamma^2 \rho_{\max}^2 (2K_3 + 2K_4) + 2K_2 \right] + \frac{\beta}{M} \cdot \frac{16}{\lambda_{\hat{A}}} \frac{96}{\lambda_{\hat{A}} \lambda_C} \gamma^2 \rho_{\max}^2 10K_5 \\
& \quad + \frac{\alpha^2}{\beta M} \cdot \frac{16}{\lambda_{\hat{A}}} \left(1 + \frac{2}{\lambda_C}\right) \cdot \frac{96}{\lambda_{\hat{A}} \lambda_C} \gamma^2 \rho_{\max}^2 10 \left(\rho_{\max} \frac{1 + \gamma}{\min |\lambda(C)|}\right)^2 K_1 + \frac{\alpha}{M} \cdot \frac{80K_1}{\lambda_{\hat{A}}} \Big\} \\
& \quad + \frac{1}{M} \frac{48K_3 + 48K_4}{\lambda_C} + \frac{\beta}{M} \frac{240K_5}{\lambda_C} + \frac{\alpha^2}{\beta^2} \frac{1}{M} \frac{240}{\lambda_C} \left(\rho_{\max} \frac{1 + \gamma}{\min |\lambda(C)|}\right)^2 K_1 \left(1 + \frac{2}{\lambda_C}\right) \\
& \quad + \frac{1}{1 - F} \left\{ \frac{1}{M} (1 + \gamma)^2 \rho_{\max}^2 \frac{2880}{\lambda_{\hat{A}} \lambda_C} \cdot \left[ \left(1 + \frac{\gamma \rho_{\max}}{\min |\lambda(C)|}\right)^2 \left(1 + \frac{2}{\lambda_C}\right) \cdot \left(\rho_{\max} \frac{1 + \gamma}{\min |\lambda(C)|}\right)^2 \frac{\alpha^2}{\beta^2} + \left(1 + \frac{1}{\min |\lambda(C)|}\right)^2 \beta \right] \right\}.
\end{aligned}$$

744 To further simplify, note that the first three terms in the right hand side of the above inequality  
745 are in the order of  $D^m$  ( $D > E, D > F$ ). For the fourth term, it is easy to check that under  
746 the relation  $\beta = \mathcal{O}(\alpha^{2/3})$ , it is in the order of  $\mathcal{O}(\beta^3) + \mathcal{O}(\frac{\beta}{M})$ . The other terms are dominated  
747 by  $\frac{1}{M}$ . Therefore, the asymptotic error is in the order of  $\mathcal{O}(\beta^3) + \mathcal{O}(\frac{1}{M})$ . To further elaborate  
748 this, note that the fourth term is a product of three curly brackets. The first bracket is in the order  
749 of  $\mathcal{O}(\beta) + \mathcal{O}(\beta) \times (\mathcal{O}(\frac{1}{\alpha M}) + \mathcal{O}(\alpha)) = \mathcal{O}(\beta) + \mathcal{O}(\frac{\beta}{\alpha M})$ , the second one is in the order of  
750  $\mathcal{O}(\frac{1}{\beta M}) + \mathcal{O}(\beta)$  and the last one is in the order of  $\mathcal{O}(\beta)$ . Hence their product is in the order of  
751  $(\mathcal{O}(\beta) + \mathcal{O}(\frac{\beta}{\alpha M})) \times (\mathcal{O}(\frac{1}{\beta M}) + \mathcal{O}(\beta)) \times \mathcal{O}(\beta) = \mathcal{O}(\frac{\beta}{M}) + \mathcal{O}(\frac{\beta}{\alpha M^2}) + \mathcal{O}(\beta^3) + \mathcal{O}(\frac{\beta^3}{\alpha M}) =$   
752  $\mathcal{O}(\frac{\beta}{M}) + \mathcal{O}(\frac{\beta}{\alpha M^2}) + \mathcal{O}(\beta^3)$ . In summary, we have the following asymptotic result:

$$\mathbb{E}\|\tilde{z}^{(m)}\|^2 \leq \mathcal{O}(D^m) + \mathcal{O}(\beta^3) + \mathcal{O}(\frac{1}{M}).$$

753 By following the same proof logic of Theorem 3.1 and Theorem 4.1, the sample complexity under  
754 the optimal setting is  $\mathcal{O}(\epsilon^{-1} \log \epsilon^{-1})$ .

755

□

## 756 H Key Lemmas for Proving Theorem 4.1

757 **Lemma H.1** (Preliminary Bound for  $\sum_{t=0}^{M-1} \|\theta_t^{(m)} - \theta^*\|^2$ ). *Under the same assumptions as those*  
758 *of Theorem 3.1, choose the learning rate  $\alpha$  such that*

$$\alpha \leq \min \left\{ \frac{\lambda_{\hat{A}}}{30} / \left[ (1 + \gamma)^2 \rho_{\max}^2 \left(1 + \frac{\gamma \rho_{\max}}{\min |\lambda(C)|}\right)^2 \right], \frac{3}{5} \frac{1}{\lambda_{\hat{A}}} \right\}. \quad (52)$$

759 Then, the following preliminary bound holds,

$$\frac{\lambda_{\hat{A}}}{12} \alpha \sum_{t=0}^{M-1} \mathbb{E}_{m,0} \|\theta_t^{(m)} - \theta^*\|^2$$



$$\leq \left[1 + \alpha^2 M \cdot 5(1 + \gamma)^2 \rho_{\max}^2 \left(1 + \frac{\gamma \rho_{\max}}{\min |\lambda(C)|}\right)^2\right] \mathbb{E}_{m,0} \|\tilde{\theta}^{(m-1)} - \theta^*\|^2 + \alpha \cdot 2K_2 + \alpha^2 \cdot 5K_1$$

$$+ \alpha \cdot \frac{6}{\lambda_{\hat{A}}} \gamma^2 \rho_{\max}^2 \sum_{t=0}^{M-1} \mathbb{E}_{m,0} \|z_t^{(m)}\|^2 + \alpha^2 M \cdot 5\gamma^2 \rho_{\max}^2 \mathbb{E}_{m,0} \|\tilde{z}^{(m-1)}\|^2,$$

where  $K_1$  is specified in eq. (63) of Lemma I.1, and  $K_2$  is specified in eq. (67) of Lemma I.2.

*Proof.* Based on the update rule of VRTDC for Markovian samples, we have that

$$\theta_{t+1}^{(m)} = \Pi_{R_\theta} \left[ \theta_t^{(m)} + \alpha [G_t^{(m)}(\theta_t^{(m)}, z_t^{(m)}) - G_t^{(m)}(\tilde{\theta}^{(m-1)}, \tilde{z}^{(m-1)}) + G^{(m)}(\tilde{\theta}^{(m-1)}, \tilde{z}^{(m-1)})] \right].$$

The above update rule further implies that

$$\begin{aligned} \|\theta_{t+1}^{(m)} - \theta^*\|^2 &\stackrel{(i)}{\leq} \|\theta_t^{(m)} - \theta^* + \alpha [G_t^{(m)}(\theta_t^{(m)}, z_t^{(m)}) - G_t^{(m)}(\tilde{\theta}^{(m-1)}, \tilde{z}^{(m-1)}) + G^{(m)}(\tilde{\theta}^{(m-1)}, \tilde{z}^{(m-1)})]\|^2 \\ &= \|\theta_t^{(m)} - \theta^*\|^2 + \alpha^2 \|G_t^{(m)}(\theta_t^{(m)}, z_t^{(m)}) - G_t^{(m)}(\tilde{\theta}^{(m-1)}, \tilde{z}^{(m-1)}) + G^{(m)}(\tilde{\theta}^{(m-1)}, \tilde{z}^{(m-1)})\|^2 \\ &\quad + 2\alpha \langle \theta_t^{(m)} - \theta^*, G_t^{(m)}(\theta_t^{(m)}, z_t^{(m)}) - G_t^{(m)}(\tilde{\theta}^{(m-1)}, \tilde{z}^{(m-1)}) + G^{(m)}(\tilde{\theta}^{(m-1)}, \tilde{z}^{(m-1)}) \rangle, \end{aligned} \quad (53)$$

where (i) uses the assumption that  $R_\theta \geq \|\theta^*\|$  (i.e.,  $\theta^*$  is in the ball with radius  $R_\theta$ ) and the fact that  $\Pi_{R_\theta}$  is 1-Lipschitz. Then we take  $\mathbb{E}_{m,0}$  on both sides. An upper bound for the second term of eq. (53) is given in Lemma I.6. Next, we consider the third term of eq. (53) and obtain that

$$\begin{aligned} &\mathbb{E}_{m,0} \langle \theta_t^{(m)} - \theta^*, G_t^{(m)}(\theta_t^{(m)}, z_t^{(m)}) - G_t^{(m)}(\tilde{\theta}^{(m-1)}, \tilde{z}^{(m-1)}) + G^{(m)}(\tilde{\theta}^{(m-1)}, \tilde{z}^{(m-1)}) \rangle \\ &= \mathbb{E}_{m,0} \langle \theta_t^{(m)} - \theta^*, G^{(m)}(\theta_t^{(m)}, z_t^{(m)}) \rangle \\ &= \mathbb{E}_{m,0} \langle \theta_t^{(m)} - \theta^*, \hat{A}^{(m)} \theta_t^{(m)} + \hat{b}^{(m)} + \hat{B}^{(m)} z_t^{(m)} \rangle \\ &= \mathbb{E}_{m,0} \langle \theta_t^{(m)} - \theta^*, \hat{A}^{(m)} \theta_t^{(m)} - \hat{A} \theta_t^{(m)} + \hat{A} \theta_t^{(m)} + \hat{b}^{(m)} - \hat{b} + \hat{b} \rangle + \mathbb{E}_{m,0} \langle \theta_t^{(m)} - \theta^*, \hat{B}^{(m)} z_t^{(m)} \rangle \\ &= \mathbb{E}_{m,0} \langle \theta_t^{(m)} - \theta^*, (\hat{A}^{(m)} - \hat{A}) \theta_t^{(m)} + (\hat{b}^{(m)} - \hat{b}) \rangle + \mathbb{E}_{m,0} \langle \theta_t^{(m)} - \theta^*, \hat{A} \theta_t^{(m)} - \hat{A} \theta^* + \hat{A} \theta^* + \hat{b} \rangle \\ &\quad + \mathbb{E}_{m,0} \langle \theta_t^{(m)} - \theta^*, \hat{B}^{(m)} z_t^{(m)} \rangle \\ &= \mathbb{E}_{m,0} \langle \theta_t^{(m)} - \theta^*, (\hat{A}^{(m)} - \hat{A}) \theta_t^{(m)} + (\hat{b}^{(m)} - \hat{b}) \rangle + \mathbb{E}_{m,0} \langle \theta_t^{(m)} - \theta^*, \hat{A}(\theta_t^{(m)} - \theta^*) \rangle \\ &\quad + \mathbb{E}_{m,0} \langle \theta_t^{(m)} - \theta^*, \hat{B}^{(m)} z_t^{(m)} \rangle \end{aligned} \quad (54)$$

The first term of eq. (54) is bounded by Lemma I.2. The second term of eq. (54) can be bounded by using the property of negative definite matrix:  $\lambda_{\max}(\hat{A}) \|\theta - \theta^*\|^2 \geq (\theta - \theta^*)^T \hat{A} (\theta - \theta^*) \geq \lambda_{\min}(\hat{A}) \|\theta - \theta^*\|^2$ . Recall that  $-\lambda_{\hat{A}} := \lambda_{\max}(\hat{A} + \hat{A}^T)$ , and we obtain that

$$\mathbb{E}_{m,0} \langle \theta_t^{(m)} - \theta^*, \hat{A}(\theta_t^{(m)} - \theta^*) \rangle \leq -\frac{\lambda_{\hat{A}}}{2} \mathbb{E}_{m,0} \|\theta_t^{(m)} - \theta^*\|^2.$$

The third term of eq. (54) is bounded using the polarization identity,

$$\mathbb{E}_{m,0} \langle \theta_t^{(m)} - \theta^*, \hat{B}^{(m)} z_t^{(m)} \rangle \leq \frac{1}{2} \cdot \frac{\lambda_{\hat{A}}}{3} \mathbb{E}_{m,0} \|\theta_t^{(m)} - \theta^*\|^2 + \frac{1}{2} \cdot \frac{3}{\lambda_{\hat{A}}} \gamma^2 \rho_{\max}^2 \mathbb{E}_{m,0} \|z_t^{(m)}\|^2.$$

Substituting the above bounds into the third term of eq. (53), we obtain that

$$\begin{aligned} &\mathbb{E}_{m,0} \langle \theta_t^{(m)} - \theta^*, G_t^{(m)}(\theta_t^{(m)}, z_t^{(m)}) - G_t^{(m)}(\tilde{\theta}^{(m-1)}, \tilde{z}^{(m-1)}) + G^{(m)}(\tilde{\theta}^{(m-1)}, \tilde{z}^{(m-1)}) \rangle \\ &\leq -\frac{\lambda_{\hat{A}}}{12} \mathbb{E}_{m,0} \|\theta_t^{(m)} - \theta^*\|^2 + \frac{K_2}{M} + \frac{1}{2} \cdot \frac{3}{\lambda_{\hat{A}}} \gamma^2 \rho_{\max}^2 \mathbb{E}_{m,0} \|z_t^{(m)}\|^2. \end{aligned} \quad (55)$$

Then, substituting eq. (55) into eq. (53) and re-arranging, we obtain that

$$\begin{aligned} &\mathbb{E}_{m,0} \|\theta_{t+1}^{(m)} - \theta^*\|^2 \\ &\leq \mathbb{E}_{m,0} \|\theta_t^{(m)} - \theta^*\|^2 + \alpha \left[ -\frac{\lambda_{\hat{A}}}{6} \mathbb{E}_{m,0} \|\theta_t^{(m)} - \theta^*\|^2 + \frac{2K_2}{M} + \frac{3}{\lambda_{\hat{A}}} \gamma^2 \rho_{\max}^2 \mathbb{E}_{m,0} \|z_t^{(m)}\|^2 \right] \end{aligned}$$

$$\begin{aligned}
& + \alpha^2 \left[ 5(1+\gamma)^2 \rho_{\max}^2 \left( 1 + \frac{\gamma \rho_{\max}}{\min |\lambda(C)|} \right)^2 \left( \mathbb{E}_{m,0} \|\theta_t^{(m)} - \theta^*\|^2 + \mathbb{E}_{m,0} \|\tilde{\theta}^{(m-1)} - \theta^*\|^2 \right) \right] \\
& + \alpha^2 \left[ 5\gamma^2 \rho_{\max}^2 \left( \mathbb{E}_{m,0} \|z_t^{(m)}\|^2 + \mathbb{E}_{m,0} \|\tilde{z}^{(m-1)}\|^2 \right) + \frac{5K_1}{M} \right] \\
& = \mathbb{E}_{m,0} \|\theta_t^{(m)} - \theta^*\|^2 - \left( \frac{\lambda_{\hat{A}}}{6} \alpha - \alpha^2 \cdot 5(1+\gamma)^2 \rho_{\max}^2 \left( 1 + \frac{\gamma \rho_{\max}}{\min |\lambda(C)|} \right)^2 \right) \mathbb{E}_{m,0} \|\theta_t^{(m)} - \theta^*\|^2 \\
& + \alpha^2 \cdot 5(1+\gamma)^2 \rho_{\max}^2 \left( 1 + \frac{\gamma \rho_{\max}}{\min |\lambda(C)|} \right)^2 \mathbb{E}_{m,0} \|\tilde{\theta}^{(m-1)} - \theta^*\|^2 + \frac{\alpha}{M} \cdot 2K_2 + \frac{\alpha^2}{M} \cdot 5K_1 \\
& + \left( \alpha \cdot \frac{3}{\lambda_{\hat{A}}} \gamma^2 \rho_{\max}^2 + \alpha^2 \cdot 5\gamma^2 \rho_{\max}^2 \right) \mathbb{E}_{m,0} \|z_t^{(m)}\|^2 + \alpha^2 \cdot 5\gamma^2 \rho_{\max}^2 \mathbb{E}_{m,0} \|\tilde{z}^{(m-1)}\|^2.
\end{aligned}$$

769 Summing the above inequality over  $t = 0, \dots, M-1$ , we obtain the following desired bound

$$\begin{aligned}
& \left( \frac{\lambda_{\hat{A}}}{6} \alpha - \alpha^2 \cdot 5(1+\gamma)^2 \rho_{\max}^2 \left( 1 + \frac{\gamma \rho_{\max}}{\min |\lambda(C)|} \right)^2 \right) \sum_{t=0}^{M-1} \mathbb{E}_{m,0} \|\theta_t^{(m)} - \theta^*\|^2 \\
& \leq \left[ 1 + \alpha^2 M \cdot 5(1+\gamma)^2 \rho_{\max}^2 \left( 1 + \frac{\gamma \rho_{\max}}{\min |\lambda(C)|} \right)^2 \right] \mathbb{E}_{m,0} \|\tilde{\theta}^{(m-1)} - \theta^*\|^2 + \alpha \cdot 2K_2 + \alpha^2 \cdot 5K_1 \\
& + \left( \alpha \cdot \frac{3}{\lambda_{\hat{A}}} \gamma^2 \rho_{\max}^2 + \alpha^2 \cdot 5\gamma^2 \rho_{\max}^2 \right) \sum_{t=0}^{M-1} \mathbb{E}_{m,0} \|z_t^{(m)}\|^2 + \alpha^2 M \cdot 5\gamma^2 \rho_{\max}^2 \mathbb{E}_{m,0} \|\tilde{z}^{(m-1)}\|^2.
\end{aligned} \tag{56}$$

770 Lastly, we simplify the above bound by choosing sufficiently small  $\alpha$  such that  $\frac{\lambda_{\hat{A}}}{6} \alpha - \alpha^2 \cdot 5(1+\gamma)^2 \rho_{\max}^2 \left( 1 + \frac{\gamma \rho_{\max}}{\min |\lambda(C)|} \right)^2 \geq \frac{\lambda_{\hat{A}}}{12} \alpha$ , and  $\alpha^2 \cdot 5\gamma^2 \rho_{\max}^2 \leq \alpha \cdot \frac{3}{\lambda_{\hat{A}}} \gamma^2 \rho_{\max}^2$ . Note that these requirements  
771 can be implied by  
772

$$\alpha \leq \min \left\{ \frac{\lambda_{\hat{A}}}{30} / \left[ (1+\gamma)^2 \rho_{\max}^2 \left( 1 + \frac{\gamma \rho_{\max}}{\min |\lambda(C)|} \right)^2 \right], \frac{3}{5} \frac{1}{\lambda_{\hat{A}}} \right\}.$$

773 Applying these simplifications, eq. (56) becomes

$$\begin{aligned}
& \frac{\lambda_{\hat{A}}}{12} \alpha \sum_{t=0}^{M-1} \mathbb{E}_{m,0} \|\theta_t^{(m)} - \theta^*\|^2 \\
& \leq \left[ 1 + \alpha^2 M \cdot 5(1+\gamma)^2 \rho_{\max}^2 \left( 1 + \frac{\gamma \rho_{\max}}{\min |\lambda(C)|} \right)^2 \right] \mathbb{E}_{m,0} \|\tilde{\theta}^{(m-1)} - \theta^*\|^2 + \alpha \cdot 2K_2 + \alpha^2 \cdot 5K_1 \\
& + \alpha \cdot \frac{6}{\lambda_{\hat{A}}} \gamma^2 \rho_{\max}^2 \sum_{t=0}^{M-1} \mathbb{E}_{m,0} \|z_t^{(m)}\|^2 + \alpha^2 M \cdot 5\gamma^2 \rho_{\max}^2 \mathbb{E}_{m,0} \|\tilde{z}^{(m-1)}\|^2.
\end{aligned}$$

774

□

775 **Lemma H.2** (Convergence of  $\mathbb{E} \|\tilde{z}^{(m)}\|^2$ ). *Under the same assumptions as those of Theorem 4.1,*  
776 *choose the learning rate  $\beta$  and the batch size  $M$  such that  $\beta < 1$  and  $M\beta > \frac{12}{\lambda_C}$ . Then, the following*  
777 *preliminary bound holds.*

$$\begin{aligned}
\mathbb{E} \|\tilde{z}^{(m)}\|^2 & \leq \left( \frac{1}{M\beta} \cdot \frac{12}{\lambda_C} \right)^m \mathbb{E} \|\tilde{z}^{(0)}\|^2 \\
& + 2 \cdot \left[ \beta \cdot \frac{24}{\lambda_C} H_{VR}^2 + \frac{\alpha^2}{\beta^2} \cdot \left( 1 + \frac{2}{\lambda_C} \right) \cdot \frac{24}{\lambda_C} \left( \rho_{\max} \frac{1+\gamma}{\min |\lambda(C)|} \right)^2 G_{VR}^2 + \frac{1}{M} \frac{24}{\lambda_C} (K_3 + K_4) \right],
\end{aligned}$$

778 where  $K_3$  is specified in eq. (71) of Lemma I.3, and  $K_4$  is specified in eq. (75) of Lemma I.4.

779 *Proof.* Similar to Lemma D.2, we can obtain the one-step update rule of  $z_t^{(m)}$  based on the one-step  
780 update rule of  $w_t^{(m)}$ . Combining this update rule with the assumption that  $R_w \geq 2\|C^{-1}\| \|A\| R_\theta$ ,  
781 we obtain that

$$\|z_{t+1}^{(m)}\|^2 \leq \|z_t^{(m)}\|^2 + \beta \left[ H_t^{(m)}(\theta_t^{(m)}, z_t^{(m)}) - H_t^{(m)}(\tilde{\theta}^{(m-1)}, \tilde{z}^{(m-1)}) + H^{(m)}(\tilde{\theta}^{(m-1)}, \tilde{z}^{(m-1)}) \right]$$

$$\begin{aligned}
& + C^{-1}A(\theta_{t+1}^{(m)} - \theta_t^{(m)})\|^2 \\
& = \|z_t^{(m)}\|^2 + 2\beta^2\|H_t^{(m)}(\theta_t^{(m)}, z_t^{(m)}) - H_t^{(m)}(\tilde{\theta}^{(m-1)}, \tilde{z}^{(m-1)}) + H^{(m)}(\tilde{\theta}^{(m-1)}, \tilde{z}^{(m-1)})\|^2 \\
& \quad + 2\|C^{-1}A(\theta_{t+1}^{(m)} - \theta_t^{(m)})\|^2 \\
& \quad + 2\beta\langle z_t^{(m)}, H_t^{(m)}(\theta_t^{(m)}, z_t^{(m)}) - H_t^{(m)}(\tilde{\theta}^{(m-1)}, \tilde{z}^{(m-1)}) + H^{(m)}(\tilde{\theta}^{(m-1)}, \tilde{z}^{(m-1)}) \rangle \\
& \quad + 2\langle z_t^{(m)}, C^{-1}A(\theta_{t+1}^{(m)} - \theta_t^{(m)}) \rangle
\end{aligned} \tag{57}$$

For the last term of eq. (57), we bound it as

$$2\langle z_t^{(m)}, C^{-1}A(\theta_{t+1}^{(m)} - \theta_t^{(m)}) \rangle \leq \frac{\lambda_C}{2}\beta\|z_t^{(m)}\|^2 + \frac{2}{\lambda_C}\frac{1}{\beta}\|C^{-1}A(\theta_{t+1} - \theta_t)\|^2. \tag{58}$$

Then, we apply Lemma J.4 to bound the last term of eq. (58). Also, we apply Lemma J.5 to bound the second term of eq. (57). Then, we obtain that

$$\begin{aligned}
\|z_{t+1}^{(m)}\|^2 & \leq \|z_t^{(m)}\|^2 + 2\beta^2H_{\text{VR}}^2 + \left(\alpha^2 + \frac{2\alpha^2}{\lambda_C}\frac{1}{\beta}\right) \cdot 2\left(\rho_{\max}\frac{1+\gamma}{\min|\lambda(C)|}\right)^2 G_{\text{VR}}^2 + \frac{\lambda_C}{2}\beta\|z_t^{(m)}\|^2 \\
& \quad + 2\beta\langle z_t^{(m)}, H_t^{(m)}(\theta_t^{(m)}, z_t^{(m)}) - H_t^{(m)}(\tilde{\theta}^{(m-1)}, \tilde{z}^{(m-1)}) + H^{(m)}(\tilde{\theta}^{(m-1)}, \tilde{z}^{(m-1)}) \rangle
\end{aligned} \tag{59}$$

Next, we further bound the last term of eq. (59).

$$\begin{aligned}
& \mathbb{E}_{m,0}\langle z_t^{(m)}, H_t^{(m)}(\theta_t^{(m)}, z_t^{(m)}) - H_t^{(m)}(\tilde{\theta}^{(m-1)}, \tilde{z}^{(m-1)}) + H^{(m)}(\tilde{\theta}^{(m-1)}, \tilde{z}^{(m-1)}) \rangle \\
& = \mathbb{E}_{m,0}\langle z_t^{(m)}, H^{(m)}(\theta_t^{(m)}, z_t^{(m)}) \rangle \\
& = \mathbb{E}_{m,0}\langle z_t^{(m)}, \bar{A}^{(m)}\theta_t^{(m)} + \bar{b}^{(m)} + C^{(m)}z_t^{(m)} \rangle \\
& = \mathbb{E}_{m,0}\langle z_t^{(m)}, \bar{A}^{(m)}\theta_t^{(m)} + \bar{b}^{(m)} \rangle + \mathbb{E}_{m,0}\langle z_t^{(m)}, (C^{(m)} - C)z_t^{(m)} \rangle + \mathbb{E}_{m,0}\langle z_t^{(m)}, Cz_t^{(m)} \rangle.
\end{aligned} \tag{60}$$

Then, we apply Lemma I.3 to bound the first term of eq. (60), apply Lemma I.4 to bound the second term of eq. (60) and apply the negative definiteness of  $C$  to bound the last term of eq. (60). We obtain that

$$\begin{aligned}
& \mathbb{E}_{m,0}\langle z_t^{(m)}, H_t^{(m)}(\theta_t^{(m)}, z_t^{(m)}) - H_t^{(m)}(\tilde{\theta}^{(m-1)}, \tilde{z}^{(m-1)}) + H^{(m)}(\tilde{\theta}^{(m-1)}, \tilde{z}^{(m-1)}) \rangle \\
& \leq \left(\frac{\lambda_C}{8}\mathbb{E}_{m,0}\|z_t^{(m)}\|^2 + \frac{K_3}{M}\right) + \left(\frac{\lambda_C}{12}\mathbb{E}_{m,0}\|z_t^{(m)}\|^2 + \frac{K_4}{M}\right) - \frac{\lambda_C}{2}\mathbb{E}_{m,0}\|z_t^{(m)}\|^2 \\
& = -\frac{7\lambda_C}{24}\mathbb{E}_{m,0}\|z_t^{(m)}\|^2 + \frac{K_3 + K_4}{M}.
\end{aligned} \tag{61}$$

Substituting the above inequality into eq. (59) yields that

$$\begin{aligned}
\mathbb{E}_{m,0}\|z_{t+1}^{(m)}\|^2 & \leq \mathbb{E}_{m,0}\|z_t^{(m)}\|^2 + 2\beta^2H_{\text{VR}}^2 + \left(\alpha^2 + \frac{2\alpha^2}{\lambda_C}\frac{1}{\beta}\right) \cdot 2\left(\rho_{\max}\frac{1+\gamma}{\min|\lambda(C)|}\right)^2 G_{\text{VR}}^2 \\
& \quad - \frac{\lambda_C}{12}\beta\mathbb{E}_{m,0}\|z_t^{(m)}\|^2 + \frac{2K_3 + 2K_4}{M}\beta.
\end{aligned}$$

Telescoping the above inequality over one batch, we further obtain that

$$\begin{aligned}
\mathbb{E}_{m,0}\|z_M^{(m)}\|^2 & \leq \mathbb{E}_{m,0}\|z_0^{(m)}\|^2 + 2\beta^2MH_{\text{VR}}^2 + \left(\alpha^2 + \frac{2\alpha^2}{\lambda_C}\frac{1}{\beta}\right)M \cdot 2\left(\rho_{\max}\frac{1+\gamma}{\min|\lambda(C)|}\right)^2 G_{\text{VR}}^2 \\
& \quad - \frac{\lambda_C}{12}\beta \sum_{t=0}^{M-1} \mathbb{E}_{m,0}\|z_t^{(m)}\|^2 + (2K_3 + 2K_4)\beta.
\end{aligned}$$

Next, we move the term  $\sum_{t=0}^{M-1} \mathbb{E}_{m,0}\|z_t^{(m)}\|^2$  in the above inequality to the left-hand side and apply Jensen's inequality, we obtain that

$$\begin{aligned}
\frac{\lambda_C}{12}\beta M \mathbb{E}_{m,0}\|z^{(m)}\|^2 & \leq \|\tilde{z}^{(m-1)}\|^2 + 2\beta^2MH_{\text{VR}}^2 \\
& \quad + \left(\alpha^2 + \frac{2\alpha^2}{\lambda_C}\frac{1}{\beta}\right)M \cdot 2\left(\rho_{\max}\frac{1+\gamma}{\min|\lambda(C)|}\right)^2 G_{\text{VR}}^2 + (2K_3 + 2K_4)\beta.
\end{aligned}$$

793 Lastly, we divide  $\frac{\lambda_C}{12}\beta M$  on both sides of the above inequality and obtain that

$$\begin{aligned}\mathbb{E}\|\tilde{z}^{(m)}\|^2 &\leq \frac{1}{M\beta} \cdot \frac{12}{\lambda_C} \mathbb{E}\|\tilde{z}^{(m-1)}\|^2 + \beta \cdot \frac{24}{\lambda_C} H_{\text{VR}}^2 + \left(\frac{\alpha^2}{\beta} + \frac{2}{\lambda_C} \frac{\alpha^2}{\beta^2}\right) \cdot \frac{24}{\lambda_C} \left(\rho_{\max} \frac{1+\gamma}{\min|\lambda(C)|}\right)^2 G_{\text{VR}}^2 \\ &\quad + \frac{1}{M} \frac{24}{\lambda_C} (K_3 + K_4),\end{aligned}$$

794 which, after telescoping, leads to

$$\begin{aligned}\mathbb{E}\|\tilde{z}^{(m)}\|^2 &\leq \left(\frac{1}{M\beta} \cdot \frac{12}{\lambda_C}\right)^m \mathbb{E}\|\tilde{z}^{(0)}\|^2 \\ &\quad + \frac{1}{1 - \frac{1}{M\beta} \cdot \frac{12}{\lambda_C}} \left[ \beta \cdot \frac{24}{\lambda_C} H_{\text{VR}}^2 + \left(\frac{\alpha^2}{\beta} + \frac{2}{\lambda_C} \frac{\alpha^2}{\beta^2}\right) \cdot \frac{24}{\lambda_C} \left(\rho_{\max} \frac{1+\gamma}{\min|\lambda(C)|}\right)^2 G_{\text{VR}}^2 + \frac{1}{M} \frac{24}{\lambda_C} (K_3 + K_4) \right]\end{aligned}$$

795 To further simplify the above inequality, we assume  $\beta < 1$  and  $M\beta > \frac{24}{\lambda_C}$ . Then, we have

$$\begin{aligned}\mathbb{E}\|\tilde{z}^{(m)}\|^2 &\leq \left(\frac{1}{M\beta} \cdot \frac{12}{\lambda_C}\right)^m \mathbb{E}\|\tilde{z}^{(0)}\|^2 \\ &\quad + 2 \cdot \left[ \beta \cdot \frac{24}{\lambda_C} H_{\text{VR}}^2 + \frac{\alpha^2}{\beta^2} \cdot \left(1 + \frac{2}{\lambda_C}\right) \cdot \frac{24}{\lambda_C} \left(\rho_{\max} \frac{1+\gamma}{\min|\lambda(C)|}\right)^2 G_{\text{VR}}^2 + \frac{1}{M} \frac{24}{\lambda_C} (K_3 + K_4) \right].\end{aligned}$$

796 □

797 **Lemma H.3** (Preliminary Bound for  $\sum_{t=0}^{M-1} \|z_t^{(m)}\|^2$ ). *Under the same assumptions as those of*  
798 *Theorem 4.1, choose the learning rate  $\alpha$  and  $\beta$  such that*

$$\frac{\lambda_C}{12}\beta - 10\beta^2 - 10\gamma^2\rho_{\max}^2\left(\alpha^2 + \frac{2\alpha^2}{\lambda_C}\frac{1}{\beta}\right) \cdot \left(\rho_{\max} \frac{1+\gamma}{\min|\lambda(C)|}\right)^2 \geq \frac{\lambda_C}{16}\beta.$$

799 Then, the following preliminary bound holds.

$$\begin{aligned}&\frac{\lambda_C}{16}\beta \sum_{t=0}^{M-1} \mathbb{E}_{m,0} \|z_t^{(m)}\|^2 \\ &\leq \left[ 1 + \left[ 10\beta^2 + 10\gamma^2\rho_{\max}^2\left(\alpha^2 + \frac{2\alpha^2}{\lambda_C}\frac{1}{\beta}\right) \cdot \left(\rho_{\max} \frac{1+\gamma}{\min|\lambda(C)|}\right)^2 \right] M \right] \mathbb{E}_{m,0} \|\tilde{z}^{(m-1)}\|^2 \\ &\quad + 10(1+\gamma)^2\rho_{\max}^2 \cdot \left[ \left(1 + \frac{\gamma\rho_{\max}}{\min|\lambda(C)|}\right)^2 \left(\alpha^2 + \frac{2\alpha^2}{\lambda_C}\frac{1}{\beta}\right) \cdot \left(\rho_{\max} \frac{1+\gamma}{\min|\lambda(C)|}\right)^2 \right. \\ &\quad \left. + \left(1 + \frac{1}{\min|\lambda(C)|}\right)^2 \beta^2 \right] \left( \sum_{t=0}^{M-1} \mathbb{E}_{m,0} \|\theta_t^{(m)} - \theta^*\|^2 + M\mathbb{E}_{m,0} \|\tilde{\theta}^{(m-1)} - \theta^*\|^2 \right) \\ &\quad + (2K_3 + 2K_4)\beta + 10K_5\beta^2 + 10\left(\rho_{\max} \frac{1+\gamma}{\min|\lambda(C)|}\right)^2 K_1 \left(\alpha^2 + \frac{2\alpha^2}{\lambda_C}\frac{1}{\beta}\right).\end{aligned}$$

800 *Proof.* Similar to Lemma H.2, we firstly consider the one-step update of  $z_t^{(m)}$ :

$$\begin{aligned}\|z_{t+1}^{(m)}\|^2 &\leq \|z_t^{(m)}\|^2 + 2\beta^2 \|H_t^{(m)}(\theta_t^{(m)}, z_t^{(m)}) - H_t^{(m)}(\tilde{\theta}^{(m-1)}, \tilde{z}^{(m-1)}) + H^{(m)}(\tilde{\theta}^{(m-1)}, \tilde{z}^{(m-1)})\|^2 \\ &\quad + 2\|C^{-1}A(\theta_{t+1}^{(m)} - \theta_t^{(m)})\|^2 + 2\langle z_t^{(m)}, C^{-1}A(\theta_{t+1}^{(m)} - \theta_t^{(m)}) \rangle \\ &\quad + 2\beta\langle z_t^{(m)}, H_t^{(m)}(\theta_t^{(m)}, z_t^{(m)}) - H_t^{(m)}(\tilde{\theta}^{(m-1)}, \tilde{z}^{(m-1)}) + H^{(m)}(\tilde{\theta}^{(m-1)}, \tilde{z}^{(m-1)}) \rangle \\ &\leq \|z_t^{(m)}\|^2 + 2\beta^2 \|H_t^{(m)}(\theta_t^{(m)}, z_t^{(m)}) - H_t^{(m)}(\tilde{\theta}^{(m-1)}, \tilde{z}^{(m-1)}) + H^{(m)}(\tilde{\theta}^{(m-1)}, \tilde{z}^{(m-1)})\|^2 \\ &\quad + 2\|C^{-1}A(\theta_{t+1}^{(m)} - \theta_t^{(m)})\|^2 + \frac{\lambda_C}{2}\beta \|z_t^{(m)}\|^2 + \frac{2}{\lambda_C}\frac{1}{\beta} \|C^{-1}A(\theta_{t+1} - \theta_t)\|^2 \\ &\quad + 2\beta\langle z_t^{(m)}, H_t^{(m)}(\theta_t^{(m)}, z_t^{(m)}) - H_t^{(m)}(\tilde{\theta}^{(m-1)}, \tilde{z}^{(m-1)}) + H^{(m)}(\tilde{\theta}^{(m-1)}, \tilde{z}^{(m-1)}) \rangle \\ &\leq \|z_t^{(m)}\|^2 + \frac{\lambda_C}{2}\beta \|z_t^{(m)}\|^2 + 2\beta^2 \|H_t^{(m)}(\theta_t^{(m)}, z_t^{(m)}) - H_t^{(m)}(\tilde{\theta}^{(m-1)}, \tilde{z}^{(m-1)}) + H^{(m)}(\tilde{\theta}^{(m-1)}, \tilde{z}^{(m-1)})\|^2\end{aligned}$$

$$\begin{aligned}
& + \left( \alpha^2 + \frac{2\alpha^2}{\lambda_C} \frac{1}{\beta} \right) \cdot 2 \left( \rho_{\max} \frac{1+\gamma}{\min |\lambda(C)|} \right)^2 \|G_t^{(m)}(\theta_t^{(m)}, z_t^{(m)}) - G_t^{(m)}(\tilde{\theta}^{(m-1)}, \tilde{z}^{(m-1)}) + G^{(m)}(\tilde{\theta}^{(m-1)}, \tilde{z}^{(m-1)})\| \\
& + 2\beta \langle z_t^{(m)}, H_t^{(m)}(\theta_t^{(m)}, z_t^{(m)}) - H_t^{(m)}(\tilde{\theta}^{(m-1)}, \tilde{z}^{(m-1)}) + H^{(m)}(\tilde{\theta}^{(m-1)}, \tilde{z}^{(m-1)}) \rangle
\end{aligned} \tag{62}$$

where the second inequality applies the polarization identity to  $\langle z_t^{(m)}, C^{-1}A(\theta_{t+1}^{(m)} - \theta_t^{(m)}) \rangle$ . For the last term of eq. (62), it is bounded by eq. (61) as

$$\begin{aligned}
& \mathbb{E}_{m,0} \langle z_t^{(m)}, H_t^{(m)}(\theta_t^{(m)}, z_t^{(m)}) - H_t^{(m)}(\tilde{\theta}^{(m-1)}, \tilde{z}^{(m-1)}) + H^{(m)}(\tilde{\theta}^{(m-1)}, \tilde{z}^{(m-1)}) \rangle \\
& \leq -\frac{7\lambda_C}{24} \mathbb{E}_{m,0} \|z_t^{(m)}\|^2 + \frac{K_3 + K_4}{M}.
\end{aligned}$$

To further bound eq. (62), we apply Lemma I.6 to bound its fourth term and apply Lemma I.7 to bound its third term. Then, we obtain that

$$\begin{aligned}
& \mathbb{E}_{m,0} \|z_{t+1}^{(m)}\|^2 \\
& \leq \mathbb{E}_{m,0} \|z_t^{(m)}\|^2 - \frac{\lambda_C}{12} \beta \mathbb{E}_{m,0} \|z_t^{(m)}\|^2 + \frac{2K_3 + 2K_4}{M} \beta \\
& \quad + 2\beta^2 \left[ 5 \left( \mathbb{E}_{m,0} \|z_t^{(m)}\|^2 + \mathbb{E}_{m,0} \|\tilde{z}^{(m-1)}\|^2 \right) + \frac{5K_5}{M} \right. \\
& \quad \left. + 5(1+\gamma)^2 \rho_{\max}^2 \left( 1 + \frac{1}{\min |\lambda(C)|} \right)^2 \left( \mathbb{E}_{m,0} \|\theta_t^{(m)} - \theta^*\|^2 + \mathbb{E}_{m,0} \|\tilde{\theta}^{(m-1)} - \theta^*\|^2 \right) \right] \\
& \quad + \left( \alpha^2 + \frac{2\alpha^2}{\lambda_C} \frac{1}{\beta} \right) \cdot 2 \left( \rho_{\max} \frac{1+\gamma}{\min |\lambda(C)|} \right)^2 \left[ 5\gamma^2 \rho_{\max}^2 \left( \mathbb{E}_{m,0} \|z_t^{(m)}\|^2 + \mathbb{E}_{m,0} \|\tilde{z}^{(m-1)}\|^2 \right) + \frac{5K_1}{M} \right. \\
& \quad \left. + 5(1+\gamma)^2 \rho_{\max}^2 \left( 1 + \frac{\gamma \rho_{\max}}{\min |\lambda(C)|} \right)^2 \left( \mathbb{E}_{m,0} \|\theta_t^{(m)} - \theta^*\|^2 + \mathbb{E}_{m,0} \|\tilde{\theta}^{(m-1)} - \theta^*\|^2 \right) \right].
\end{aligned}$$

Next, we re-arrange the above inequality and obtain that

$$\begin{aligned}
& \mathbb{E}_{m,0} \|z_{t+1}^{(m)}\|^2 \\
& \leq \mathbb{E}_{m,0} \|z_t^{(m)}\|^2 - \left[ \frac{\lambda_C}{12} \beta - 10\beta^2 - 10\gamma^2 \rho_{\max}^2 \left( \alpha^2 + \frac{2\alpha^2}{\lambda_C} \frac{1}{\beta} \right) \cdot \left( \rho_{\max} \frac{1+\gamma}{\min |\lambda(C)|} \right)^2 \right] \mathbb{E}_{m,0} \|z_t^{(m)}\|^2 \\
& \quad + \left[ 10\beta^2 + 10\gamma^2 \rho_{\max}^2 \left( \alpha^2 + \frac{2\alpha^2}{\lambda_C} \frac{1}{\beta} \right) \cdot \left( \rho_{\max} \frac{1+\gamma}{\min |\lambda(C)|} \right)^2 \right] \mathbb{E}_{m,0} \|\tilde{z}^{(m-1)}\|^2 \\
& \quad + 10(1+\gamma)^2 \rho_{\max}^2 \cdot \left[ \left( 1 + \frac{\gamma \rho_{\max}}{\min |\lambda(C)|} \right)^2 \left( \alpha^2 + \frac{2\alpha^2}{\lambda_C} \frac{1}{\beta} \right) \cdot \left( \rho_{\max} \frac{1+\gamma}{\min |\lambda(C)|} \right)^2 \right. \\
& \quad \left. + \left( 1 + \frac{1}{\min |\lambda(C)|} \right)^2 \beta^2 \right] \left( \mathbb{E}_{m,0} \|\theta_t^{(m)} - \theta^*\|^2 + \mathbb{E}_{m,0} \|\tilde{\theta}^{(m-1)} - \theta^*\|^2 \right) \\
& \quad + \frac{1}{M} \cdot \left[ (2K_3 + 2K_4)\beta + 10K_5\beta^2 + 10 \left( \rho_{\max} \frac{1+\gamma}{\min |\lambda(C)|} \right)^2 K_1 \left( \alpha^2 + \frac{2\alpha^2}{\lambda_C} \frac{1}{\beta} \right) \right].
\end{aligned}$$

Telescoping the above inequality over one batch, we obtain that

$$\begin{aligned}
& \left[ \frac{\lambda_C}{12} \beta - 10\beta^2 - 10\gamma^2 \rho_{\max}^2 \left( \alpha^2 + \frac{2\alpha^2}{\lambda_C} \frac{1}{\beta} \right) \cdot \left( \rho_{\max} \frac{1+\gamma}{\min |\lambda(C)|} \right)^2 \right] \sum_{t=0}^{M-1} \mathbb{E}_{m,0} \|z_t^{(m)}\|^2 \\
& \leq \left[ 1 + \left[ 10\beta^2 + 10\gamma^2 \rho_{\max}^2 \left( \alpha^2 + \frac{2\alpha^2}{\lambda_C} \frac{1}{\beta} \right) \cdot \left( \rho_{\max} \frac{1+\gamma}{\min |\lambda(C)|} \right)^2 \right] M \right] \mathbb{E}_{m,0} \|\tilde{z}^{(m-1)}\|^2 \\
& \quad + 10(1+\gamma)^2 \rho_{\max}^2 \cdot \left[ \left( 1 + \frac{\gamma \rho_{\max}}{\min |\lambda(C)|} \right)^2 \left( \alpha^2 + \frac{2\alpha^2}{\lambda_C} \frac{1}{\beta} \right) \cdot \left( \rho_{\max} \frac{1+\gamma}{\min |\lambda(C)|} \right)^2 \right. \\
& \quad \left. + \left( 1 + \frac{1}{\min |\lambda(C)|} \right)^2 \beta^2 \right] \left( \sum_{t=0}^{M-1} \mathbb{E}_{m,0} \|\theta_t^{(m)} - \theta^*\|^2 + M \mathbb{E}_{m,0} \|\tilde{\theta}^{(m-1)} - \theta^*\|^2 \right) \\
& \quad + (2K_3 + 2K_4)\beta + 10K_5\beta^2 + 10 \left( \rho_{\max} \frac{1+\gamma}{\min |\lambda(C)|} \right)^2 K_1 \left( \alpha^2 + \frac{2\alpha^2}{\lambda_C} \frac{1}{\beta} \right)
\end{aligned}$$

807 To simplify the above inequality, we assume  $\frac{\lambda_C}{12}\beta = 10\beta^2 = 10\gamma^2\rho_{\max}^2(\alpha^2 +$   
808  $\frac{2\alpha^2}{\lambda_C}\frac{1}{\beta})(\rho_{\max}\frac{1+\gamma}{\min|\lambda(C)|})^2 \geq \frac{\lambda_C}{16}\beta$  and obtain the desired result.  $\square$

## 809 I Other Supporting Lemmas for Proving Theorem 4.1

810 **Lemma I.1.** *Under the same assumption as those of Theorem 4.1, the following inequality holds.*

$$\mathbb{E}_{m,0}\|\hat{A}^{(m)}\theta^* + \hat{b}^{(m)}\|^2 \leq \frac{K_1}{M},$$

811 where  $K_1$  is defined as

$$K_1 := \left[(1+\gamma)R_\theta + r_{\max}\right]^2 \rho_{\max}^2 \left(1 + \frac{\gamma\rho_{\max}}{\min|\lambda(C)|}\right)^2 \cdot \left(1 + \kappa \frac{2\rho}{1-\rho}\right). \quad (63)$$

812 *Proof.* Recall that  $\hat{A}^{(m)} = \sum_{t=0}^{M-1} \hat{A}_t^{(m)}$  and  $\hat{b}^{(m)} = \sum_{t=0}^{M-1} \hat{b}_t^{(m)}$ . We expand the square as follows:

$$\begin{aligned} \|\hat{A}^{(m)}\theta^* + \hat{b}^{(m)}\|^2 &\leq \left\| \sum_{t=0}^{M-1} \hat{A}_t^{(m)}\theta^* + \sum_{t=0}^{M-1} \hat{b}_t^{(m)} \right\|^2 \\ &= \frac{1}{M^2} \left[ \sum_{i=j} \|\hat{A}_i^{(m)}\theta^* + \hat{b}_i^{(m)}\|^2 + \sum_{i \neq j} \langle \hat{A}_i^{(m)}\theta^* + \hat{b}_i^{(m)}, \hat{A}_j^{(m)}\theta^* + \hat{b}_j^{(m)} \rangle \right] \\ &\leq \frac{1}{M} \cdot \left[(1+\gamma)R_\theta + r_{\max}\right]^2 \rho_{\max}^2 \left(1 + \frac{\gamma\rho_{\max}}{\min|\lambda(C)|}\right)^2 + \frac{1}{M^2} \sum_{i \neq j} \langle \hat{A}_i^{(m)}\theta^* + \hat{b}_i^{(m)}, \hat{A}_j^{(m)}\theta^* + \hat{b}_j^{(m)} \rangle, \end{aligned}$$

813 where in the last step we apply Lemma J.2 to bound the first term. Now we consider the conditional  
814 expectation of the second inner product term. Without loss of generality, we assume  $i < j$ , then

$$\begin{aligned} &\mathbb{E}_{m,0} \langle \hat{A}_i^{(m)}\theta^* + \hat{b}_i^{(m)}, \hat{A}_j^{(m)}\theta^* + \hat{b}_j^{(m)} \rangle \\ &= \mathbb{E}_{m,0} \langle \hat{A}_i^{(m)}\theta^* + \hat{b}_i^{(m)}, \mathbb{E}_{m,i} [\hat{A}_j^{(m)}\theta^* + \hat{b}_j^{(m)}] \rangle \\ &\leq \left[(1+\gamma)R_\theta + r_{\max}\right] \rho_{\max} \left(1 + \frac{\gamma\rho_{\max}}{\min|\lambda(C)|}\right) \cdot \mathbb{E}_{m,0} \|\mathbb{E}_{m,i} [\hat{A}_j^{(m)}\theta^* - \hat{A}\theta^*] + \hat{A}\theta^* + (\hat{b}_j^{(m)} - \hat{b}) + \hat{b}\| \\ &\leq \left[(1+\gamma)R_\theta + r_{\max}\right] \rho_{\max} \left(1 + \frac{\gamma\rho_{\max}}{\min|\lambda(C)|}\right) \cdot \left[ \mathbb{E}_{m,0} (\|\mathbb{E}_{m,i} \hat{A}_j^{(m)} - \hat{A}\| R_\theta) + \mathbb{E}_{m,0} (\|\mathbb{E}_{m,i} \hat{b}_j^{(m)} - \hat{b}\|) \right] \end{aligned} \quad (64)$$

815 where in the last inequality we apply the equation  $\hat{A}\theta^* = (A - BC^{-1}A)(-A^{-1}b) = -b + BC^{-1}b =$   
816  $-\hat{b}$ . Moreover, by Assumption 2.3, we have

$$\begin{aligned} \|\mathbb{E}_{m,i} \hat{A}_j^{(m)} - \hat{A}\| &= \left\| \int \hat{A}(s) d\mathbb{P}(\cdot | s_{j-i}^{(m)}) - \int \hat{A}(s) d\mu_{\pi_b} \right\| \\ &\leq \|\hat{A}(s)\| \cdot \text{dist}(\mathbb{P}(\cdot | s_{j-i}^{(m)}), \mu_{\pi_b}) \\ &\leq (1+\gamma)\rho_{\max} \left(1 + \frac{\gamma\rho_{\max}}{\min|\lambda(C)|}\right) \kappa \rho^{j-i}. \end{aligned} \quad (65)$$

817 Similarly,

$$\|\mathbb{E}_{m,i} \hat{b}_j^{(m)} - \hat{b}\| \leq \rho_{\max} r_{\max} \left(1 + \frac{\gamma\rho_{\max}}{\min|\lambda(C)|}\right) \kappa \rho^{j-i}. \quad (66)$$

818 Substituting eq. (65) and eq. (66) into eq. (64) yields that

$$\begin{aligned} &\mathbb{E}_{m,0} \sum_{i \neq j} \langle \hat{A}_i^{(m)}\theta^* + \hat{b}_i^{(m)}, \hat{A}_j^{(m)}\theta^* + \hat{b}_j^{(m)} \rangle \\ &\leq \left[(1+\gamma)R_\theta + r_{\max}\right]^2 \rho_{\max}^2 \left(1 + \frac{\gamma\rho_{\max}}{\min|\lambda(C)|}\right)^2 \cdot \kappa \frac{2M\rho}{1-\rho}, \end{aligned}$$

819 which leads to the desired bound

$$\mathbb{E}_{m,0} \|\hat{A}^{(m)}\theta^* + \hat{b}^{(m)}\|^2 \leq \frac{1}{M} \cdot \left[(1+\gamma)R_\theta + r_{\max}\right]^2 \rho_{\max}^2 \left(1 + \frac{\gamma\rho_{\max}}{\min|\lambda(C)|}\right)^2 \cdot \left(1 + \kappa \frac{2\rho}{1-\rho}\right).$$

820  $\square$

821 **Lemma I.2.** *Under the same assumptions as those of Theorem 4.1, the following inequality holds:*

$$\mathbb{E}_{m,0} \langle \theta_t^{(m)} - \theta^*, (\hat{A}^{(m)} - \hat{A})\theta_t^{(m)} + (\hat{b}^{(m)} - \hat{b}) \rangle \leq \frac{\lambda_{\hat{A}}}{4} \mathbb{E}_{m,0} \|\theta_t^{(m)} - \theta^*\|^2 + \frac{K_2}{M},$$

822 where  $K_2$  is defined as

$$K_2 := \frac{2}{\lambda_{\hat{A}}} \left[ R_\theta^2 (1 + \gamma)^2 + r_{\max}^2 \right] \cdot 4\rho_{\max}^2 \left( 1 + \frac{\gamma\rho_{\max}}{\min |\lambda(C)|} \right)^2 \left[ 1 + \kappa \frac{\rho}{1 - \rho} \right]. \quad (67)$$

823 *Proof.* By the polarization identity and the Jensen's inequality, we obtain that

$$\begin{aligned} & \mathbb{E}_{m,0} \langle \theta_t^{(m)} - \theta^*, (\hat{A}^{(m)} - \hat{A})\theta_t^{(m)} + (\hat{b}^{(m)} - \hat{b}) \rangle \\ & \leq \frac{1}{2} \cdot \frac{\lambda_{\hat{A}}}{2} \mathbb{E}_{m,0} \|\theta_t^{(m)} - \theta^*\|^2 + \frac{1}{2} \cdot \frac{2}{\lambda_{\hat{A}}} \mathbb{E}_{m,0} \|(\hat{A}^{(m)} - \hat{A})\theta_t^{(m)} + (\hat{b}^{(m)} - \hat{b})\|^2 \\ & \leq \frac{\lambda_{\hat{A}}}{4} \mathbb{E}_{m,0} \|\theta_t^{(m)} - \theta^*\|^2 + \frac{2}{\lambda_{\hat{A}}} R_\theta^2 \mathbb{E}_{m,0} \|\hat{A}^{(m)} - \hat{A}\|^2 + \frac{2}{\lambda_{\hat{A}}} \mathbb{E}_{m,0} \|\hat{b}^{(m)} - \hat{b}\|^2. \end{aligned}$$

824 Next, we further bound  $\mathbb{E}_{m,0} \|\hat{A}^{(m)} - \hat{A}\|^2$  and  $\mathbb{E}_{m,0} \|\hat{b}^{(m)} - \hat{b}\|^2$ , respectively.

$$\begin{aligned} \mathbb{E}_{m,0} \|\hat{A}^{(m)} - \hat{A}\|^2 & \leq \mathbb{E}_{m,0} \|\hat{A}^{(m)} - \hat{A}\|_F^2 \\ & \leq \frac{1}{M^2} \mathbb{E}_{m,0} \left[ \sum_{i=j} \|\hat{A}_i^{(m)} - \hat{A}\|_F^2 + \sum_{i \neq j} \langle \hat{A}_i^{(m)} - \hat{A}, \hat{A}_j^{(m)} - \hat{A} \rangle \right] \\ & \leq \frac{1}{M^2} \mathbb{E}_{m,0} \left[ 4(1 + \gamma)^2 \rho_{\max}^2 \left( 1 + \frac{\gamma\rho_{\max}}{\min |\lambda(C)|} \right)^2 M + \sum_{i \neq j} \langle \hat{A}_i^{(m)} - \hat{A}, \hat{A}_j^{(m)} - \hat{A} \rangle \right]. \end{aligned}$$

825 For the last inner product term, without loss of generality, assume  $i < j$  and we obtain that

$$\begin{aligned} & \mathbb{E}_{m,0} \langle \hat{A}_i^{(m)} - \hat{A}, \hat{A}_j^{(m)} - \hat{A} \rangle \\ & \leq \mathbb{E}_{m,0} \langle \hat{A}_i^{(m)} - \hat{A}, \mathbb{E}_{m,i} \hat{A}_j^{(m)} - \hat{A} \rangle \\ & \leq 2(1 + \gamma) \rho_{\max} \left( 1 + \frac{\gamma\rho_{\max}}{\min |\lambda(C)|} \right) \mathbb{E}_{m,0} \|\mathbb{E}_{m,i} \hat{A}_j^{(m)} - \hat{A}\|_F \\ & \leq 2(1 + \gamma)^2 \rho_{\max}^2 \left( 1 + \frac{\gamma\rho_{\max}}{\min |\lambda(C)|} \right)^2 \kappa \rho^{j-i}. \end{aligned} \quad (68)$$

826 Summing the above inequality over all  $i \neq j$  yields that

$$\mathbb{E}_{m,0} \sum_{i \neq j} \langle \hat{A}_i^{(m)} - \hat{A}, \hat{A}_j^{(m)} - \hat{A} \rangle \leq 4(1 + \gamma)^2 \rho_{\max}^2 \left( 1 + \frac{\gamma\rho_{\max}}{\min |\lambda(C)|} \right)^2 \kappa \frac{M\rho}{1 - \rho},$$

827 which implies that

$$\mathbb{E}_{m,0} \|\hat{A}^{(m)} - \hat{A}\|^2 \leq \frac{1}{M} \cdot 4(1 + \gamma)^2 \rho_{\max}^2 \left( 1 + \frac{\gamma\rho_{\max}}{\min |\lambda(C)|} \right)^2 \left[ 1 + \kappa \frac{\rho}{1 - \rho} \right]. \quad (69)$$

828 Following the same approach, we obtain that

$$\mathbb{E}_{m,0} \|\hat{b}^{(m)} - \hat{b}\|^2 \leq \frac{1}{M} \cdot 4\rho_{\max}^2 r_{\max}^2 \left( 1 + \frac{\gamma\rho_{\max}}{\min |\lambda(C)|} \right)^2 \left[ 1 + \kappa \frac{\rho}{1 - \rho} \right]. \quad (70)$$

829 Combining eqs. (68), (69) and (70), we obtain that

$$\begin{aligned} & \mathbb{E}_{m,0} \langle \theta_t^{(m)} - \theta^*, (\hat{A}^{(m)} - \hat{A})\theta_t^{(m)} + (\hat{b}^{(m)} - \hat{b}) \rangle \\ & \leq \frac{\lambda_{\hat{A}}}{4} \mathbb{E}_{m,0} \|\theta_t^{(m)} - \theta^*\|^2 + \frac{1}{M} \cdot \frac{2}{\lambda_{\hat{A}}} \left[ R_\theta^2 (1 + \gamma)^2 + r_{\max}^2 \right] \cdot 4\rho_{\max}^2 \left( 1 + \frac{\gamma\rho_{\max}}{\min |\lambda(C)|} \right)^2 \left[ 1 + \kappa \frac{\rho}{1 - \rho} \right]. \end{aligned}$$

830  $\square$

831 **Lemma I.3.** *Under the same assumption as those of Theorem 4.1, the following inequality holds:*

$$\mathbb{E}_{m,0}\langle z_t^{(m)}, \bar{A}^{(m)}\theta_t^{(m)} + \bar{b}^{(m)} \rangle \leq \frac{\lambda_C}{8} \mathbb{E}_{m,0}\|z_t^{(m)}\|^2 + \frac{K_3}{M}$$

832 where  $K_3$  is defined as

$$K_3 := \left( \frac{32}{\lambda_C} \left[ R_\theta^2(1+\gamma)^2 + r_{\max}^2 \right] \cdot \rho_{\max}^2 + \frac{16}{\lambda_C} \frac{\rho_{\max}(1+\gamma)R_\theta + \rho_{\max}r_{\max}}{\min |\lambda(C)|} \right) \left[ 1 + \kappa \frac{\rho}{1-\rho} \right]. \quad (71)$$

833 *Proof.* Note that the following equations hold.

$$\begin{aligned} \mathbb{E}_{m,0}\langle z_t^{(m)}, \bar{A}^{(m)}\theta_t^{(m)} + \bar{b}^{(m)} \rangle &= \mathbb{E}_{m,0}\langle z_t^{(m)}, (A^{(m)} - C^{(m)}C^{-1}A)\theta_t^{(m)} + b^{(m)} - C^{(m)}C^{-1}b \rangle \\ &= \mathbb{E}_{m,0}\langle z_t^{(m)}, (A^{(m)} - A)\theta_t^{(m)} + b^{(m)} - b \rangle \\ &\quad - \mathbb{E}_{m,0}\langle z_t^{(m)}, (C^{(m)} - C)C^{-1}A\theta_t^{(m)} + (C^{(m)} - C)C^{-1}b \rangle. \end{aligned} \quad (72)$$

834 For the first term of eq. (72), we bound it using the polarization identity and Jensen's inequality as  
835 follows.

$$\begin{aligned} &\mathbb{E}_{m,0}\langle z_t^{(m)}, (A^{(m)} - A)\theta_t^{(m)} + b^{(m)} - b \rangle \\ &\leq \frac{1}{2} \cdot \frac{\lambda_C}{8} \mathbb{E}_{m,0}\|z_t^{(m)}\|^2 + \frac{1}{2} \cdot \frac{8}{\lambda_C} \mathbb{E}_{m,0}\|(A^{(m)} - A)\theta_t^{(m)} + b^{(m)} - b\|^2 \\ &\leq \frac{\lambda_C}{16} \mathbb{E}_{m,0}\|z_t^{(m)}\|^2 + \frac{8}{\lambda_C} \left( R_\theta^2 \mathbb{E}_{m,0}\|A^{(m)} - A\|_F^2 + \mathbb{E}_{m,0}\|b^{(m)} - b\|^2 \right). \end{aligned}$$

836 Then, following a similar proof logic as that of Lemma I.2, we obtain that

$$\mathbb{E}_{m,0}\|A^{(m)} - A\|_F^2 \leq \frac{1}{M} \cdot 4(1+\gamma)^2 \rho_{\max}^2 \left[ 1 + \kappa \frac{\rho}{1-\rho} \right],$$

837 and

$$\mathbb{E}_{m,0}\|b^{(m)} - b\|^2 \leq \frac{1}{M} \cdot 4\rho_{\max}^2 r_{\max}^2 \left[ 1 + \kappa \frac{\rho}{1-\rho} \right].$$

838 Combining the above bounds, we obtain the following bound for the first term of eq. (72)

$$\begin{aligned} &\mathbb{E}_{m,0}\langle z_t^{(m)}, (A^{(m)} - A)\theta_t^{(m)} + b^{(m)} - b \rangle \\ &\leq \frac{\lambda_C}{16} \mathbb{E}_{m,0}\|z_t^{(m)}\|^2 + \frac{1}{M} \cdot \frac{32}{\lambda_C} \left[ R_\theta^2(1+\gamma)^2 + r_{\max}^2 \right] \cdot \rho_{\max}^2 \left[ 1 + \kappa \frac{\rho}{1-\rho} \right]. \end{aligned} \quad (73)$$

839 For the second term of eq. (72), we have

$$\begin{aligned} &-\mathbb{E}_{m,0}\langle z_t^{(m)}, (C^{(m)} - C)C^{-1}A\theta_t^{(m)} + (C^{(m)} - C)C^{-1}b \rangle \\ &\leq \frac{1}{2} \cdot \frac{\lambda_C}{8} \mathbb{E}_{m,0}\|z_t^{(m)}\|^2 + \frac{1}{2} \cdot \frac{8}{\lambda_C} \mathbb{E}_{m,0}\|C^{(m)} - C\|_F^2 \cdot \frac{\rho_{\max}(1+\gamma)R_\theta + \rho_{\max}r_{\max}}{\min |\lambda(C)|}. \end{aligned}$$

840 Moreover, note that

$$\mathbb{E}_{m,0}\|C^{(m)} - C\|_F^2 \leq \frac{1}{M} \cdot 4 \left[ 1 + \kappa \frac{\rho}{1-\rho} \right],$$

841 and therefore we have

$$\begin{aligned} &-\mathbb{E}_{m,0}\langle z_t^{(m)}, (C^{(m)} - C)C^{-1}A\theta_t^{(m)} + (C^{(m)} - C)C^{-1}b \rangle \\ &\leq \frac{\lambda_C}{16} \mathbb{E}_{m,0}\|z_t^{(m)}\|^2 + \frac{1}{M} \cdot \frac{16}{\lambda_C} \frac{\rho_{\max}(1+\gamma)R_\theta + \rho_{\max}r_{\max}}{\min |\lambda(C)|} \left[ 1 + \kappa \frac{\rho}{1-\rho} \right] \end{aligned} \quad (74)$$

842 Combining eqs. (72), (73) and (74), we obtain that

$$\begin{aligned} &\mathbb{E}_{m,0}\langle z_t^{(m)}, \bar{A}^{(m)}\theta_t^{(m)} + \bar{b}^{(m)} \rangle \\ &\leq \frac{\lambda_C}{8} \mathbb{E}_{m,0}\|z_t^{(m)}\|^2 + \frac{1}{M} \cdot \left( \frac{32}{\lambda_C} \left[ R_\theta^2(1+\gamma)^2 + r_{\max}^2 \right] \cdot \rho_{\max}^2 + \frac{16}{\lambda_C} \frac{\rho_{\max}(1+\gamma)R_\theta + \rho_{\max}r_{\max}}{\min |\lambda(C)|} \right) \left[ 1 + \kappa \frac{\rho}{1-\rho} \right]. \end{aligned}$$

843  $\square$



**Lemma I.4.** *Under the same assumptions as those of Theorem 4.1, the following inequality holds:*

$$\mathbb{E}_{m,0} \langle z_t^{(m)}, (C^{(m)} - C) z_t^{(m)} \rangle \leq \frac{\lambda_C}{12} \mathbb{E}_{m,0} \|z_t^{(m)}\|^2 + \frac{K_4}{M},$$

844 where  $K_4$  is defined as

$$K_4 := \frac{12}{\lambda_C} R_w^2 \left[ 1 + \kappa \frac{\rho}{1 - \rho} \right]. \quad (75)$$

845 *Proof.* The proof is very similar to that of Lemma I.2 and Lemma I.3, and we only outline the proof  
846 below.

$$\begin{aligned} \mathbb{E}_{m,0} \langle z_t^{(m)}, (C^{(m)} - C) z_t^{(m)} \rangle &\leq \frac{1}{2} \frac{\lambda_C}{6} \mathbb{E}_{m,0} \|z_t^{(m)}\|^2 + \frac{1}{2} \frac{6}{\lambda_C} R_w^2 \mathbb{E}_{m,0} \|C^{(m)} - C\|_F^2 \\ &\leq \frac{\lambda_C}{12} \mathbb{E}_{m,0} \|z_t^{(m)}\|^2 + \frac{1}{M} \cdot \frac{12}{\lambda_C} R_w^2 \left[ 1 + \kappa \frac{\rho}{1 - \rho} \right]. \end{aligned}$$

847

□

**Lemma I.5.** *Under the same assumptions as those of Theorem 4.1, the following inequality holds:*

$$\mathbb{E}_{m,0} \|\bar{A}^{(m)} \theta^* + \bar{b}^{(m)}\|^2 \leq \frac{K_5}{M}$$

848 where  $K_5$  is defined as

$$K_5 := \left[ (1 + \gamma) R_\theta + r_{\max} \right]^2 \rho_{\max}^2 \left( 1 + \frac{1}{\min |\lambda(C)|} \right)^2 \cdot \left( 1 + \kappa \frac{2\rho}{1 - \rho} \right). \quad (76)$$

849 *Proof.* The proof is similar to that of Lemma I.1 and we outline the proof below. We obtain that

$$\begin{aligned} &\mathbb{E}_{m,0} \|\bar{A}^{(m)} \theta^* + \bar{b}^{(m)}\|^2 \\ &\leq \frac{1}{M^2} \mathbb{E}_{m,0} \left[ \sum_{i=j} \|\bar{A}_i^{(m)} \theta^* + \bar{b}_i^{(m)}\|^2 + \sum_{i \neq j} \langle \bar{A}_i^{(m)} \theta^* + \bar{b}_i^{(m)}, \bar{A}_j^{(m)} \theta^* + \bar{b}_j^{(m)} \rangle \right] \\ &\leq \frac{1}{M^2} \left[ M \cdot \left[ (1 + \gamma) R_\theta + r_{\max} \right]^2 \rho_{\max}^2 \left( 1 + \frac{1}{\min |\lambda(C)|} \right)^2 + \sum_{i \neq j} \mathbb{E}_{m,0} \langle \bar{A}_i^{(m)} \theta^* + \bar{b}_i^{(m)}, \bar{A}_j^{(m)} \theta^* + \bar{b}_j^{(m)} \rangle \right]. \end{aligned} \quad (77)$$

850 Consider the last term of eq. (77). Without loss of generality, assume that  $i < j$ . Then

$$\begin{aligned} &\mathbb{E}_{m,0} \langle \bar{A}_i^{(m)} \theta^* + \bar{b}_i^{(m)}, \bar{A}_j^{(m)} \theta^* + \bar{b}_j^{(m)} \rangle \\ &= \mathbb{E}_{m,0} \langle \bar{A}_i^{(m)} \theta^* + \bar{b}_i^{(m)}, \mathbb{E}_{m,i} \bar{A}_j^{(m)} \theta^* + \mathbb{E}_{m,i} \bar{b}_j^{(m)} \rangle \\ &\leq \mathbb{E}_{m,0} \|\bar{A}_i^{(m)} \theta^* + \bar{b}_i^{(m)}\| \cdot \mathbb{E}_{m,0} \left[ \|\mathbb{E}_{m,i} \bar{A}_j^{(m)} - \bar{A}\| \theta^* + \|\mathbb{E}_{m,i} \bar{b}_j^{(m)} - \bar{b}\| \right] \\ &\leq \left[ (1 + \gamma) R_\theta + r_{\max} \right]^2 \rho_{\max}^2 \left( 1 + \frac{1}{\min |\lambda(C)|} \right)^2 \cdot \kappa \rho^{j-i} \end{aligned}$$

851 Summing the above inequality over all  $i \neq j$  and substituting it into eq. (77), we obtain that

$$\begin{aligned} &\mathbb{E}_{m,0} \|\bar{A}^{(m)} \theta^* + \bar{b}^{(m)}\|^2 \\ &\leq \frac{1}{M} \cdot \left[ (1 + \gamma) R_\theta + r_{\max} \right]^2 \rho_{\max}^2 \left( 1 + \frac{1}{\min |\lambda(C)|} \right)^2 \cdot \left( 1 + \kappa \frac{2\rho}{1 - \rho} \right). \end{aligned}$$

852

□

853 **Lemma I.6** (One-Step Update of  $\theta_t^{(m)}$ ). *Under the same assumption as those of Theorem 4.1, the*  
854 *square norm of one-step update of  $\theta_t^{(m)}$  using Algorithm 2 is bounded as*

$$\begin{aligned} &\mathbb{E}_{m,0} \|G_t^{(m)}(\theta_t^{(m)}, z_t^{(m)}) - G_t^{(m)}(\tilde{\theta}^{(m-1)}, \tilde{z}^{(m-1)}) + G^{(m)}(\tilde{\theta}^{(m-1)}, \tilde{z}^{(m-1)})\|^2 \\ &\leq 5(1 + \gamma)^2 \rho_{\max}^2 \left( 1 + \frac{\gamma \rho_{\max}}{\min |\lambda(C)|} \right)^2 \left( \mathbb{E}_{m,0} \|\theta_t^{(m)} - \theta^*\|^2 + \mathbb{E}_{m,0} \|\tilde{\theta}^{(m-1)} - \theta^*\|^2 \right) \\ &\quad + 5\gamma^2 \rho_{\max}^2 \left( \mathbb{E}_{m,0} \|z_t^{(m)}\|^2 + \mathbb{E}_{m,0} \|\tilde{z}^{(m-1)}\|^2 \right) + \frac{5K_1}{M} \end{aligned}$$

855 where  $K_1$  is specified in (63) of Lemma I.1.

856 *Proof.* By the definitions of  $G_t^{(m)}(\cdot)$  and  $G^{(m)}(\cdot)$  and the one-step update of  $\theta_t^{(m)}$ , we obtain that

$$\begin{aligned}
& \|G_t^{(m)}(\theta_t^{(m)}, z_t^{(m)}) - G_t^{(m)}(\tilde{\theta}^{(m-1)}, \tilde{z}^{(m-1)}) + G^{(m)}(\tilde{\theta}^{(m-1)}, \tilde{z}^{(m-1)})\|^2 \\
&= \|\hat{A}_t^{(m)}\theta_t^{(m)} + \hat{b}_t^{(m)} + B_t^{(m)}z_t^{(m)} - \hat{A}_t^{(m)}\tilde{\theta}^{(m-1)} - \hat{b}_t^{(m)} - B_t^{(m)}\tilde{z}^{(m-1)} + \hat{A}^{(m)}\tilde{\theta}^{(m-1)} + \hat{b}^{(m)} + B^{(m)}\tilde{z}^{(m-1)}\|^2 \\
&= \left\| \left( \hat{A}_t^{(m)}\theta_t^{(m)} - \hat{A}_t^{(m)}\theta^* \right) + \left( \hat{A}_t^{(m)}\theta^* - \hat{A}_t^{(m)}\tilde{\theta}^{(m-1)} + \hat{A}^{(m)}\tilde{\theta}^{(m-1)} - \hat{A}^{(m)}\theta^* \right) + \left( \hat{A}^{(m)}\theta^* + \hat{b}^{(m)} \right) \right. \\
&\quad \left. + B_t^{(m)}z_t^{(m)} - B_t^{(m)}\tilde{z}^{(m-1)} + B^{(m)}\tilde{z}^{(m-1)} \right\|^2 \\
&\leq 5\|\hat{A}_t^{(m)}\|^2\|\theta_t^{(m)} - \theta^*\|^2 + 5\left\| \left( \hat{A}_t^{(m)}\tilde{\theta}^{(m-1)} - \hat{A}_t^{(m)}\theta^* \right) - \left( \hat{A}^{(m)}\tilde{\theta}^{(m-1)} - \hat{A}^{(m)}\theta^* \right) \right\|^2 + 5\|\hat{A}^{(m)}\theta^* + \hat{b}^{(m)}\|^2 \\
&\quad + 5\|B_t^{(m)}\|^2\|z_t^{(m)}\|^2 + 5\|B_t^{(m)}\tilde{z}^{(m-1)} - B^{(m)}\tilde{z}^{(m-1)}\|^2
\end{aligned} \tag{78}$$

857 where the last step applies Jensen's inequality. Next, we bound the third term of eq. (78)  $\|\hat{A}^{(m)}\theta^* +$   
858  $\hat{b}^{(m)}\|^2$  using Lemma I.1, and note that the second term of eq. (78) can be bounded as

$$\begin{aligned}
& \mathbb{E}_{m,t-1} \left\| \left( \hat{A}_t^{(m)}\tilde{\theta}^{(m-1)} - \hat{A}_t^{(m)}\theta^* \right) - \left( \hat{A}^{(m)}\tilde{\theta}^{(m-1)} - \hat{A}^{(m)}\theta^* \right) \right\|^2 \\
&= \text{Var}_{m,t-1} \left( \hat{A}_t^{(m)}\tilde{\theta}^{(m-1)} - \hat{A}_t^{(m)}\theta^* \right) \\
&\leq \mathbb{E}_{m,t-1} \left( \hat{A}_t^{(m)}\tilde{\theta}^{(m-1)} - \hat{A}_t^{(m)}\theta^* \right)^2 \\
&\leq \mathbb{E}_{m,t-1} \|\hat{A}_t^{(m)}\|^2 \|\tilde{\theta}^{(m-1)} - \theta^*\|^2,
\end{aligned} \tag{79}$$

859 and similarly, the last term of eq. (78) can be bounded as

$$\mathbb{E}_{m,t-1} \|B_t^{(m)}\tilde{z}^{(m-1)} - B^{(m)}\tilde{z}^{(m-1)}\|^2 \leq \mathbb{E}_{m,t-1} \|B_t^{(m)}\|^2 \|\tilde{z}^{(m-1)}\|^2 \tag{80}$$

860 Combining Lemma I.1, (80), (79), and (78), we get the desired bound

$$\begin{aligned}
& \mathbb{E}_{m,0} \|G_t^{(m)}(\theta_t^{(m)}, z_t^{(m)}) - G_t^{(m)}(\tilde{\theta}^{(m-1)}, \tilde{z}^{(m-1)}) + G^{(m)}(\tilde{\theta}^{(m-1)}, \tilde{z}^{(m-1)})\|^2 \\
&\leq 5(1+\gamma)^2 \rho_{\max}^2 \left( 1 + \frac{\gamma \rho_{\max}}{\min |\lambda(C)|} \right)^2 \left( \mathbb{E}_{m,0} \|\theta_t^{(m)} - \theta^*\|^2 + \mathbb{E}_{m,0} \|\tilde{\theta}^{(m-1)} - \theta^*\|^2 \right) \\
&\quad + 5\gamma^2 \rho_{\max}^2 \left( \mathbb{E}_{m,0} \|z_t^{(m)}\|^2 + \mathbb{E}_{m,0} \|\tilde{z}^{(m-1)}\|^2 \right) + \frac{1}{M} \cdot 5K_1.
\end{aligned}$$

861

□

862 **Lemma I.7** (One-Step Update of  $z_t^{(m)}$ ). *Under the same assumption as those of Theorem 4.1, the*  
863 *square norm of one-step update of  $z_t^{(m)}$  using Algorithm 2 is bounded as*

$$\begin{aligned}
& \mathbb{E}_{m,0} \|H_t^{(m)}(\theta_t^{(m)}, z_t^{(m)}) - H_t^{(m)}(\tilde{\theta}^{(m-1)}, \tilde{z}^{(m-1)}) + H^{(m)}(\tilde{\theta}^{(m-1)}, \tilde{z}^{(m-1)})\|^2 \\
&\leq 5(1+\gamma)^2 \rho_{\max}^2 \left( 1 + \frac{1}{\min |\lambda(C)|} \right)^2 \left( \mathbb{E}_{m,0} \|\theta_t^{(m)} - \theta^*\|^2 + \mathbb{E}_{m,0} \|\tilde{\theta}^{(m-1)} - \theta^*\|^2 \right) \\
&\quad + 5 \left( \mathbb{E}_{m,0} \|z_t^{(m)}\|^2 + \mathbb{E}_{m,0} \|\tilde{z}^{(m-1)}\|^2 \right) + \frac{5K_5}{M}.
\end{aligned}$$

864 where  $K_5$  is specified in eq. (76) of Lemma I.5.

865 *Proof.* The proof is very similar to that of Lemma I.6 and we outline the proof below. We obtain that

$$\begin{aligned}
& \|H_t^{(m)}(\theta_t^{(m)}, z_t^{(m)}) - H_t^{(m)}(\tilde{\theta}^{(m-1)}, \tilde{z}^{(m-1)}) + H^{(m)}(\tilde{\theta}^{(m-1)}, \tilde{z}^{(m-1)})\|^2 \\
&\leq 5\|\bar{A}_t^{(m)}\|^2\|\theta_t^{(m)} - \theta^*\|^2 + 5\left\| \left( \bar{A}_t^{(m)}\tilde{\theta}^{(m-1)} - \bar{A}_t^{(m)}\theta^* \right) - \left( \bar{A}^{(m)}\tilde{\theta}^{(m-1)} - \bar{A}^{(m)}\theta^* \right) \right\|^2 + 5\|\bar{A}^{(m)}\theta^* + \bar{b}^{(m)}\|^2 \\
&\quad + 5\|C_t^{(m)}\|^2\|z_t^{(m)}\|^2 + 5\|C_t^{(m)}\tilde{z}^{(m-1)} - C^{(m)}\tilde{z}^{(m-1)}\|^2.
\end{aligned}$$

866 Taking  $\mathbb{E}_{m,0}$  on both sides of the above inequality yields that

$$\begin{aligned}
& \mathbb{E}_{m,0} \|H_t^{(m)}(\theta_t^{(m)}, z_t^{(m)}) - H_t^{(m)}(\tilde{\theta}^{(m-1)}, \tilde{z}^{(m-1)}) + H^{(m)}(\tilde{\theta}^{(m-1)}, \tilde{z}^{(m-1)})\|^2 \\
&\leq 5(1+\gamma)^2 \rho_{\max}^2 \left( 1 + \frac{1}{\min |\lambda(C)|} \right)^2 \left( \mathbb{E}_{m,0} \|\theta_t^{(m)} - \theta^*\|^2 + \mathbb{E}_{m,0} \|\tilde{\theta}^{(m-1)} - \theta^*\|^2 \right) \\
&\quad + 5 \left( \mathbb{E}_{m,0} \|z_t^{(m)}\|^2 + \mathbb{E}_{m,0} \|\tilde{z}^{(m-1)}\|^2 \right) + \frac{5K_5}{M}.
\end{aligned}$$

867

□

## 868 J Other Lemmas on Constant-Level Bounds

869 **Lemma J.1.** *The following constant-level bounds hold.*

$$\begin{aligned}
 870 \quad & \bullet \|\widehat{A}_t^{(m)}\| \leq (1 + \gamma)\rho_{\max}\left(1 + \frac{\gamma\rho_{\max}}{\min|\lambda(C)|}\right) \\
 871 \quad & \bullet \|\widehat{b}_t^{(m)}\| \leq \rho_{\max}r_{\max}\left(1 + \frac{\gamma\rho_{\max}}{\min|\lambda(C)|}\right) \\
 872 \quad & \bullet \|\bar{A}_t^{(m)}\| \leq (1 + \gamma)\rho_{\max}\left(1 + \frac{1}{\min|\lambda(C)|}\right) \\
 873 \quad & \bullet \|\bar{b}_t^{(m)}\| \leq \rho_{\max}r_{\max}\left(1 + \frac{1}{\min|\lambda(C)|}\right)
 \end{aligned}$$

874 *Proof.* We prove the first inequality as an example. For the rest of them, we omit the proof details.

875 Recall that  $\widehat{A}_t^{(m)} := A_t^{(m)} - B_t^{(m)}C^{-1}A$ , from which we obtain that

$$\begin{aligned}
 \|\widehat{A}_t^{(m)}\| &= \|A_t^{(m)} - B_t^{(m)}C^{-1}A\| \\
 &\leq \|A_t^{(m)}\| + \|B_t^{(m)}\|\|C^{-1}\|\|A\| \\
 &\leq (1 + \gamma)\rho_{\max} + \gamma\rho_{\max}\frac{1}{\min|\lambda(C)|}(1 + \gamma)\rho_{\max} \\
 &= (1 + \gamma)\rho_{\max}\left(1 + \frac{\gamma\rho_{\max}}{\min|\lambda(C)|}\right),
 \end{aligned}$$

876 where the third step applies Assumption 2.2 to the definitions in eq. (1), more precisely,

$$\begin{aligned}
 877 \quad & \|A_t^{(m)}\| = \|\rho(s_t^{(m)}, a_t^{(m)})\phi(s_t^{(m)})(\gamma\phi(s_{t+1}^{(m)}) - \phi(s_t^{(m)})^\top)\| \leq (1 + \gamma)\rho_{\max} \text{ and } \|B_t^{(m)}\| = \| - \\
 878 \quad & \gamma\rho(s_t^{(m)}, a_t^{(m)})\phi(s_{t+1}^{(m)})\phi(s_t^{(m)})^\top\|. \text{ Similarly, we can obtain the following results:}
 \end{aligned}$$

$$\begin{aligned}
 \|\widehat{b}_t^{(m)}\| &= \|b_t^{(m)} - B_t^{(m)}C^{-1}b\| \\
 &\leq \|b_t^{(m)}\| + \|B_t^{(m)}\|\|C^{-1}\|\|b\| \\
 &\leq \rho_{\max}r_{\max} + \gamma\rho_{\max}\frac{1}{\min|\lambda(C)|}\rho_{\max}r_{\max} \\
 &= \rho_{\max}r_{\max}\left(1 + \frac{\gamma\rho_{\max}}{\min|\lambda(C)|}\right);
 \end{aligned}$$

879

$$\begin{aligned}
 \|\bar{A}_t^{(m)}\| &= \|A_t^{(m)} - C_t^{(m)}C^{-1}A\| \\
 &\leq (1 + \gamma)\rho_{\max} + \frac{1}{\min|\lambda(C)|}(1 + \gamma)\rho_{\max} \\
 &= (1 + \gamma)\rho_{\max}\left(1 + \frac{1}{\min|\lambda(C)|}\right);
 \end{aligned}$$

880

$$\begin{aligned}
 \|\bar{b}_t^{(m)}\| &= \|b_t^{(m)} - C_t^{(m)}C^{-1}b\| \\
 &\leq \rho_{\max}r_{\max} + \frac{1}{\min|\lambda(C)|}\rho_{\max}r_{\max} \\
 &= \rho_{\max}r_{\max}\left(1 + \frac{1}{\min|\lambda(C)|}\right).
 \end{aligned}$$

881

□

882 **Lemma J.2.** *The following constant-level bound holds.*

$$\|\widehat{A}_t^{(m)}\theta^* + \widehat{b}_t^{(m)}\| \leq [(1 + \gamma)R_\theta + r_{\max}]\rho_{\max}\left(1 + \frac{\gamma\rho_{\max}}{\min|\lambda(C)|}\right).$$

883 *Proof.* Combining Lemma J.1 and the assumption that  $\|\theta^*\| \leq R_\theta$ , we have

$$\|\widehat{A}_t^{(m)}\theta^* + \widehat{b}_t^{(m)}\| \leq \|\widehat{A}_t^{(m)}\|R_\theta + \|\widehat{b}_t^{(m)}\|$$

$$\begin{aligned}
&\leq (1 + \gamma)\rho_{\max}\left(1 + \frac{\gamma\rho_{\max}}{\min |\lambda(C)|}\right)R_{\theta} + \rho_{\max}r_{\max}\left(1 + \frac{\gamma\rho_{\max}}{\min |\lambda(C)|}\right) \\
&= [(1 + \gamma)R_{\theta} + r_{\max}]\rho_{\max}\left(1 + \frac{\gamma\rho_{\max}}{\min |\lambda(C)|}\right).
\end{aligned}$$

884

□

885 **Lemma J.3.** *The following constant-level bound holds.*

$$\|\bar{A}^{(m)}\theta^* + \bar{b}^{(m)}\| \leq [(1 + \gamma)R_{\theta} + r_{\max}]\rho_{\max}\left(1 + \frac{1}{\min |\lambda(C)|}\right)$$

886 *Proof.* Combining Lemma J.1 and  $\|\theta^*\| \leq R_{\theta}$ , we have

$$\begin{aligned}
\|\bar{A}^{(m)}\theta^* + \bar{b}^{(m)}\| &\leq \|\bar{A}_t^{(m)}\|R_{\theta} + \|\bar{b}_t^{(m)}\| \\
&\leq (1 + \gamma)\rho_{\max}\left(1 + \frac{1}{\min |\lambda(C)|}\right)R_{\theta} + \rho_{\max}r_{\max}\left(1 + \frac{1}{\min |\lambda(C)|}\right) \\
&= [(1 + \gamma)R_{\theta} + r_{\max}]\rho_{\max}\left(1 + \frac{1}{\min |\lambda(C)|}\right).
\end{aligned}$$

887

□

888 **Lemma J.4** (One-Step Update of  $\theta_t^{(m)}$ ). *The upper bound of one-step update of  $\theta_t^{(m)}$  given in both*  
889 *Algorithm 1 and Algorithm 2 is given by*

$$\|G_t^{(m)}(\theta_t^{(m)}, z_t^{(m)}) - G_t^{(m)}(\tilde{\theta}^{(m-1)}, \tilde{z}^{(m-1)}) + G^{(m)}(\tilde{\theta}^{(m-1)}, \tilde{z}^{(m-1)})\| \leq G_{VR},$$

890 where  $G_{VR}$  is defined as

$$G_{VR} := 3[(1 + \gamma)R_{\theta} + r_{\max}]\rho_{\max}\left(1 + \frac{\gamma\rho_{\max}}{\min |\lambda(C)|}\right). \quad (81)$$

*Proof.* Recall that  $G_t^{(m)}(\theta, z) := \hat{A}_t^{(m)}\theta + \hat{b}_t^{(m)} + C_t^{(m)}w$ . Using Lemma J.2 and Lemma J.3, we obtain that

$$\|G_t^{(m)}(\theta, z)\| \leq [(1 + \gamma)R_{\theta} + r_{\max}]\rho_{\max}\left(1 + \frac{\gamma\rho_{\max}}{\min |\lambda(C)|}\right).$$

By the definition of  $G^{(m)}(\tilde{\theta}^{(m-1)}, \tilde{z}^{(m-1)})$  and Jensen's inequality, we obtain that

$$\|G^{(m)}(\tilde{\theta}^{(m-1)}, \tilde{z}^{(m-1)})\| \leq [(1 + \gamma)R_{\theta} + r_{\max}]\rho_{\max}\left(1 + \frac{\gamma\rho_{\max}}{\min |\lambda(C)|}\right).$$

891 Combining the above upper bounds for  $\|G_t^{(m)}(\theta, z)\|$  and  $\|G^{(m)}(\tilde{\theta}^{(m-1)}, \tilde{z}^{(m-1)})\|$ , we further  
892 obtain that

$$\begin{aligned}
&\|G_t^{(m)}(\theta_t^{(m)}, z_t^{(m)}) - G_t^{(m)}(\tilde{\theta}^{(m-1)}, \tilde{z}^{(m-1)}) + G^{(m)}(\tilde{\theta}^{(m-1)}, \tilde{z}^{(m-1)})\| \\
&\leq \|G_t^{(m)}(\theta_t^{(m)}, z_t^{(m)})\| + \|G_t^{(m)}(\tilde{\theta}^{(m-1)}, \tilde{z}^{(m-1)})\| + \|G^{(m)}(\tilde{\theta}^{(m-1)}, \tilde{z}^{(m-1)})\| \\
&\leq 3[(1 + \gamma)R_{\theta} + r_{\max}]\rho_{\max}\left(1 + \frac{\gamma\rho_{\max}}{\min |\lambda(C)|}\right).
\end{aligned}$$

893

□

894 **Lemma J.5** (One-Step Update of  $w_t^{(m)}$ ). *The upper bound of one-step update of  $w_t^{(m)}$  given in both*  
895 *Algorithm 1 and Algorithm 2 is given by*

$$\|H_t^{(m)}(\theta_t^{(m)}, z_t^{(m)}) - H_t^{(m)}(\tilde{\theta}^{(m-1)}, \tilde{z}^{(m-1)}) + H^{(m)}(\tilde{\theta}^{(m-1)}, \tilde{z}^{(m-1)})\| \leq H_{VR}$$

896 where  $H_{VR}$  is defined as

$$H_{VR} := 3[(1 + \gamma)R_{\theta} + r_{\max}]\rho_{\max}\left(1 + \frac{1}{\min |\lambda(C)|}\right). \quad (82)$$

897 *Proof.* The proof is very similar to that of Lemma J.4 and we omit the proof.

$$\begin{aligned}
& \|H_t^{(m)}(\theta_t^{(m)}, z_t^{(m)}) - H_t^{(m)}(\tilde{\theta}^{(m-1)}, \tilde{z}^{(m-1)}) + H^{(m)}(\tilde{\theta}^{(m-1)}, \tilde{z}^{(m-1)})\| \\
& \leq \|H_t^{(m)}(\theta_t^{(m)}, z_t^{(m)})\| + \|H_t^{(m)}(\tilde{\theta}^{(m-1)}, \tilde{z}^{(m-1)})\| + \|H^{(m)}(\tilde{\theta}^{(m-1)}, \tilde{z}^{(m-1)})\| \\
& \leq 3[(1 + \gamma)R_\theta + r_{\max}] \rho_{\max} \left(1 + \frac{1}{\min |\lambda(C)|}\right).
\end{aligned}$$

898

□

899
